# Supplementary material for: A 96-well microplate bioreactor platform supporting individual dual perfusion and high-throughput assessment of simple or biofabricated 3D tissue models
Source: Royal Society of Chemistry journal article supplement (doi:10.1039/c8lc00485d), 2018-01-01

## Fundamental Units

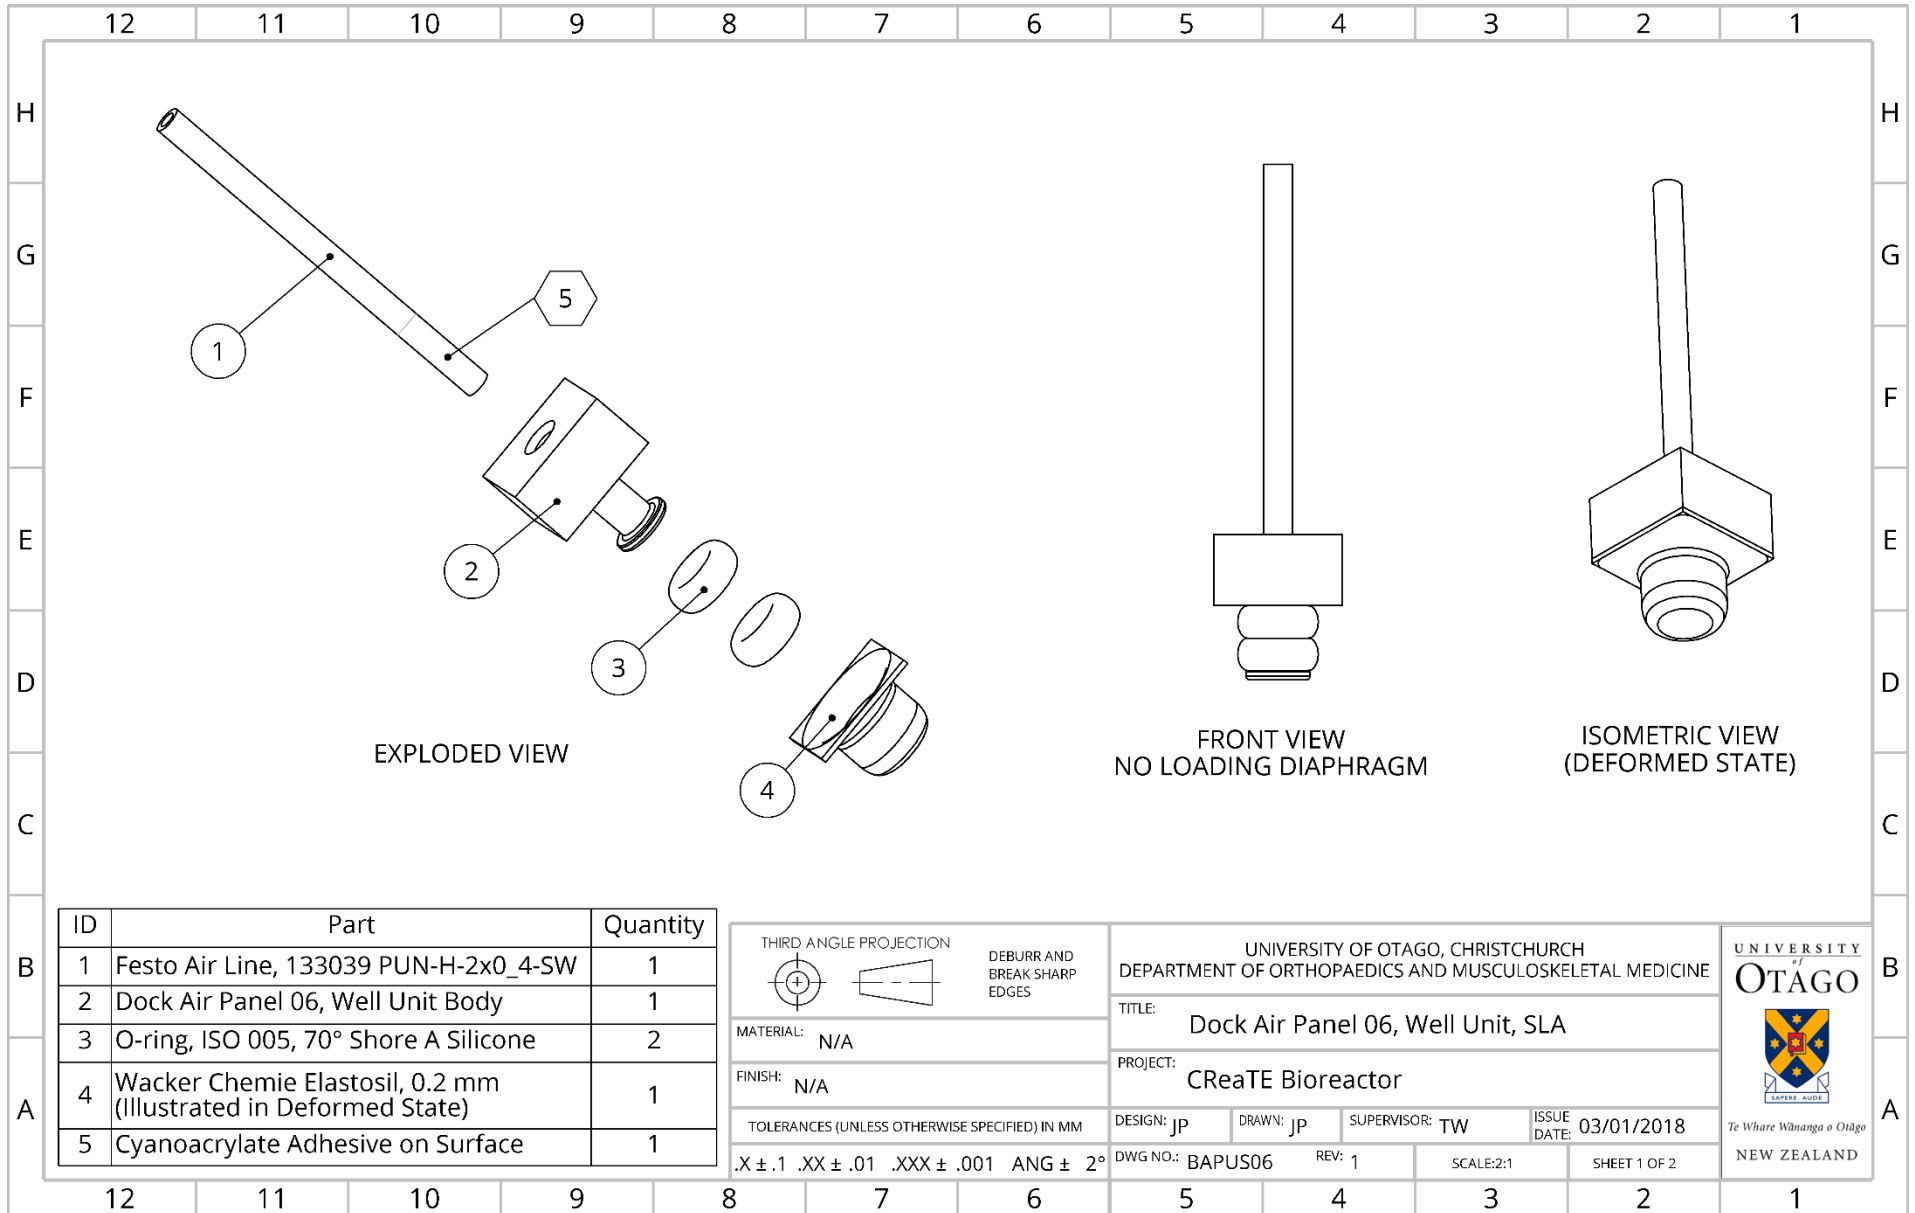

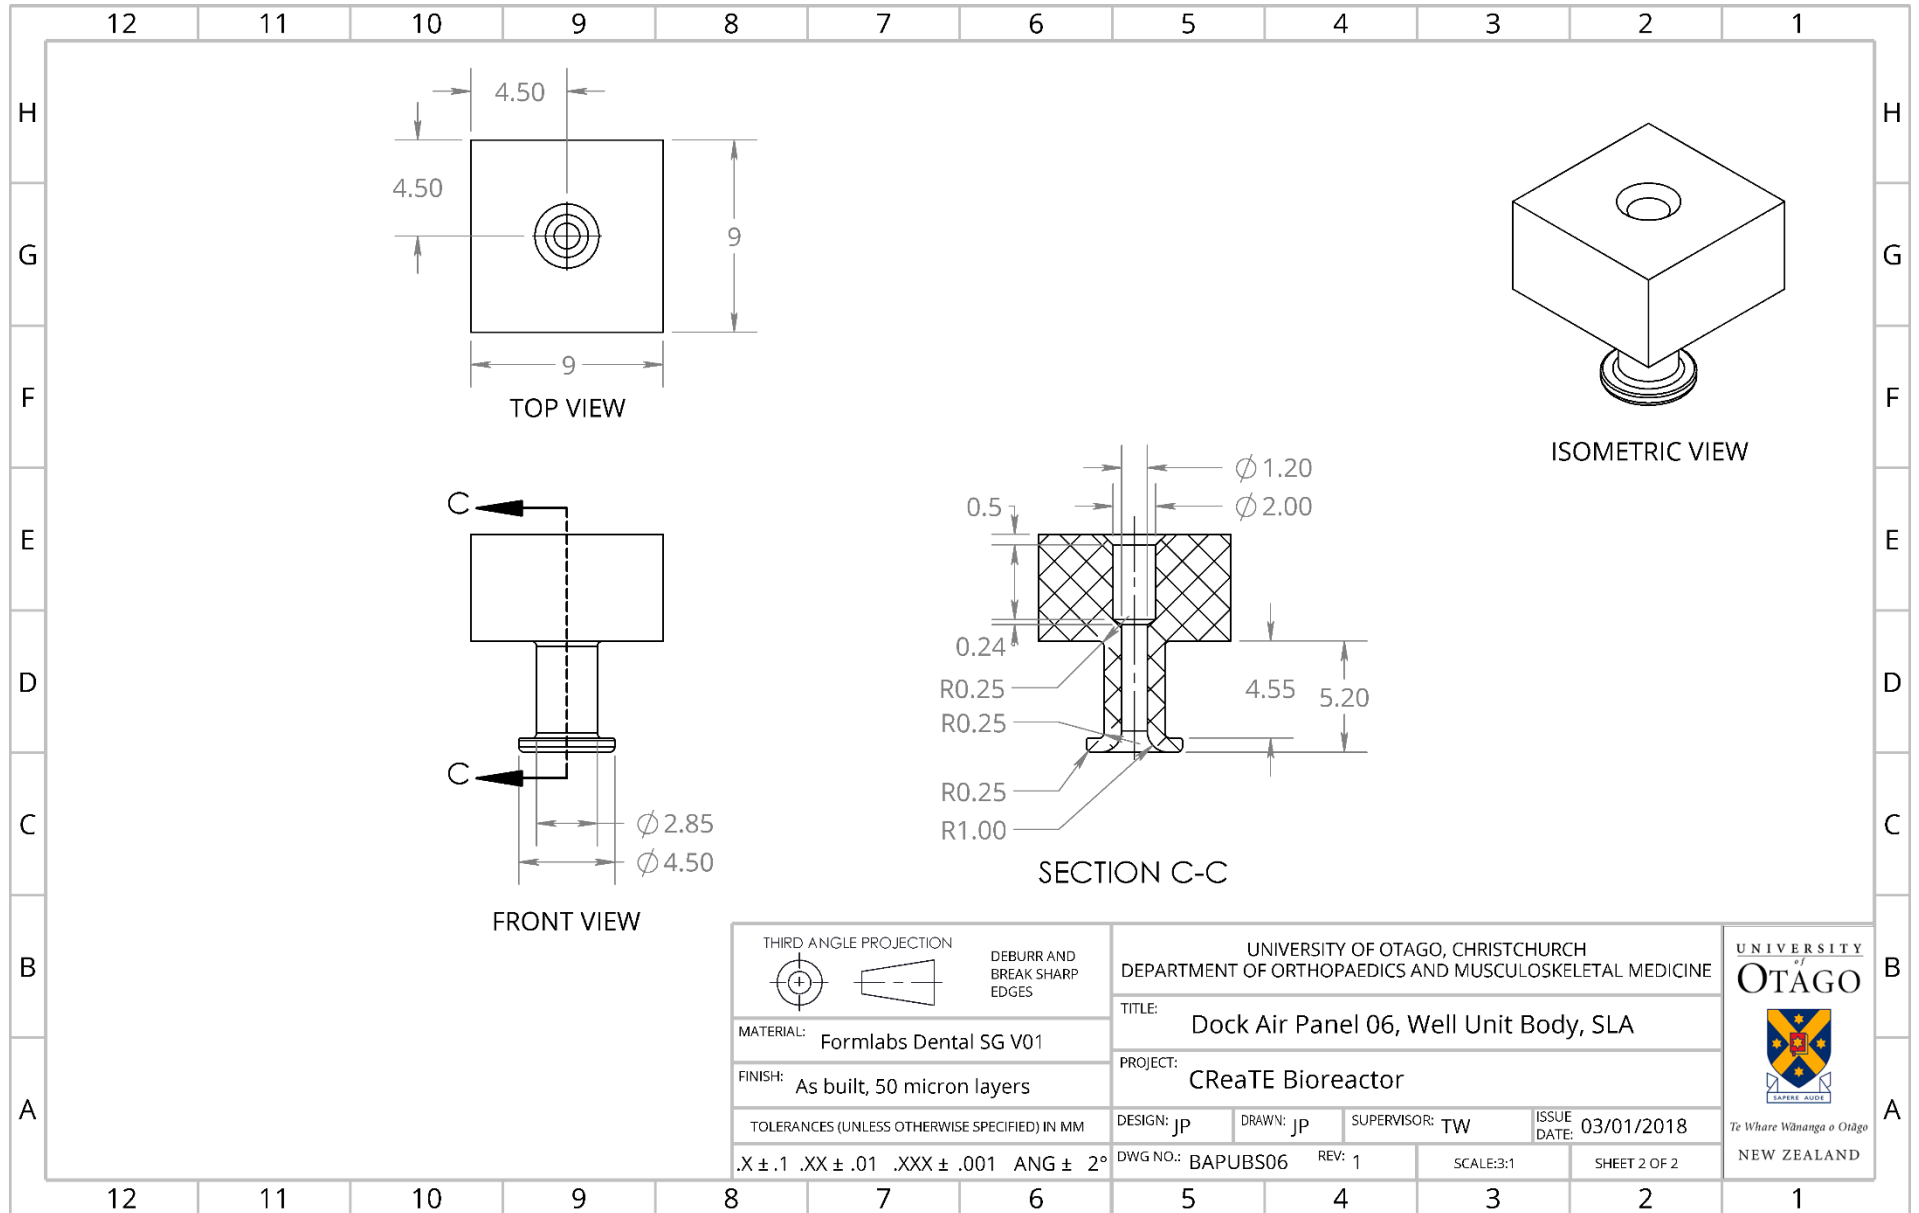

UNIVERSITY OF OTAGO, CHRISTCHURCH  
DEPARTMENT OF ORTHOPAEDICS AND MUSCULOSKELETAL MEDICINE

TITLE: Dock Air Panel 06, Well Unit Body, SLA

PROJECT: CReaTE Bioreactor

DESIGN: jp DRAWN: jp SUPERVISOR: TW ISSUE DATE: 03/01/2018

DWG NO.: BAPUBS06 REV: 1 SCALE:3:1 SHEET 2 OF 2

UNIVERSITY  
of  
OTAGO

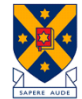

Te Whare Wānanga o Ōtago  
NEW ZEALAND

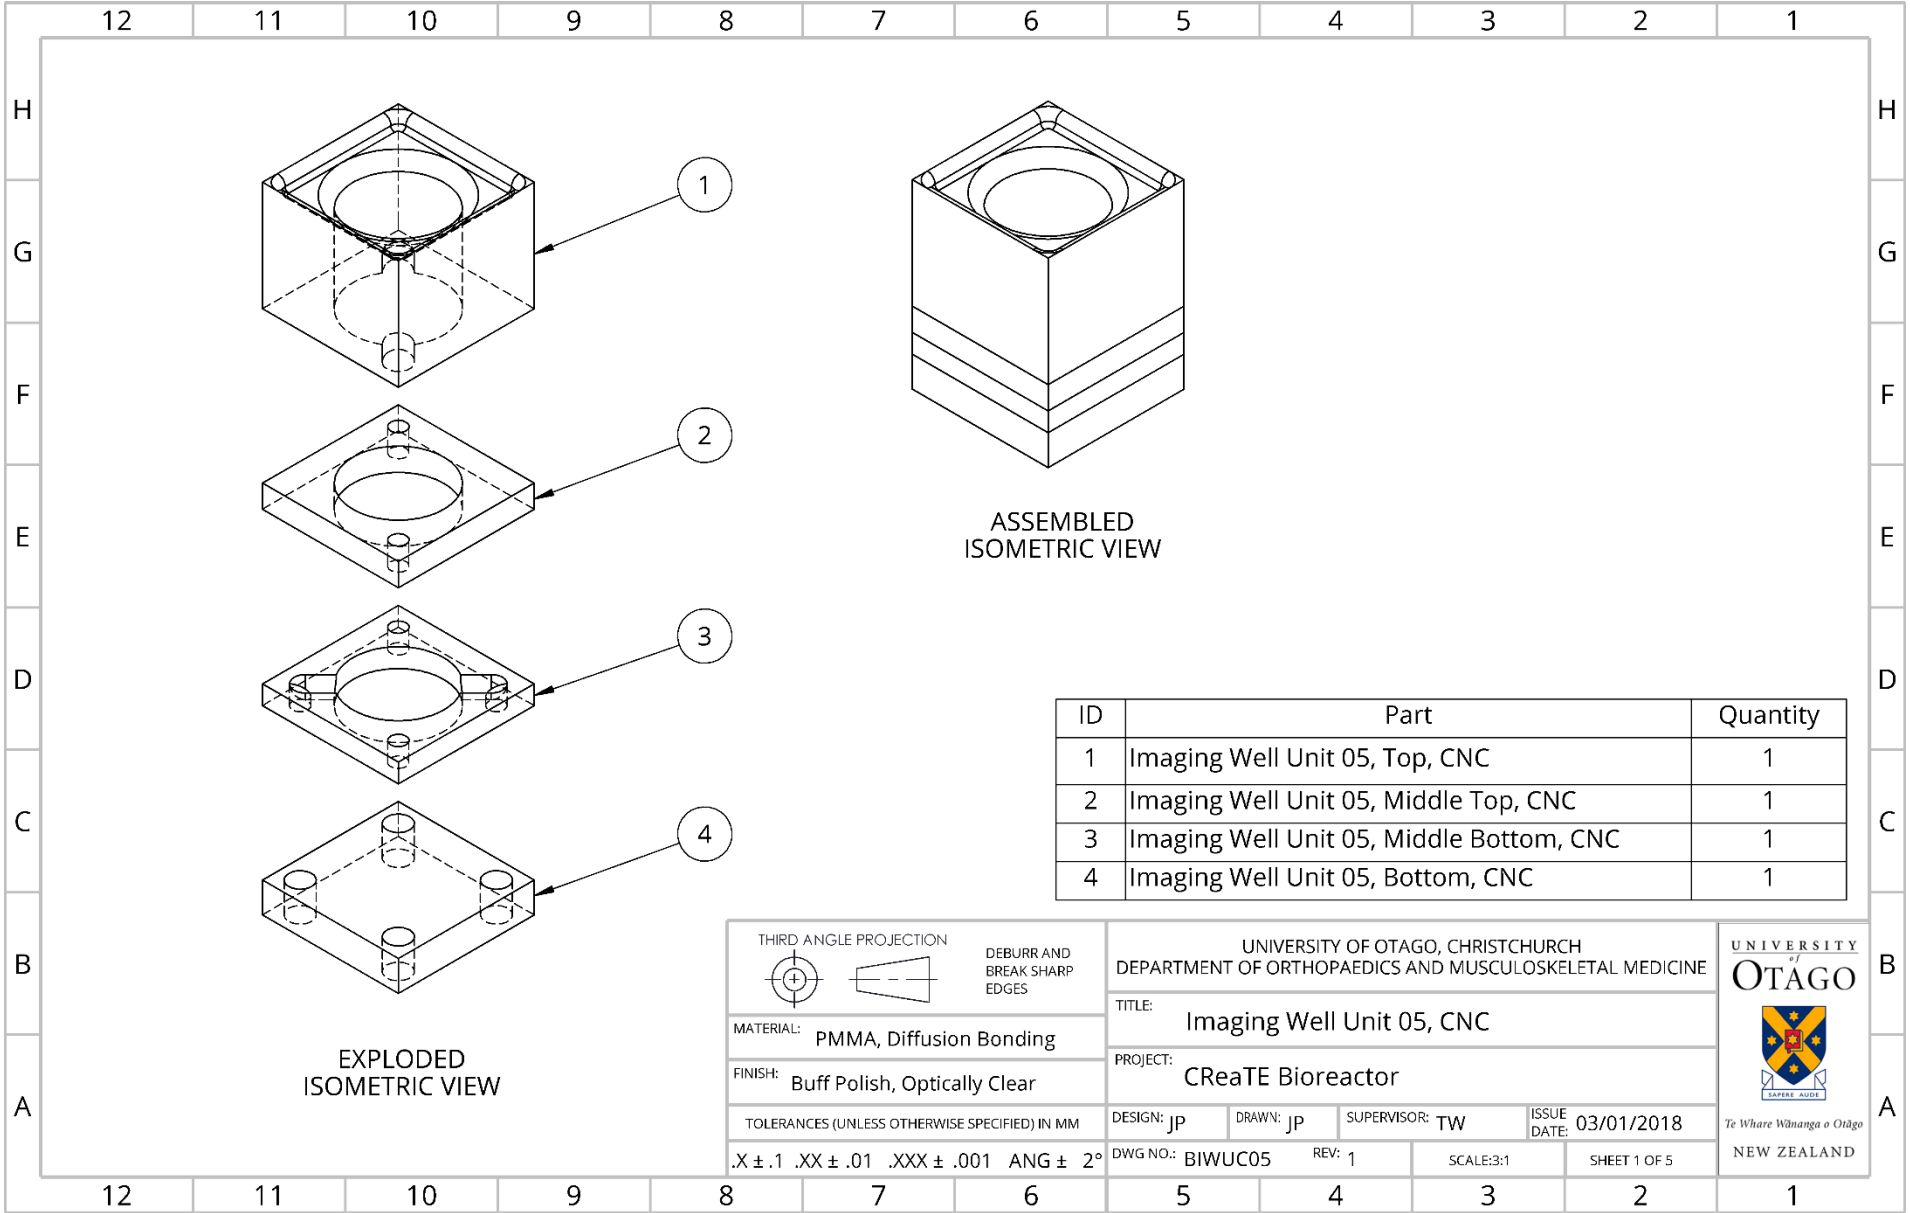

Figure 1: Exploded and Assembled Isometric Views of the Imaging Well Unit 05, CNC. The exploded view shows the four components (1, 2, 3, 4) and their assembly sequence. The assembled view shows the complete unit.



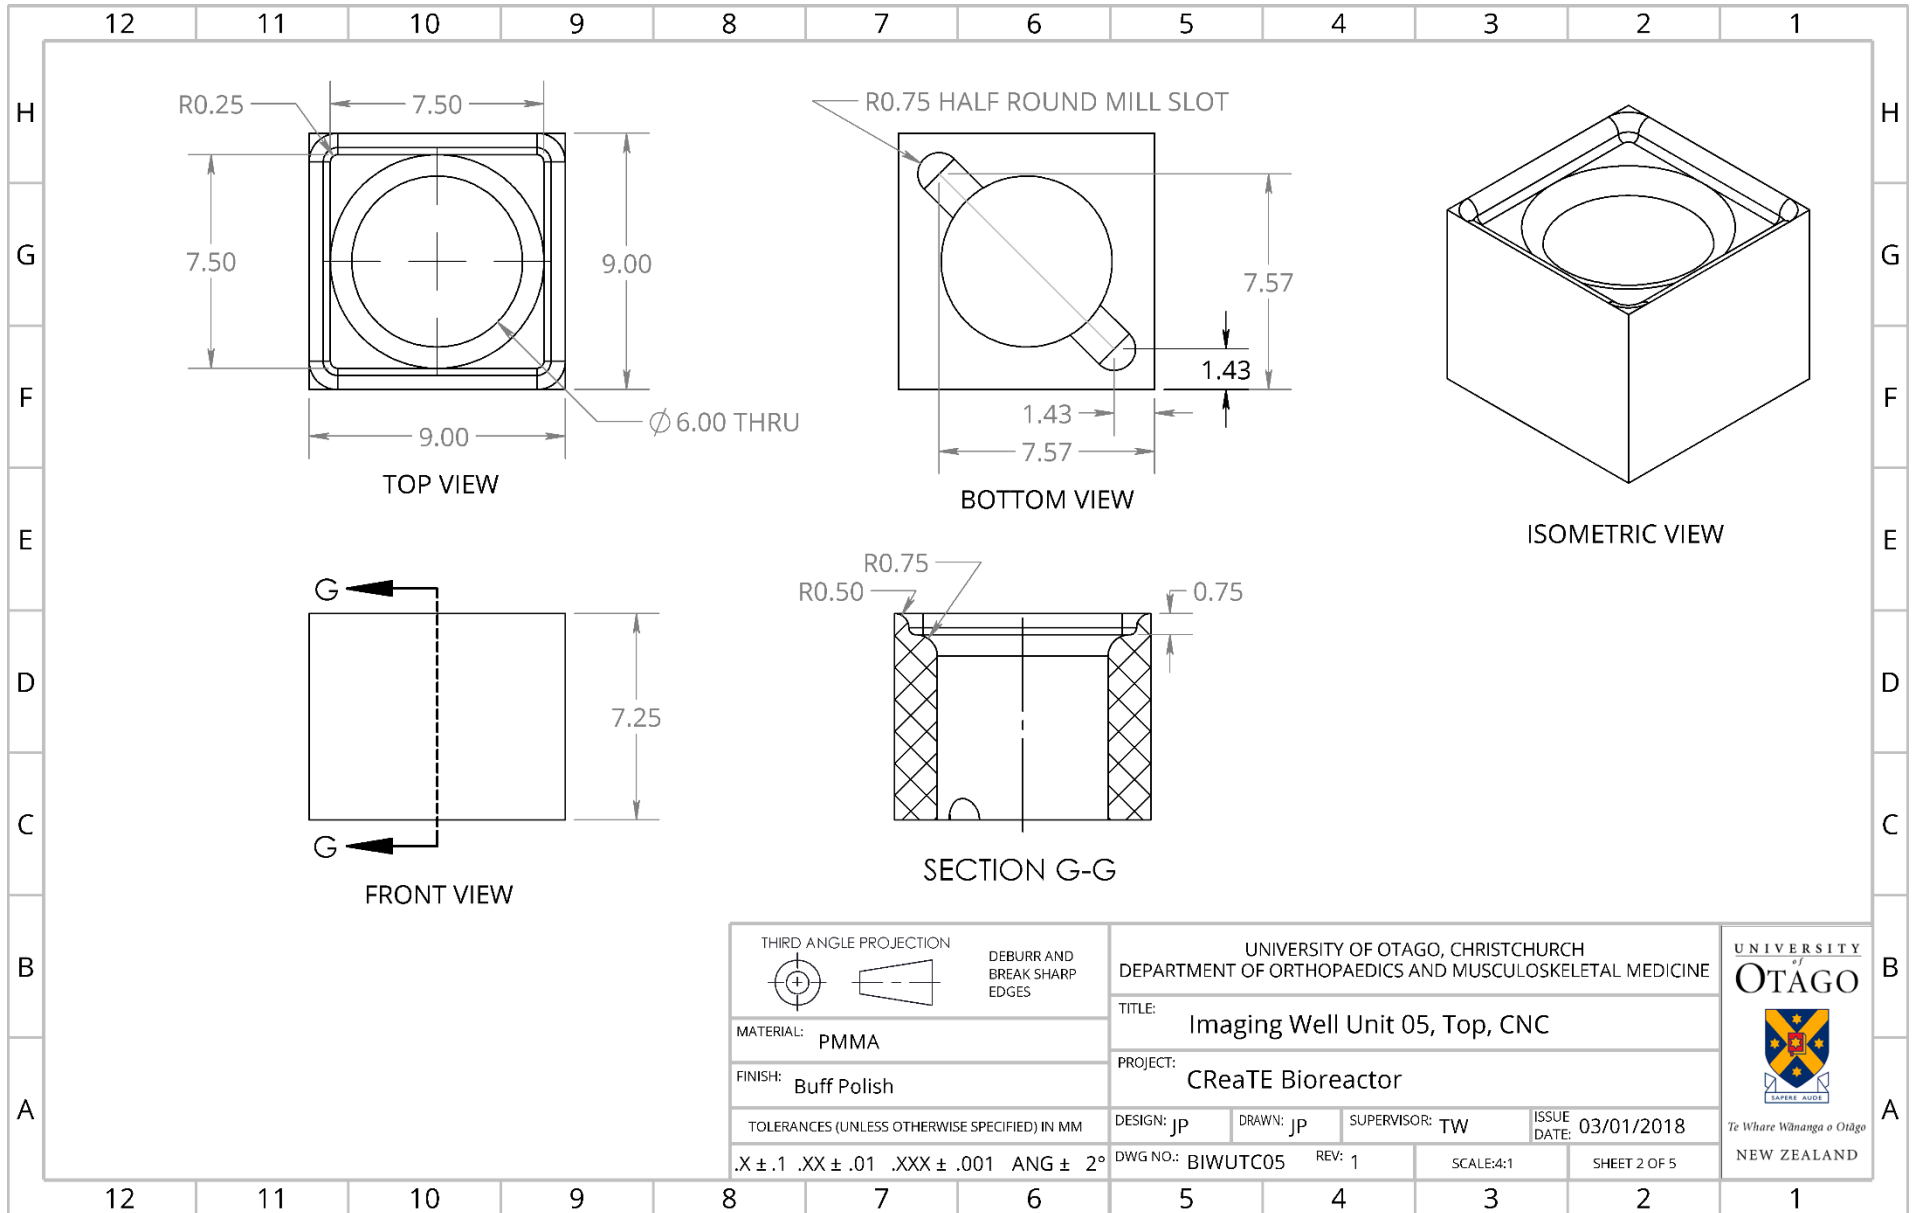

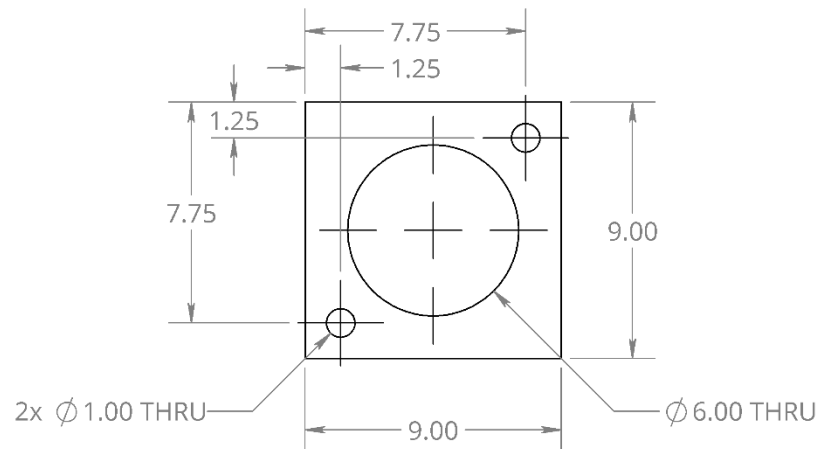

TOP VIEW

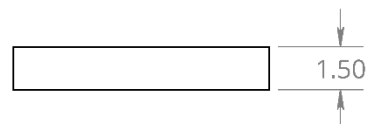

FRONT VIEW

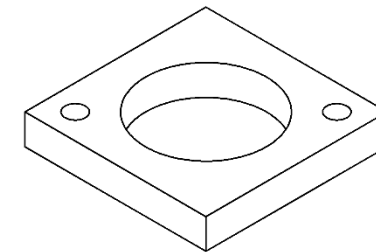

ISOMETRIC VIEW

|                                                                                      |  |                                    |
|--------------------------------------------------------------------------------------|--|------------------------------------|
| THIRD ANGLE PROJECTION                                                               |  | DEBURR AND<br>BREAK SHARP<br>EDGES |
| 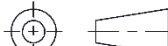 |  |                                    |
| MATERIAL: PMMA                                                                       |  |                                    |
| FINISH: Buff Polish                                                                  |  |                                    |
| TOLERANCES (UNLESS OTHERWISE SPECIFIED) IN MM                                        |  |                                    |
| .X ± .1 .XX ± .01 .XXX ± .001 ANG ± 2                                                |  |                                    |

|                                                                                              |           |                |                        |
|----------------------------------------------------------------------------------------------|-----------|----------------|------------------------|
| UNIVERSITY OF OTAGO, CHRISTCHURCH<br>DEPARTMENT OF ORTHOPAEDICS AND MUSCULOSKELETAL MEDICINE |           |                |                        |
| TITLE: Imaging Well Unit 05, Middle Top, CNC                                                 |           |                |                        |
| PROJECT: CReaTE Bioreactor                                                                   |           |                |                        |
| DESIGN: jp                                                                                   | DRAWN: jp | SUPERVISOR: TW | ISSUE DATE: 03/01/2018 |
| DWG NO.: BIWUMTC05                                                                           | REV: 1    | SCALE: 4:1     | SHEET 3 OF 5           |

|                                         |
|-----------------------------------------|
| UNIVERSITY<br>of<br>OTAGO               |
|                                         |
| Te Whare Wānanga o Ōtago<br>NEW ZEALAND |

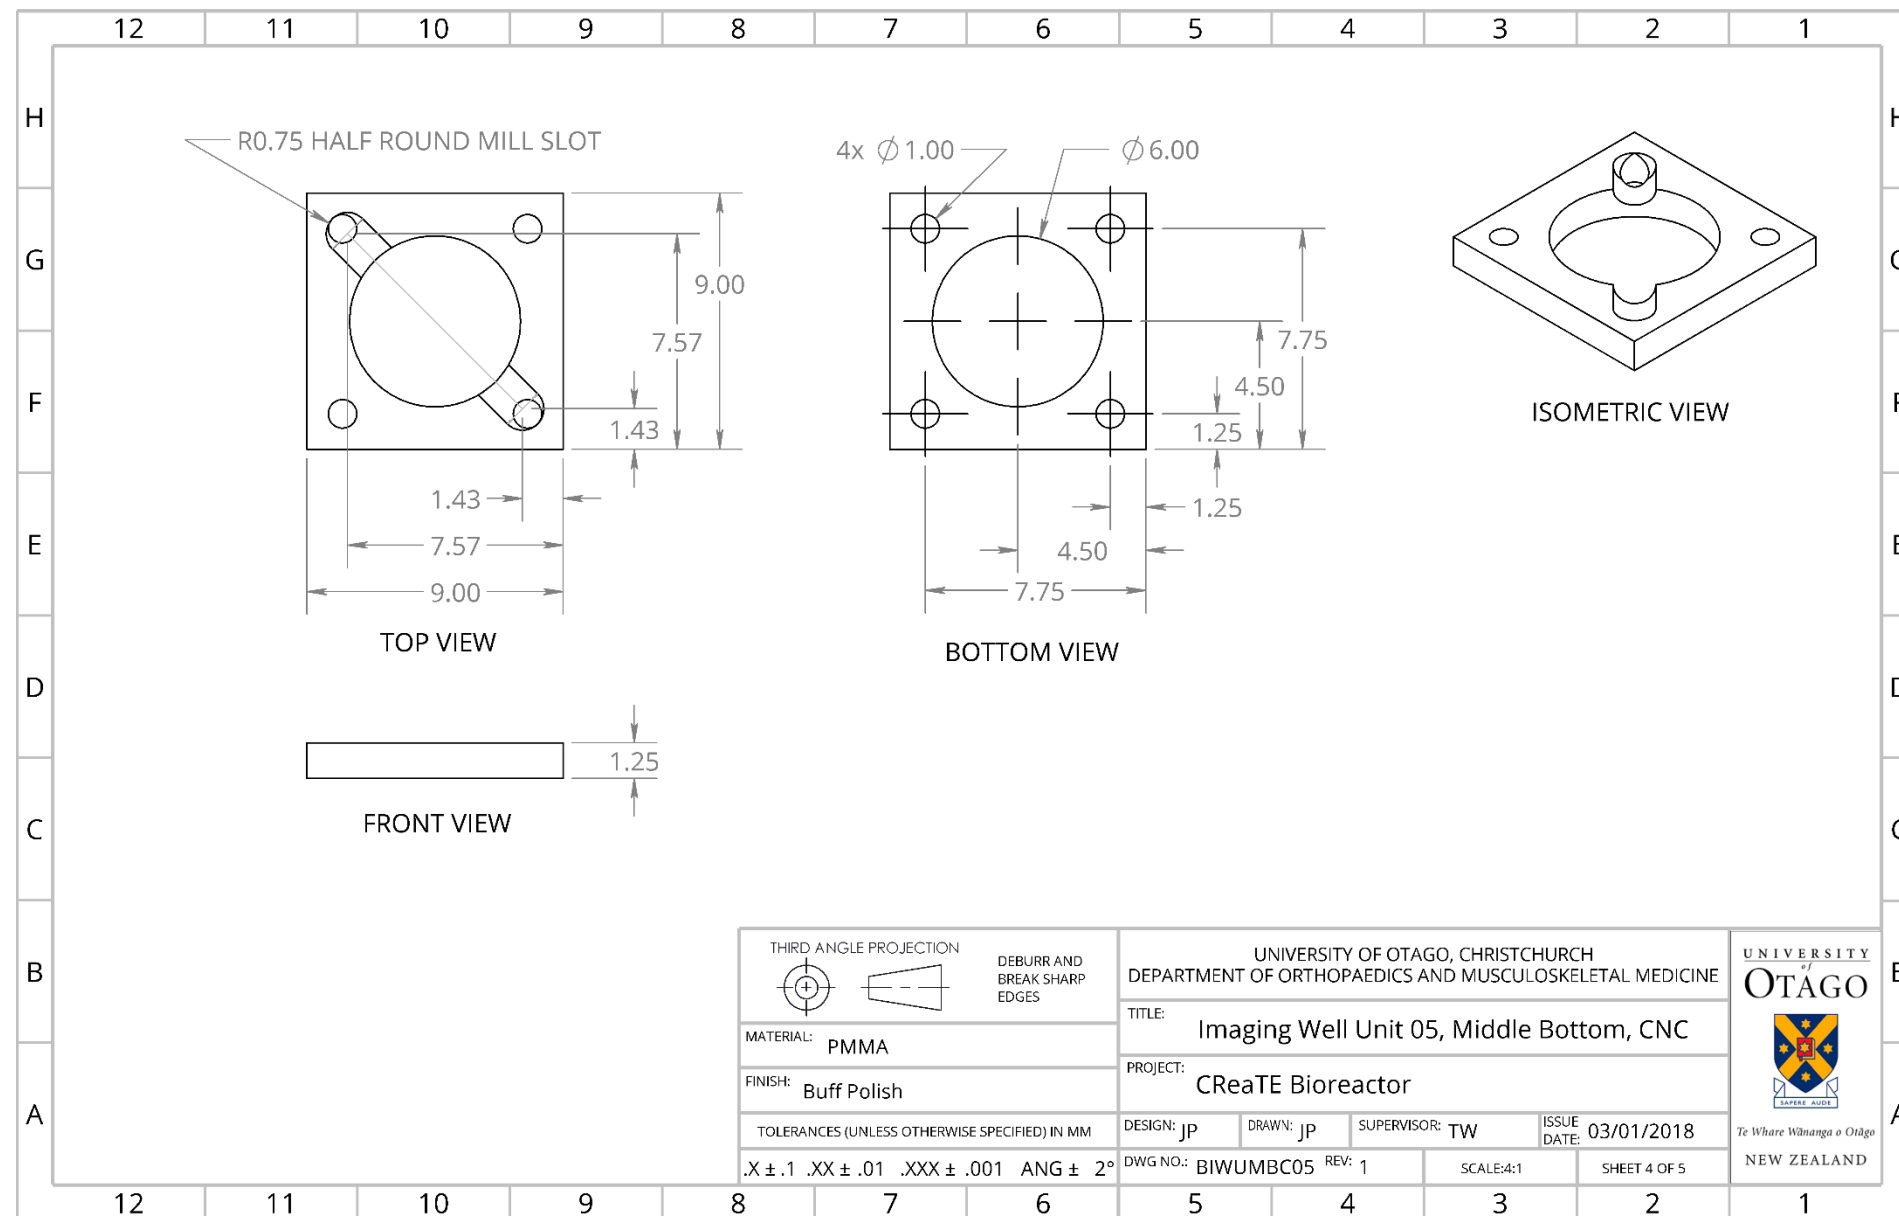

R0.75 HALF ROUND MILL SLOT

4x  $\varnothing 1.00$   $\varnothing 6.00$

ISOMETRIC VIEW

TOP VIEW

BOTTOM VIEW

FRONT VIEW

|                                               |  |                              |           |                                                         |                        |                                                                                                                                  |  |
|-----------------------------------------------|--|------------------------------|-----------|---------------------------------------------------------|------------------------|----------------------------------------------------------------------------------------------------------------------------------|--|
| THIRD ANGLE PROJECTION                        |  | DEBURR AND BREAK SHARP EDGES |           | UNIVERSITY OF OTAGO, CHRISTCHURCH                       |                        |                                                                                                                                  |  |
|                                               |  |                              |           | DEPARTMENT OF ORTHOPAEDICS AND MUSCULOSKELETAL MEDICINE |                        |                                                                                                                                  |  |
| MATERIAL: PMMA                                |  |                              |           | TITLE: Imaging Well Unit 05, Middle Bottom, CNC         |                        |                                                                                                                                  |  |
| FINISH: Buff Polish                           |  |                              |           | PROJECT: CReaTE Bioreactor                              |                        |                                                                                                                                  |  |
| TOLERANCES (UNLESS OTHERWISE SPECIFIED) IN MM |  | DESIGN: jp                   | DRAWN: jp | SUPERVISOR: TW                                          | ISSUE DATE: 03/01/2018 | <br>Te Whare Wānanga o Ōtago<br>NEW ZEALAND |  |
| .X ± .1 .XX ± .01 .XXX ± .001 ANG ± 2°        |  | DWG NO.: BIWUMBC05           |           | REV: 1                                                  | SCALE: 4:1             |                                                                                                                                  |  |
|                                               |  |                              |           |                                                         |                        | SHEET 4 OF 5                                                                                                                     |  |

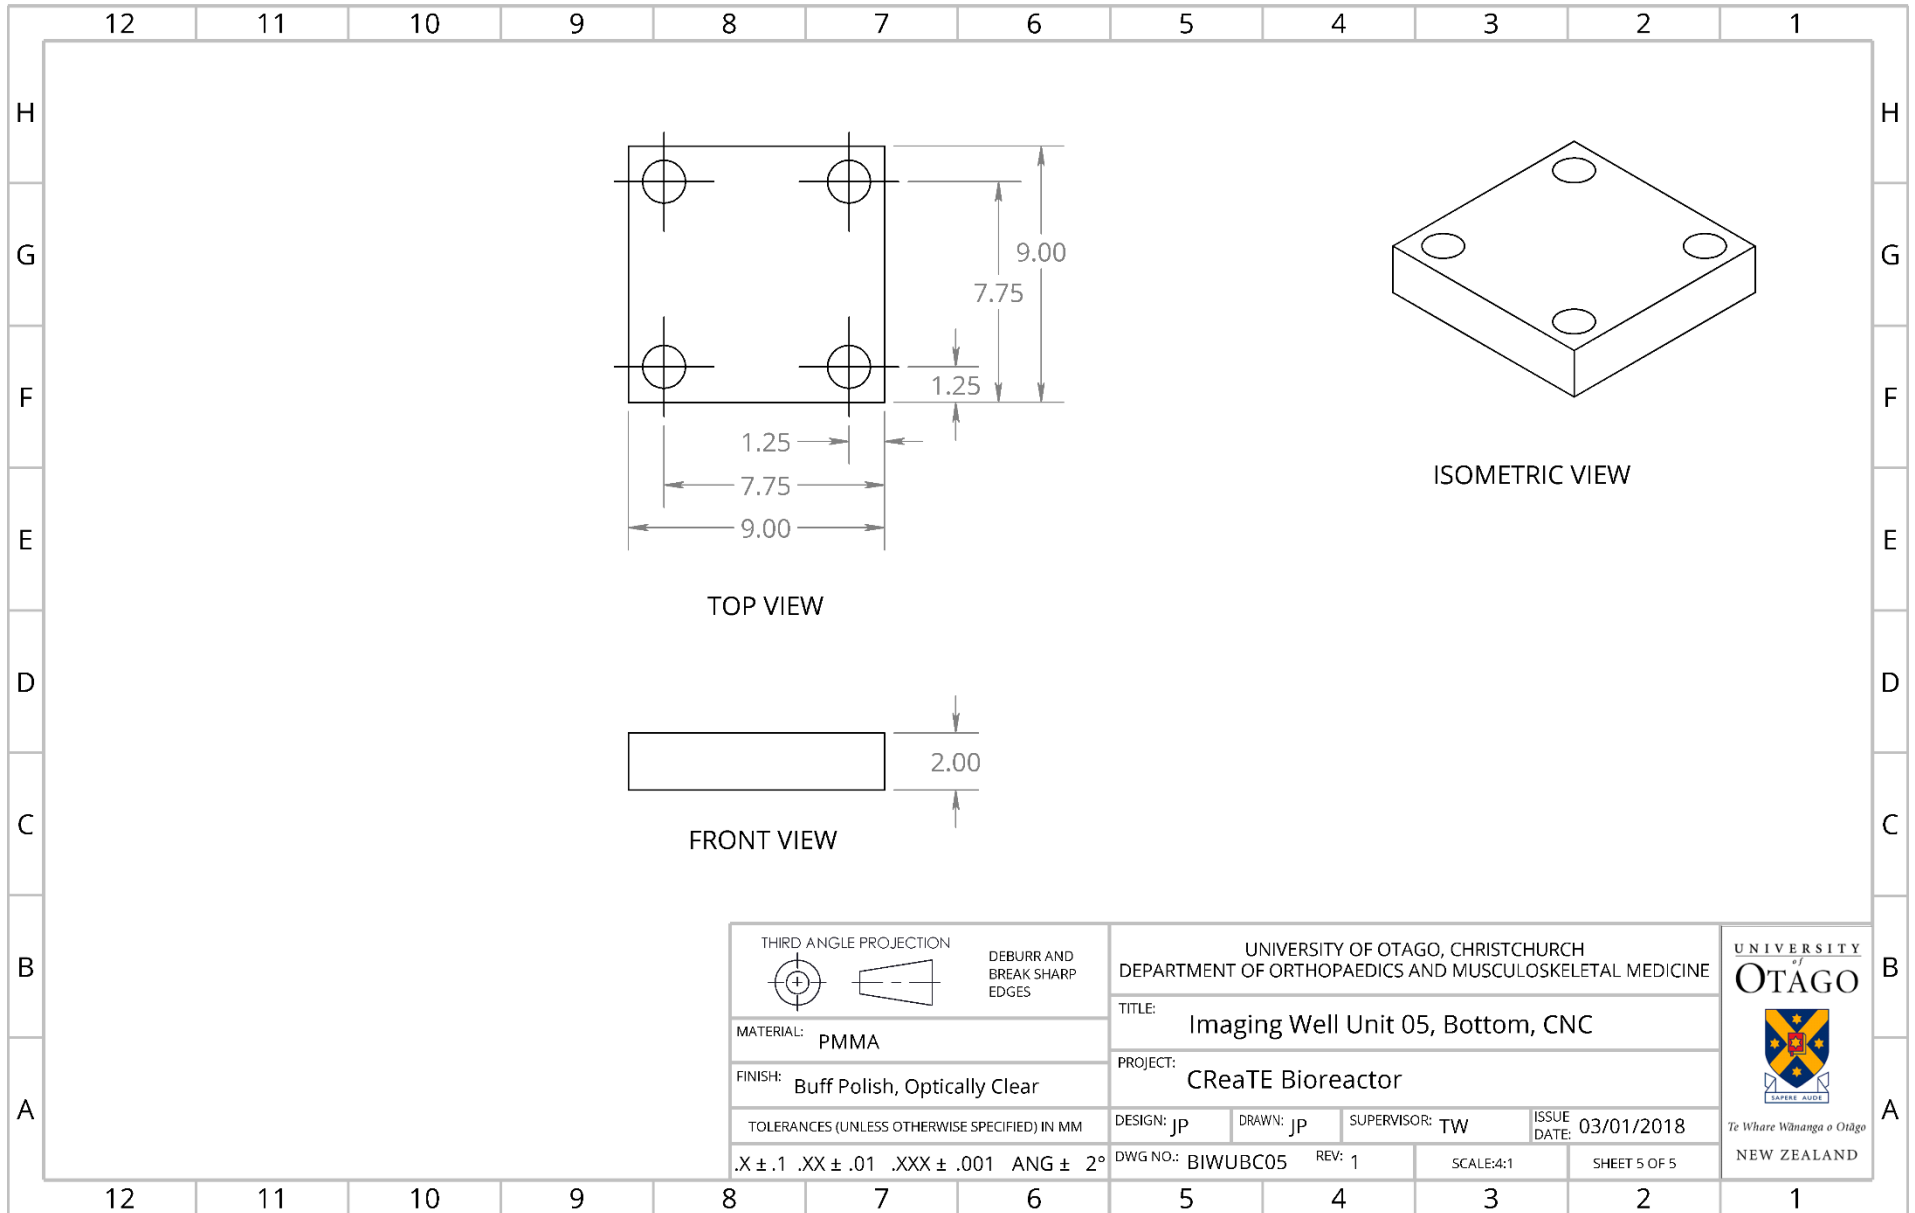

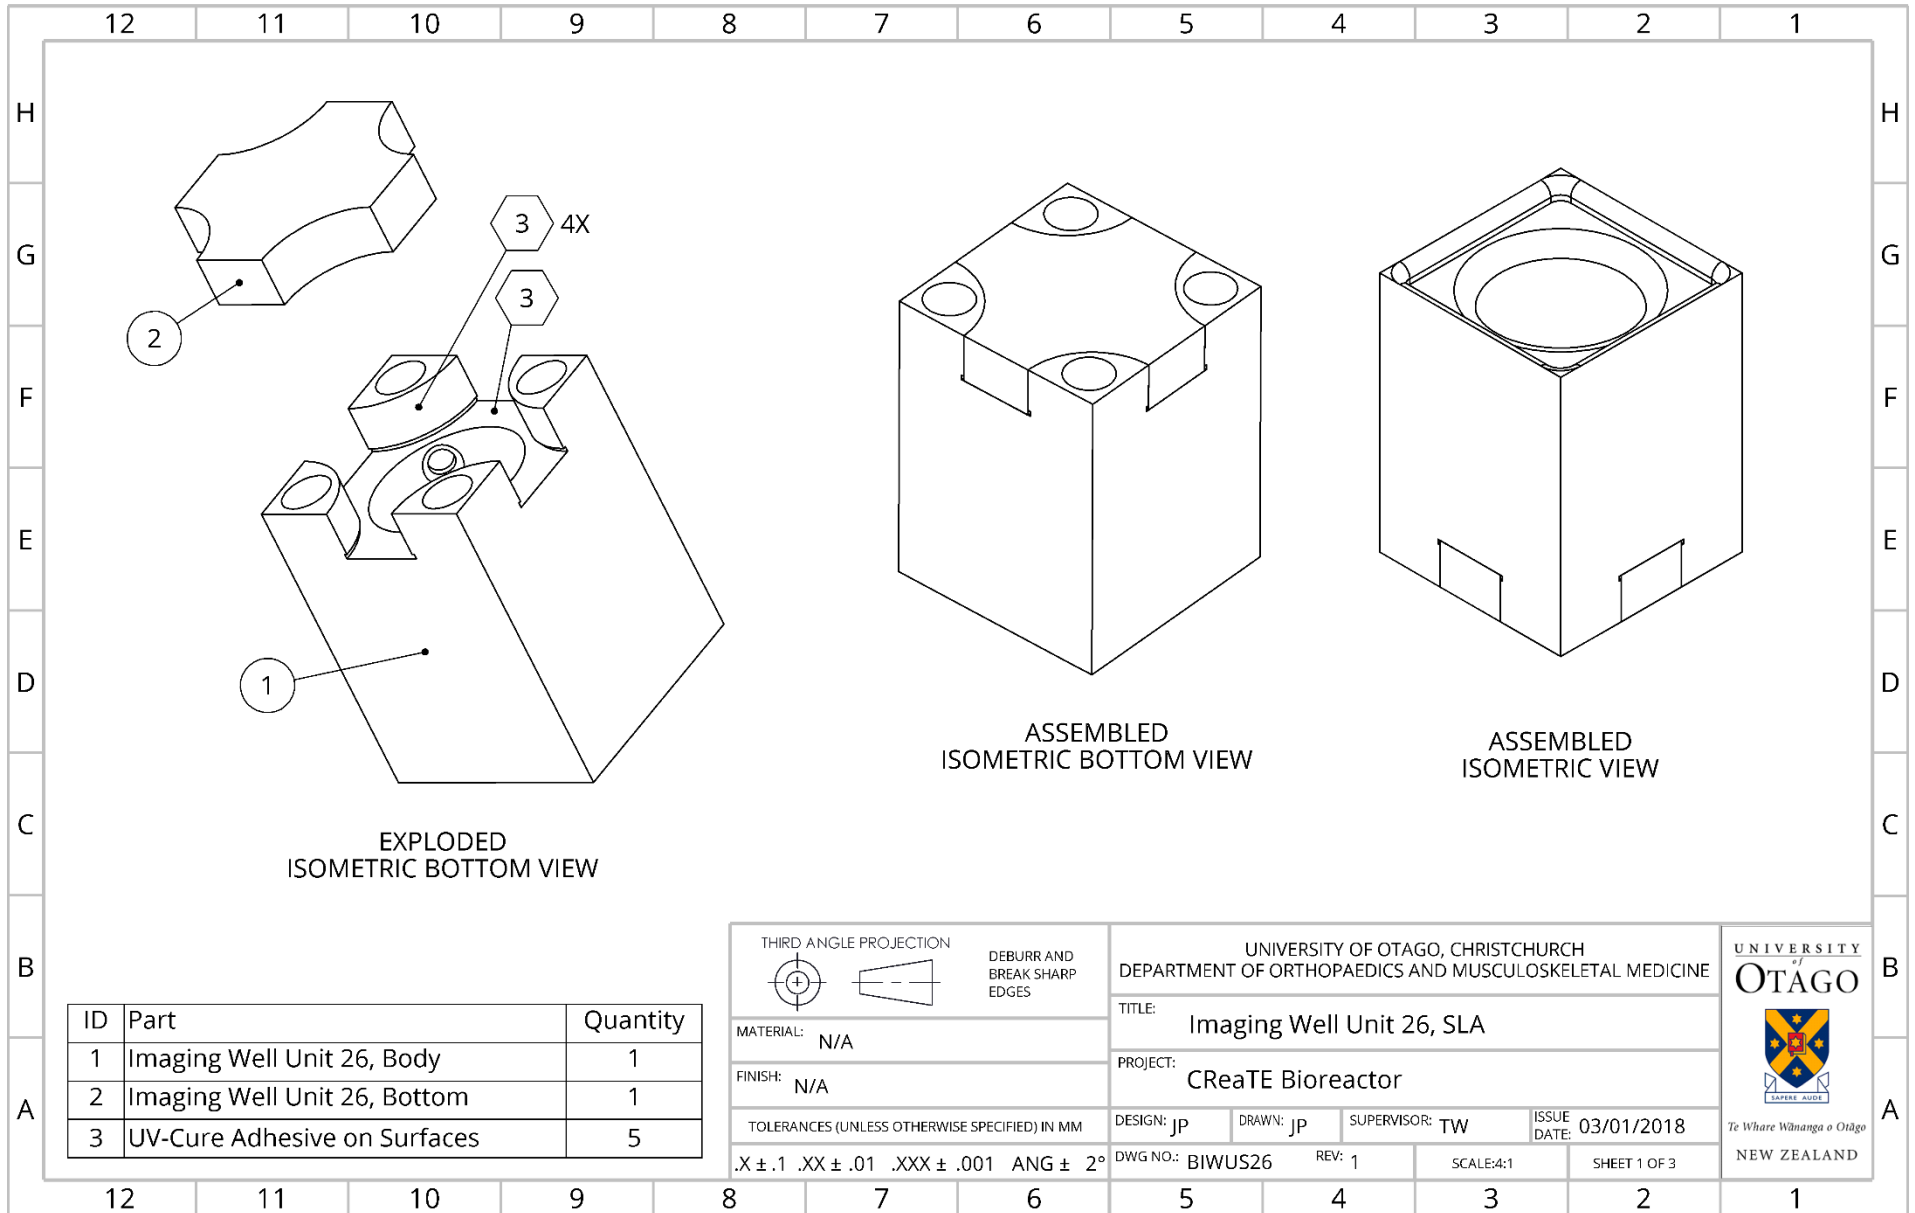

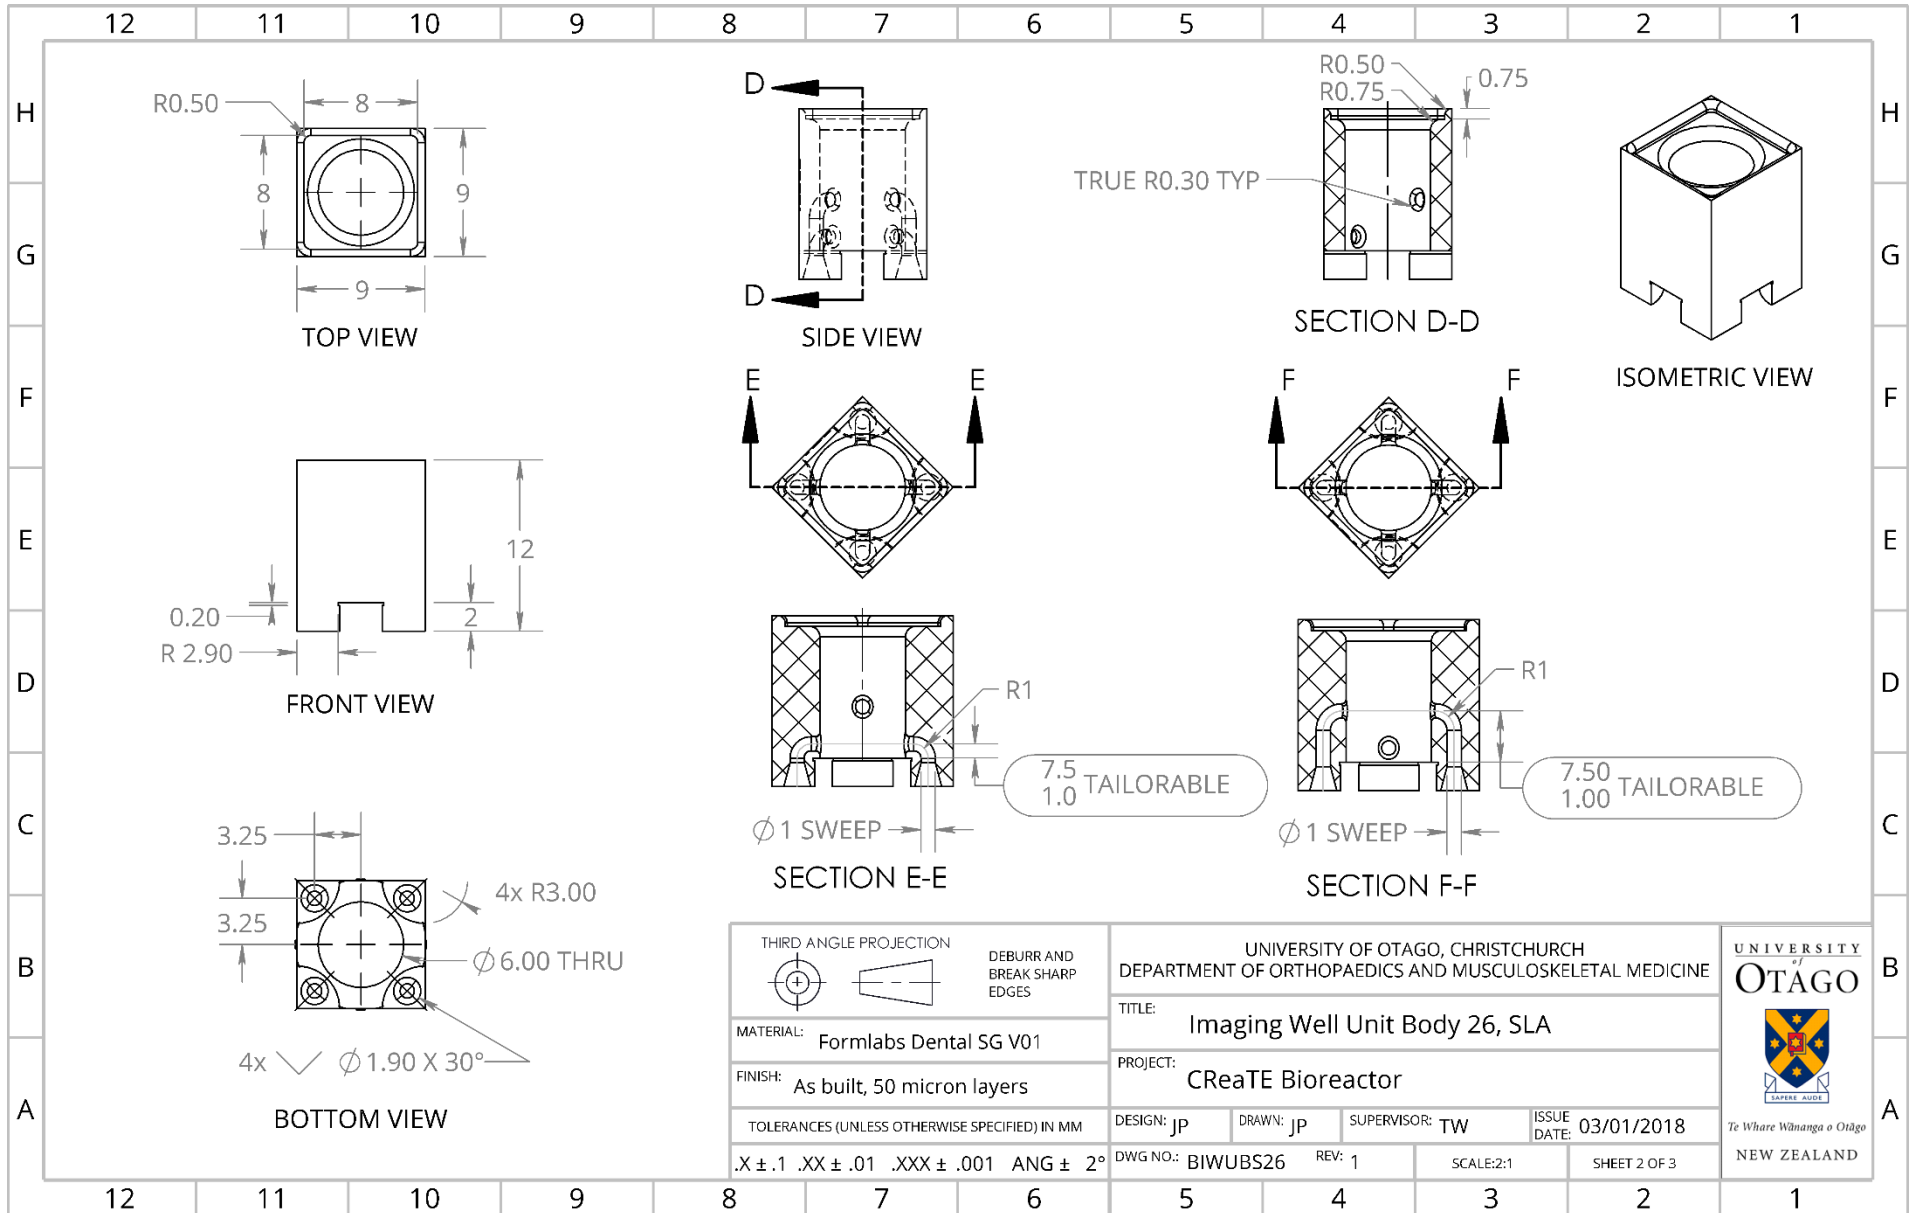

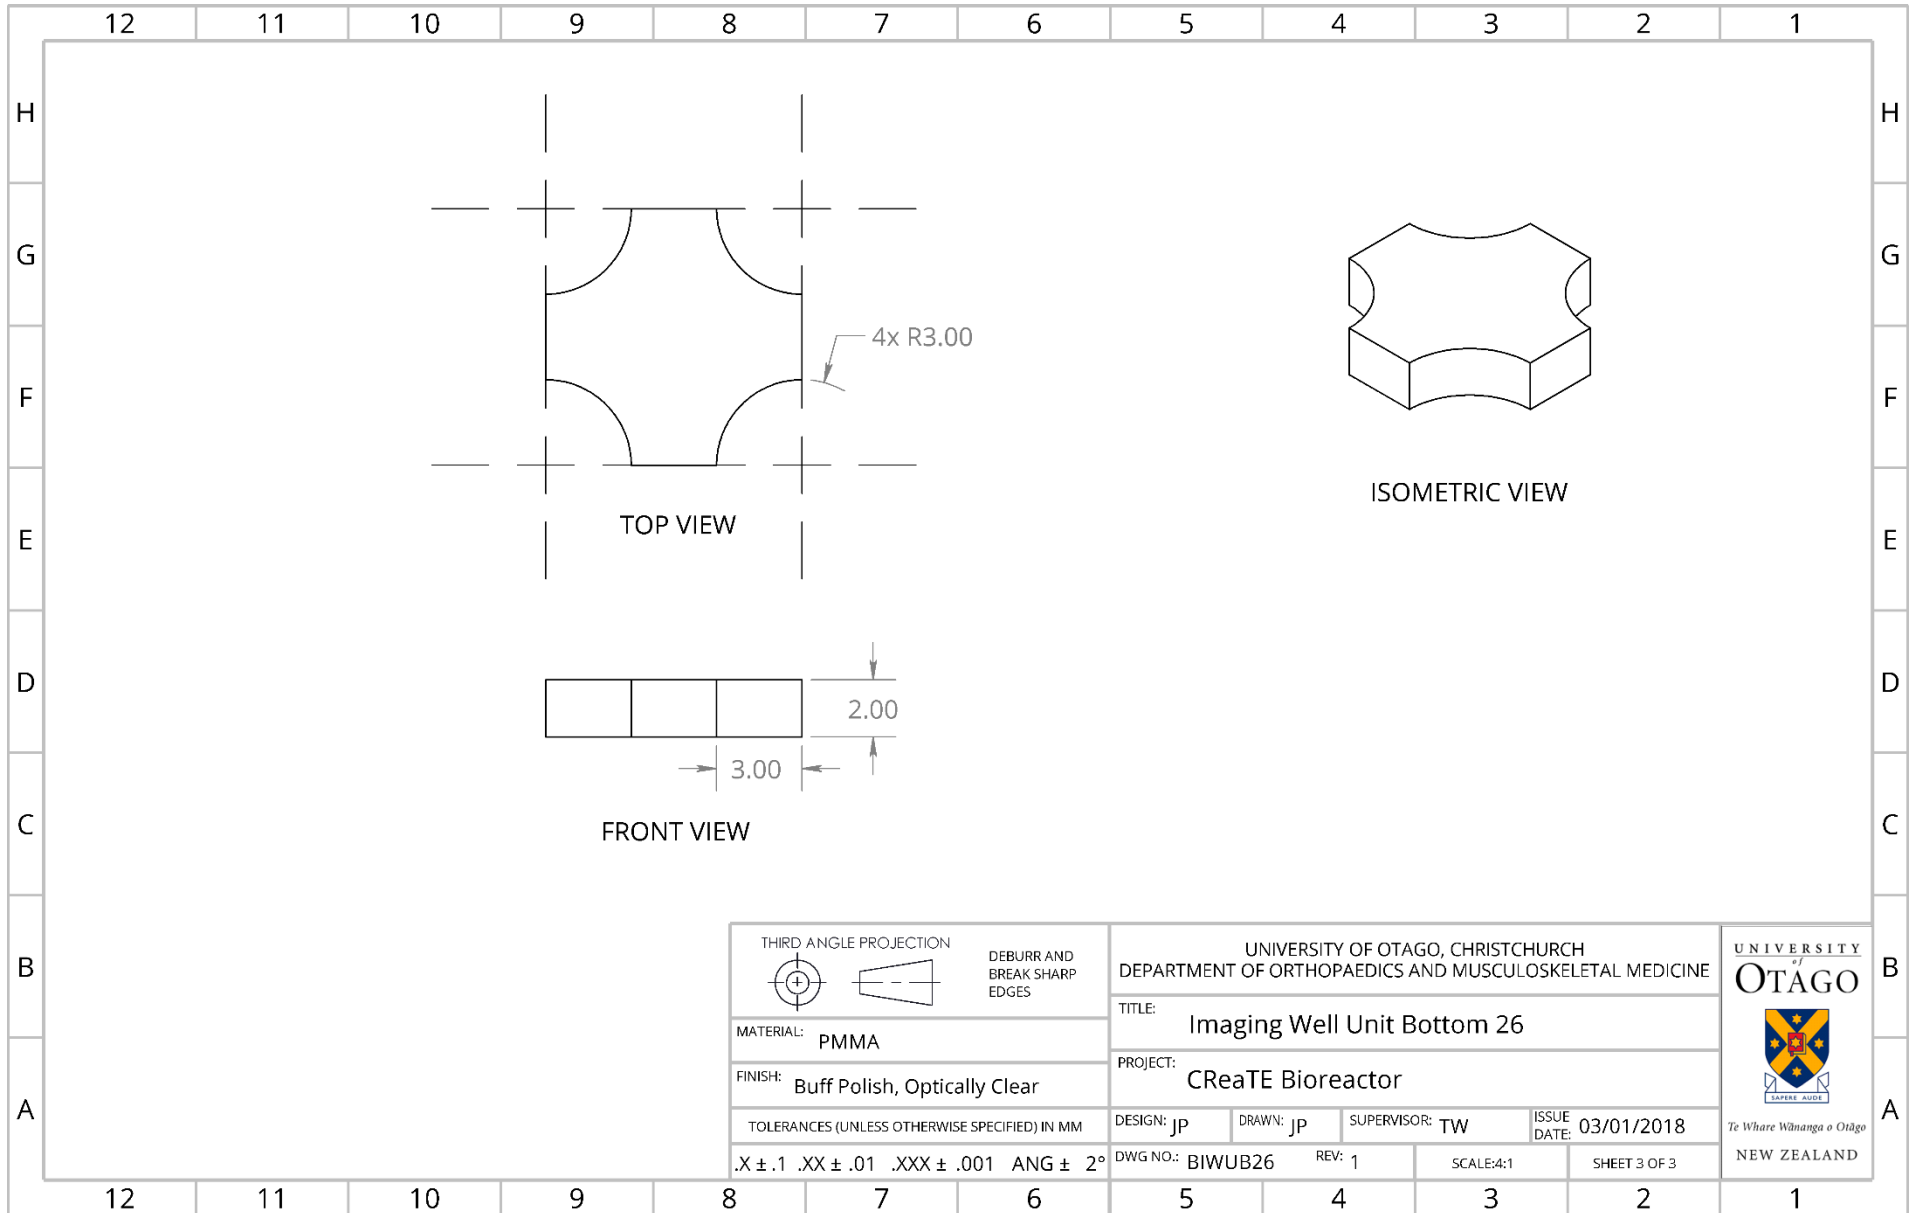

|                                                                                      |  |                                    |
|--------------------------------------------------------------------------------------|--|------------------------------------|
| THIRD ANGLE PROJECTION                                                               |  | DEBURR AND<br>BREAK SHARP<br>EDGES |
| 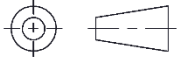 |  |                                    |
| MATERIAL: PMMA                                                                       |  |                                    |
| FINISH: Buff Polish, Optically Clear                                                 |  |                                    |
| TOLERANCES (UNLESS OTHERWISE SPECIFIED) IN MM                                        |  |                                    |
| .X ± .1 .XX ± .01 .XXX ± .001 ANG ± 2°                                               |  |                                    |

|                                                                                              |           |                |                        |
|----------------------------------------------------------------------------------------------|-----------|----------------|------------------------|
| UNIVERSITY OF OTAGO, CHRISTCHURCH<br>DEPARTMENT OF ORTHOPAEDICS AND MUSCULOSKELETAL MEDICINE |           |                |                        |
| TITLE: Imaging Well Unit Bottom 26                                                           |           |                |                        |
| PROJECT: CReaTE Bioreactor                                                                   |           |                |                        |
| DESIGN: JP                                                                                   | DRAWN: JP | SUPERVISOR: TW | ISSUE DATE: 03/01/2018 |
| DWG NO.: BIWUB26                                                                             | REV: 1    | SCALE: 4:1     | SHEET 3 OF 3           |

UNIVERSITY  
of  
**OTAGO**



*Te Whare Wānanga o Ōtago*  
NEW ZEALAND

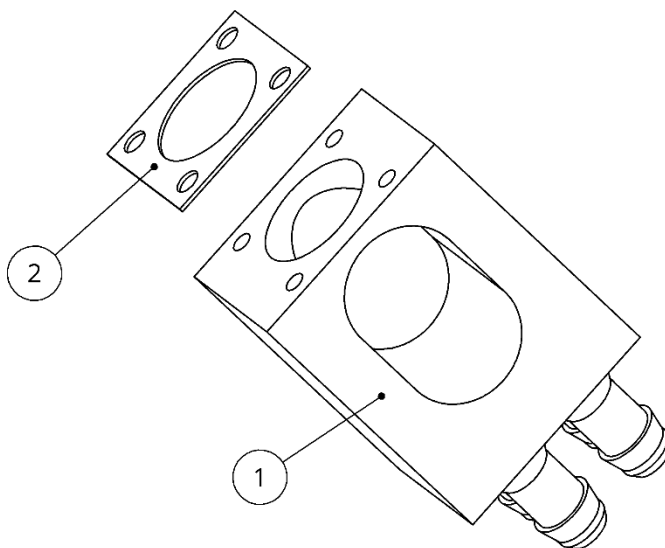

EXPLODED VIEW

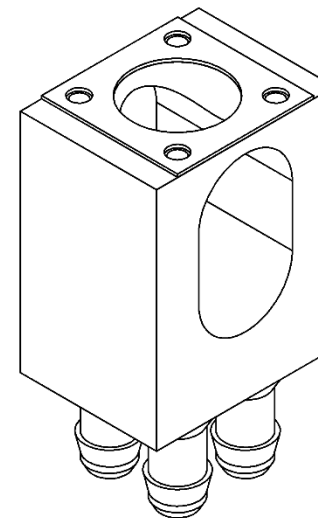

ASSEMBLED  
ISOMETRIC VIEW

| ID | Part                                 | Quantity |
|----|--------------------------------------|----------|
| 1  | Dock Medial Panel 04, Well Unit Body | 1        |
| 2  | Media Gasket 01, Well Unit           | 1        |

|                                               |           |                                    |
|-----------------------------------------------|-----------|------------------------------------|
| THIRD ANGLE PROJECTION                        |           | DEBURR AND<br>BREAK SHARP<br>EDGES |
|                                               |           |                                    |
| MATERIAL: N/A                                 |           |                                    |
| FINISH: N/A                                   |           |                                    |
| TOLERANCES (UNLESS OTHERWISE SPECIFIED) IN MM |           |                                    |
| .X ± .1                                       | .XX ± .01 | .XXX ± .001 ANG ± 2°               |

|                                                                                              |           |                |                        |
|----------------------------------------------------------------------------------------------|-----------|----------------|------------------------|
| UNIVERSITY OF OTAGO, CHRISTCHURCH<br>DEPARTMENT OF ORTHOPAEDICS AND MUSCULOSKELETAL MEDICINE |           |                |                        |
| TITLE: Dock Media Panel 04, Well Unit, SLA                                                   |           |                |                        |
| PROJECT: CReaTE Bioreactor                                                                   |           |                |                        |
| DESIGN: jp                                                                                   | DRAWN: jp | SUPERVISOR: TW | ISSUE DATE: 03/01/2018 |
| DWG NO.: BMPUS04                                                                             | REV: 1    | SCALE:3:1      | SHEET 1 OF 3           |

|                                         |
|-----------------------------------------|
| UNIVERSITY<br>of<br>OTAGO               |
|                                         |
| Te Whare Wānanga o Ōtago<br>NEW ZEALAND |



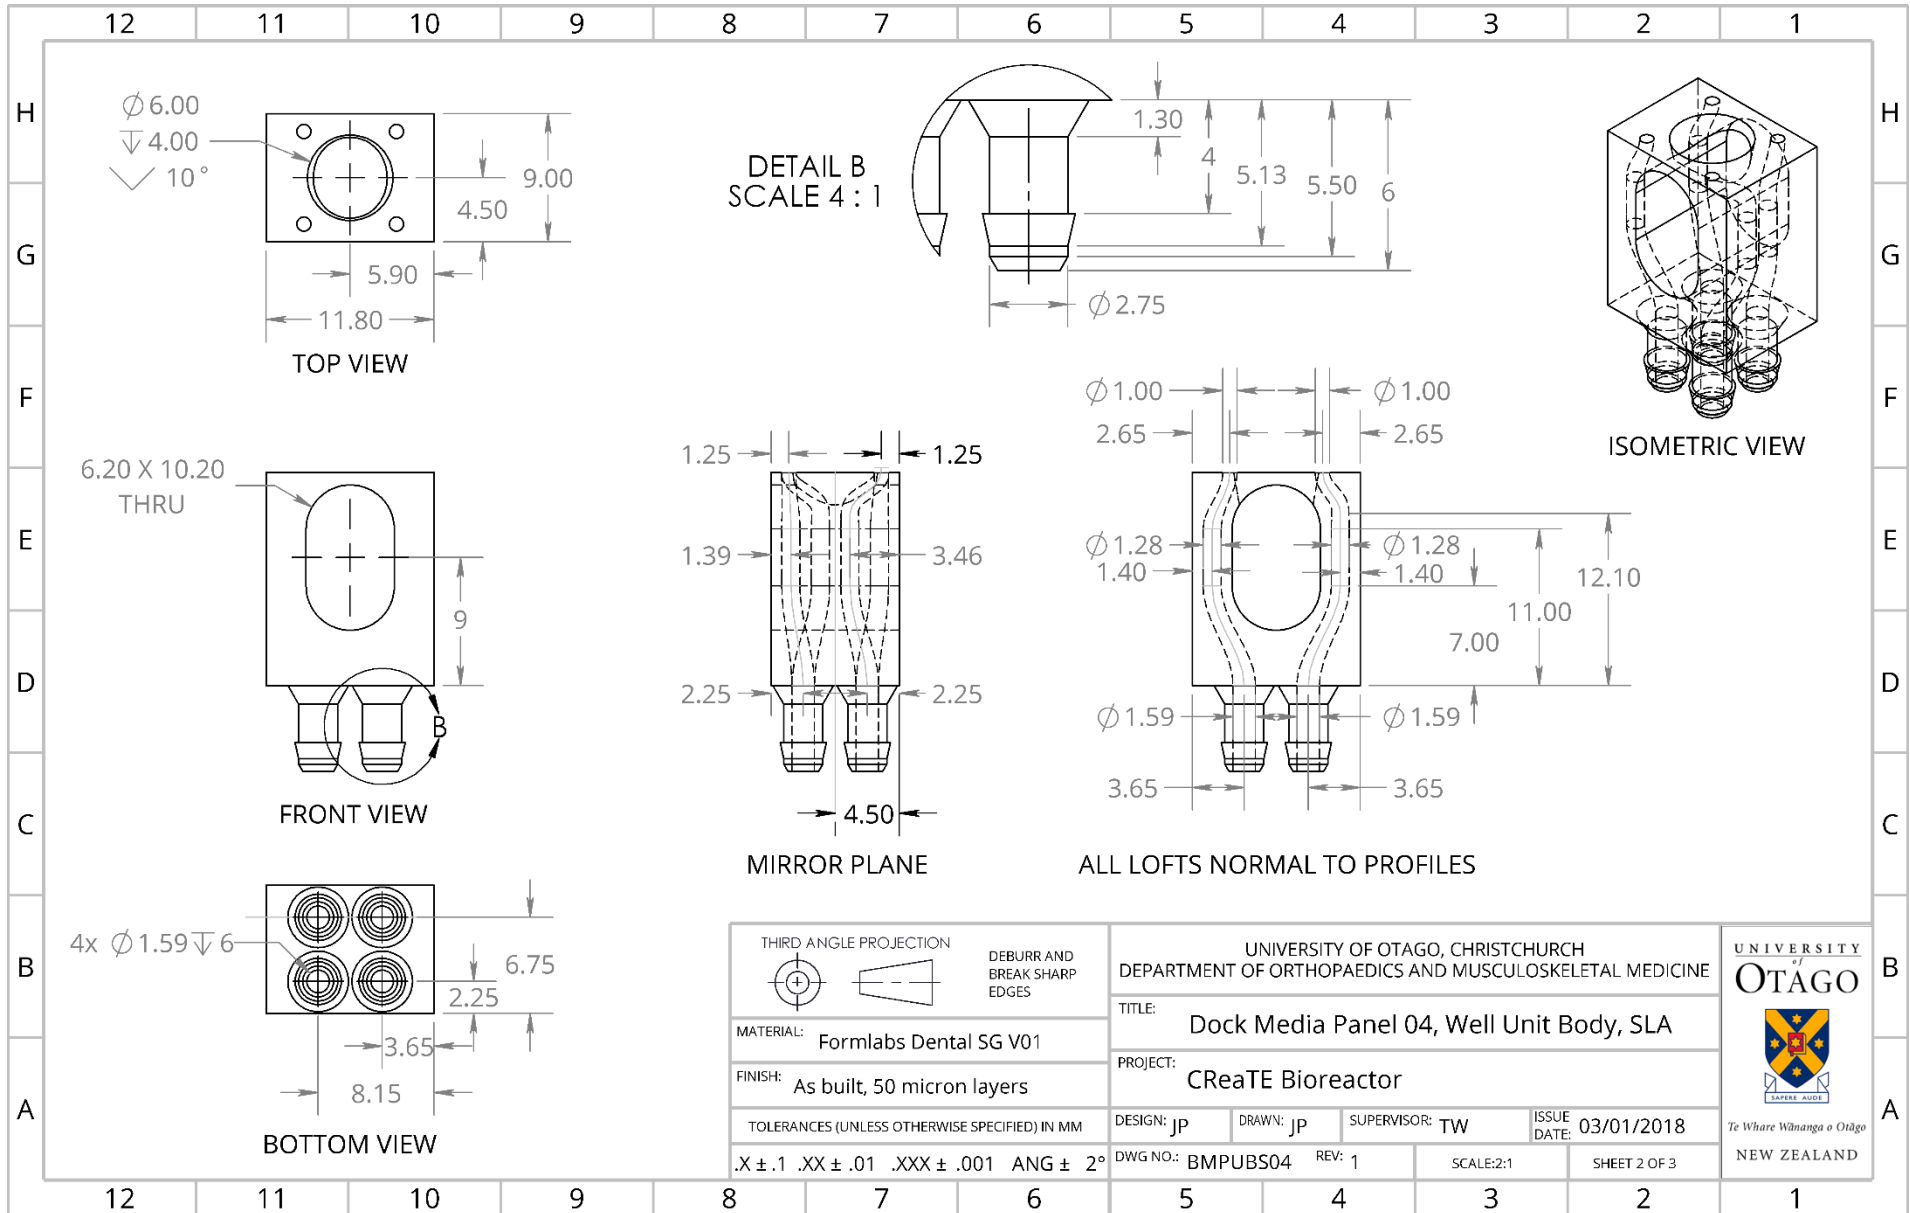

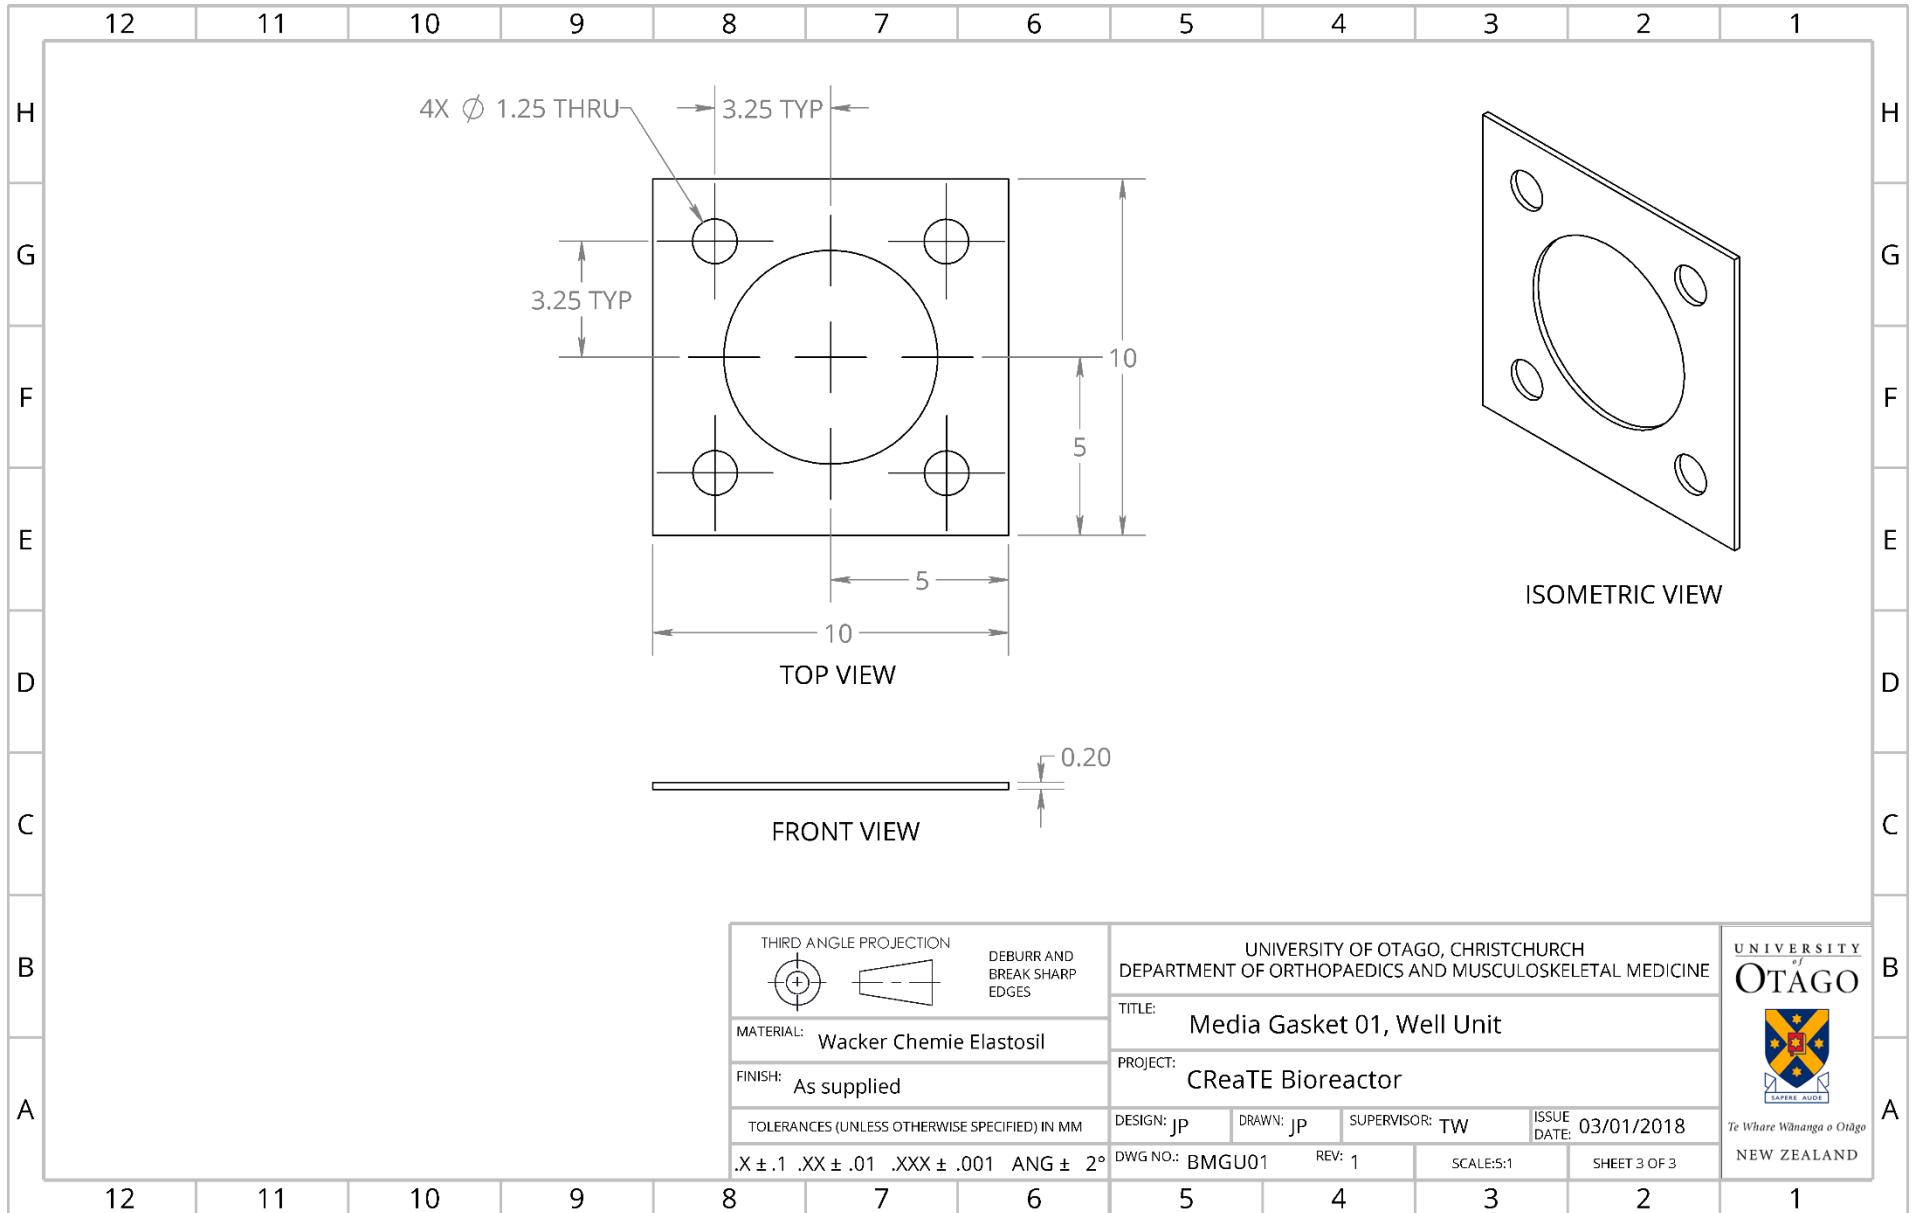

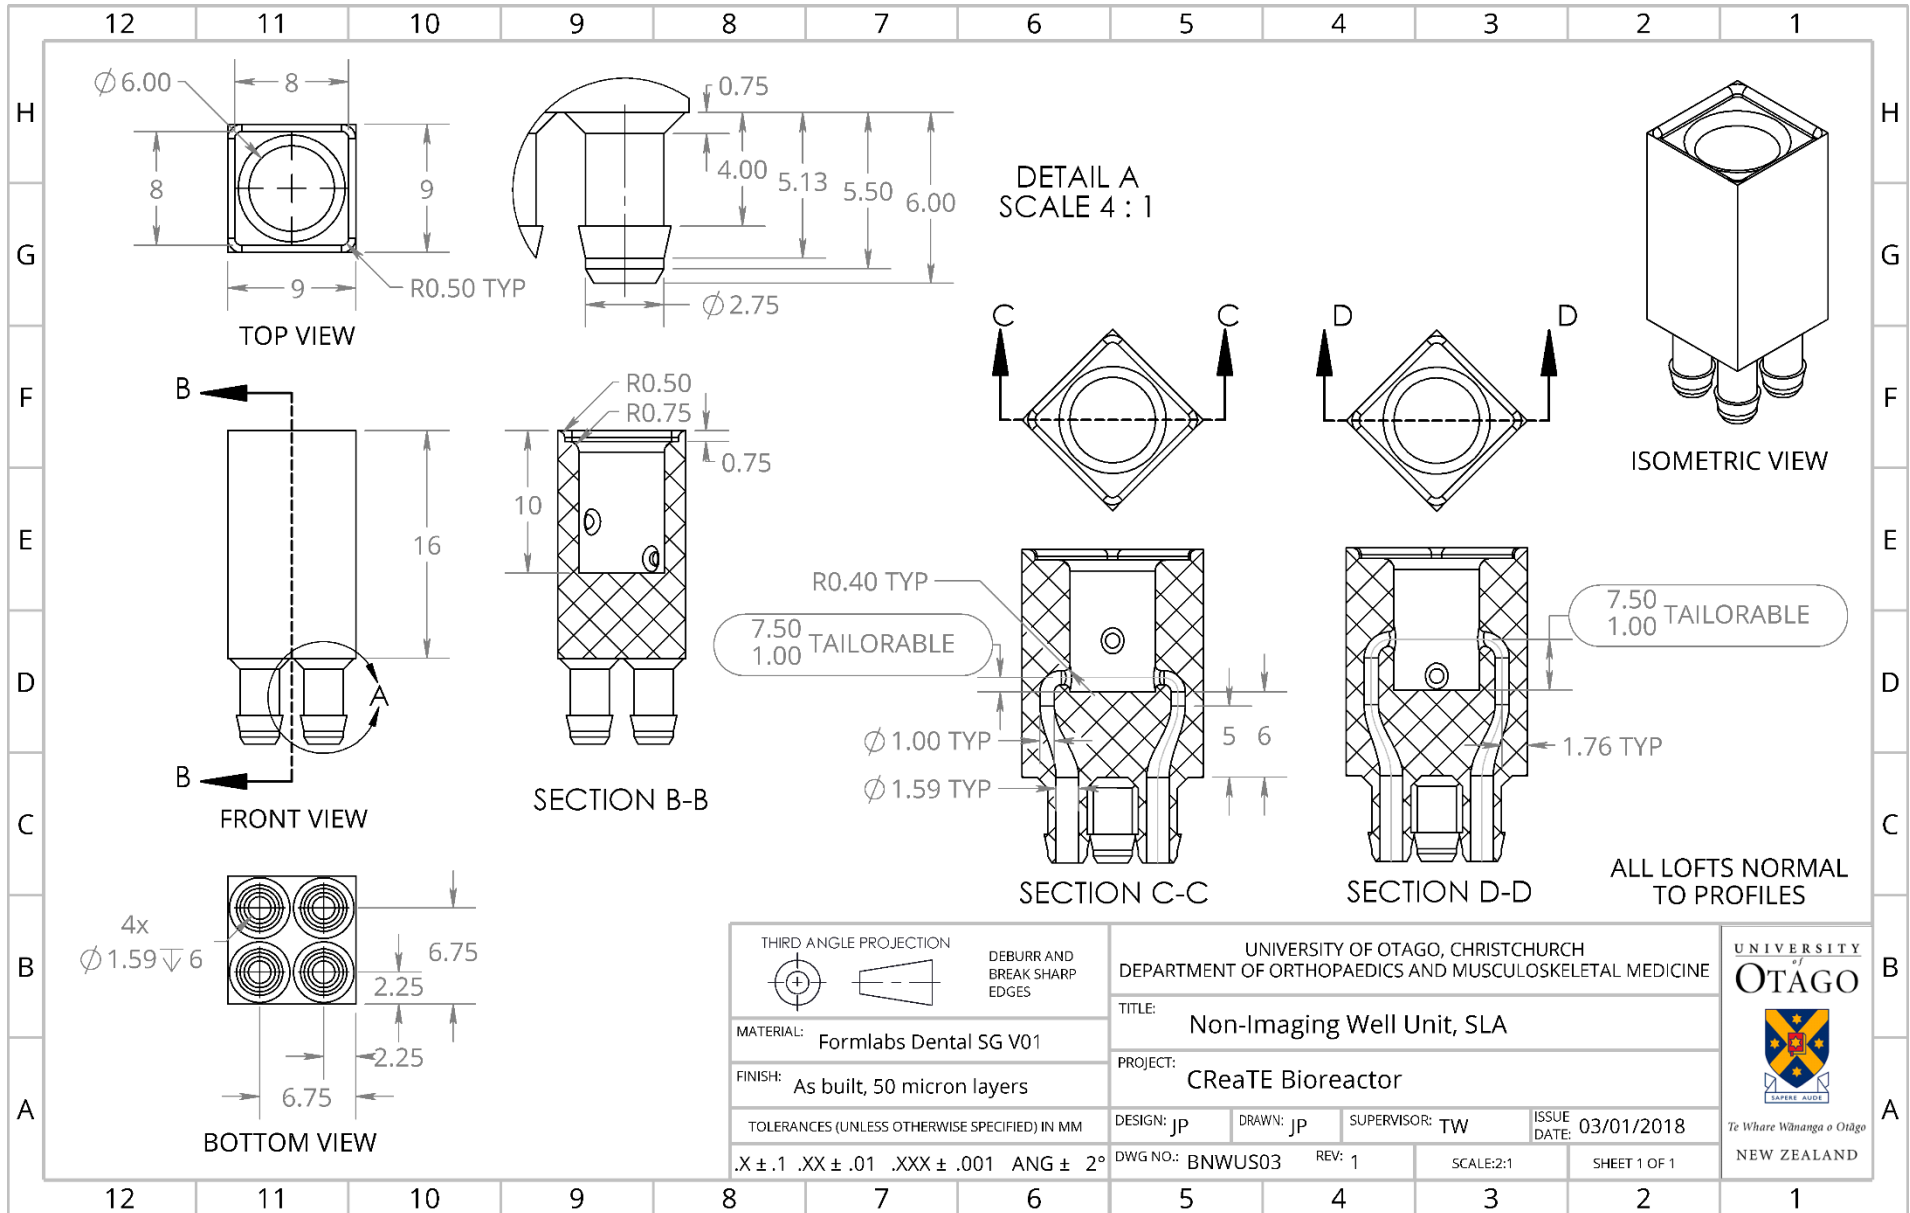

## 3-Well Culture Assemblies

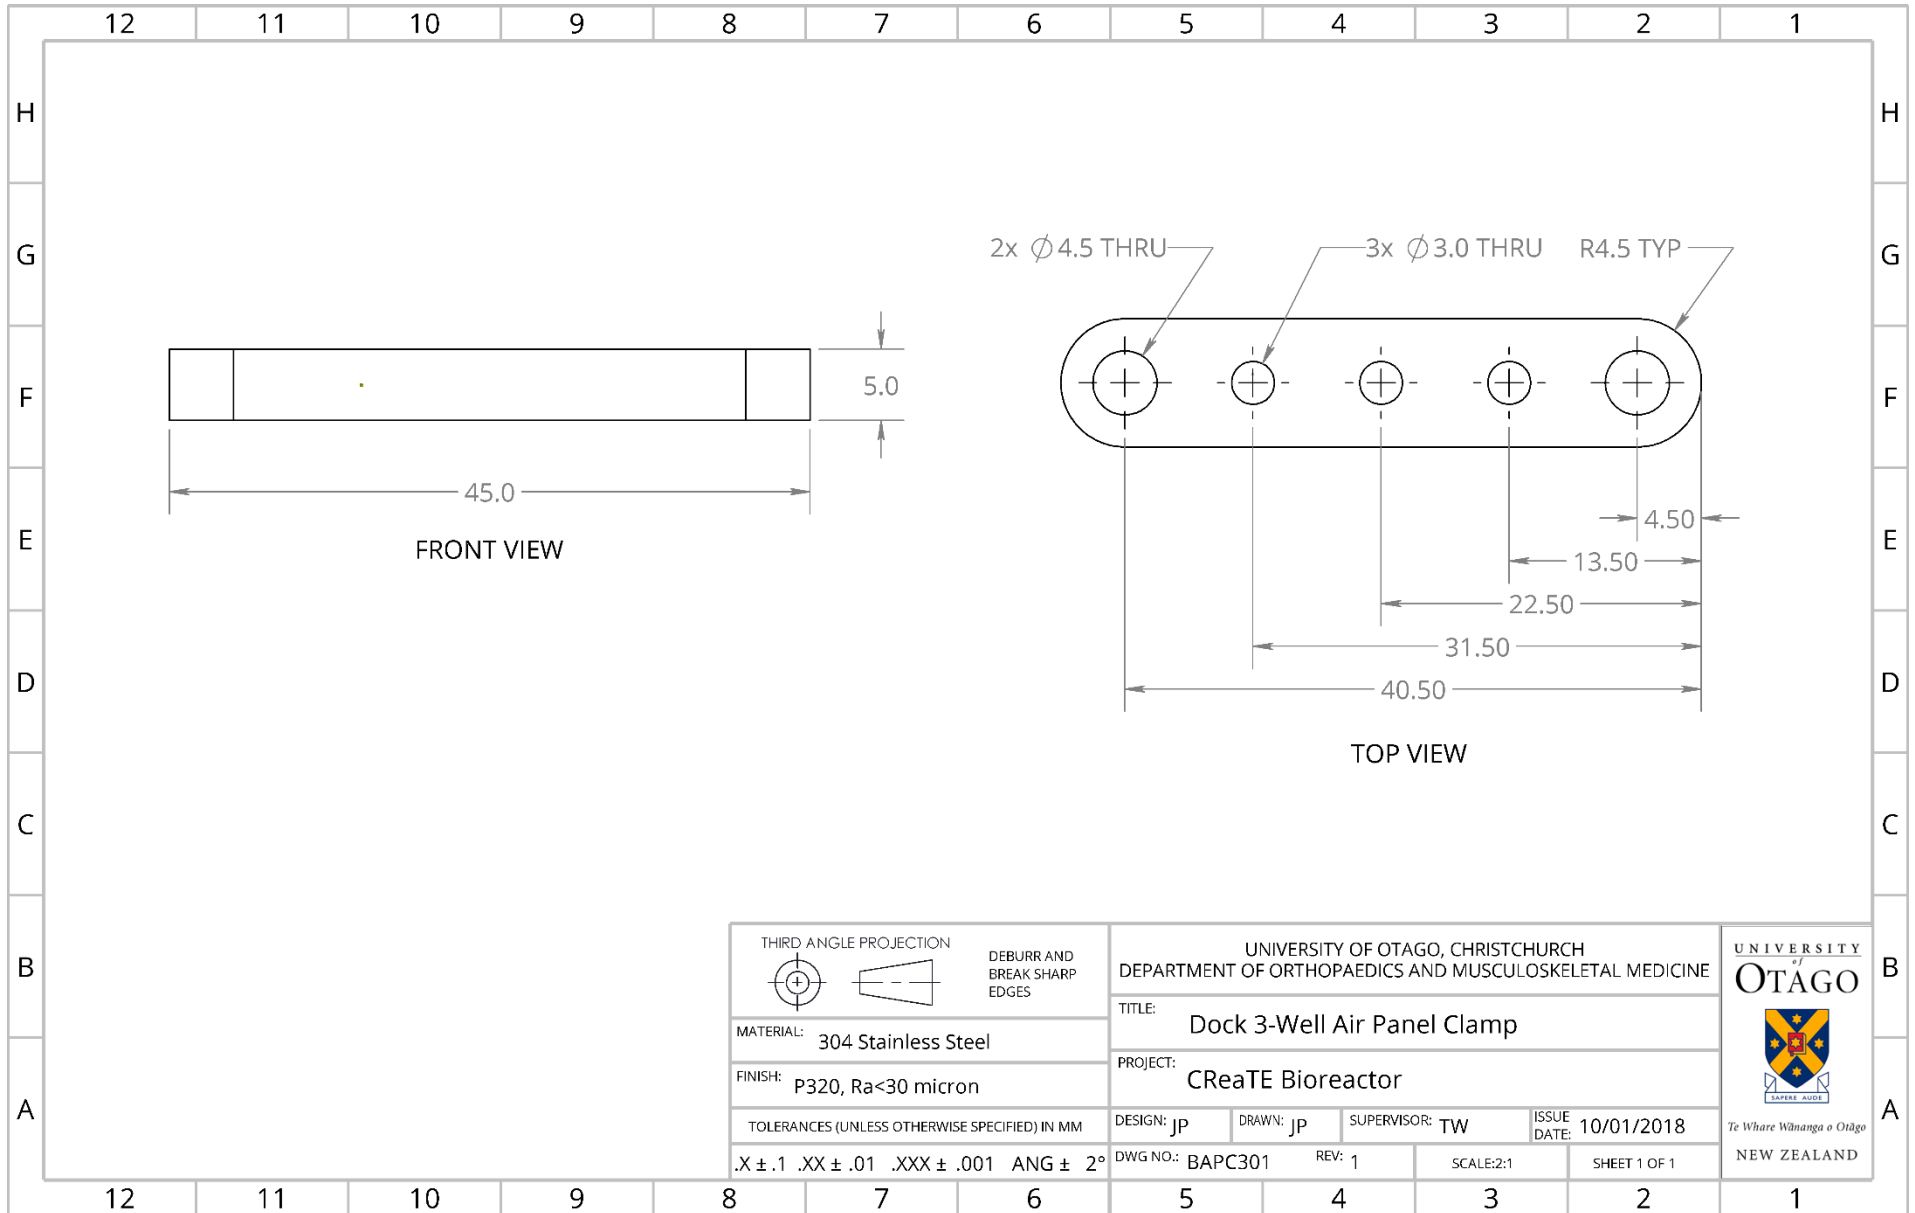

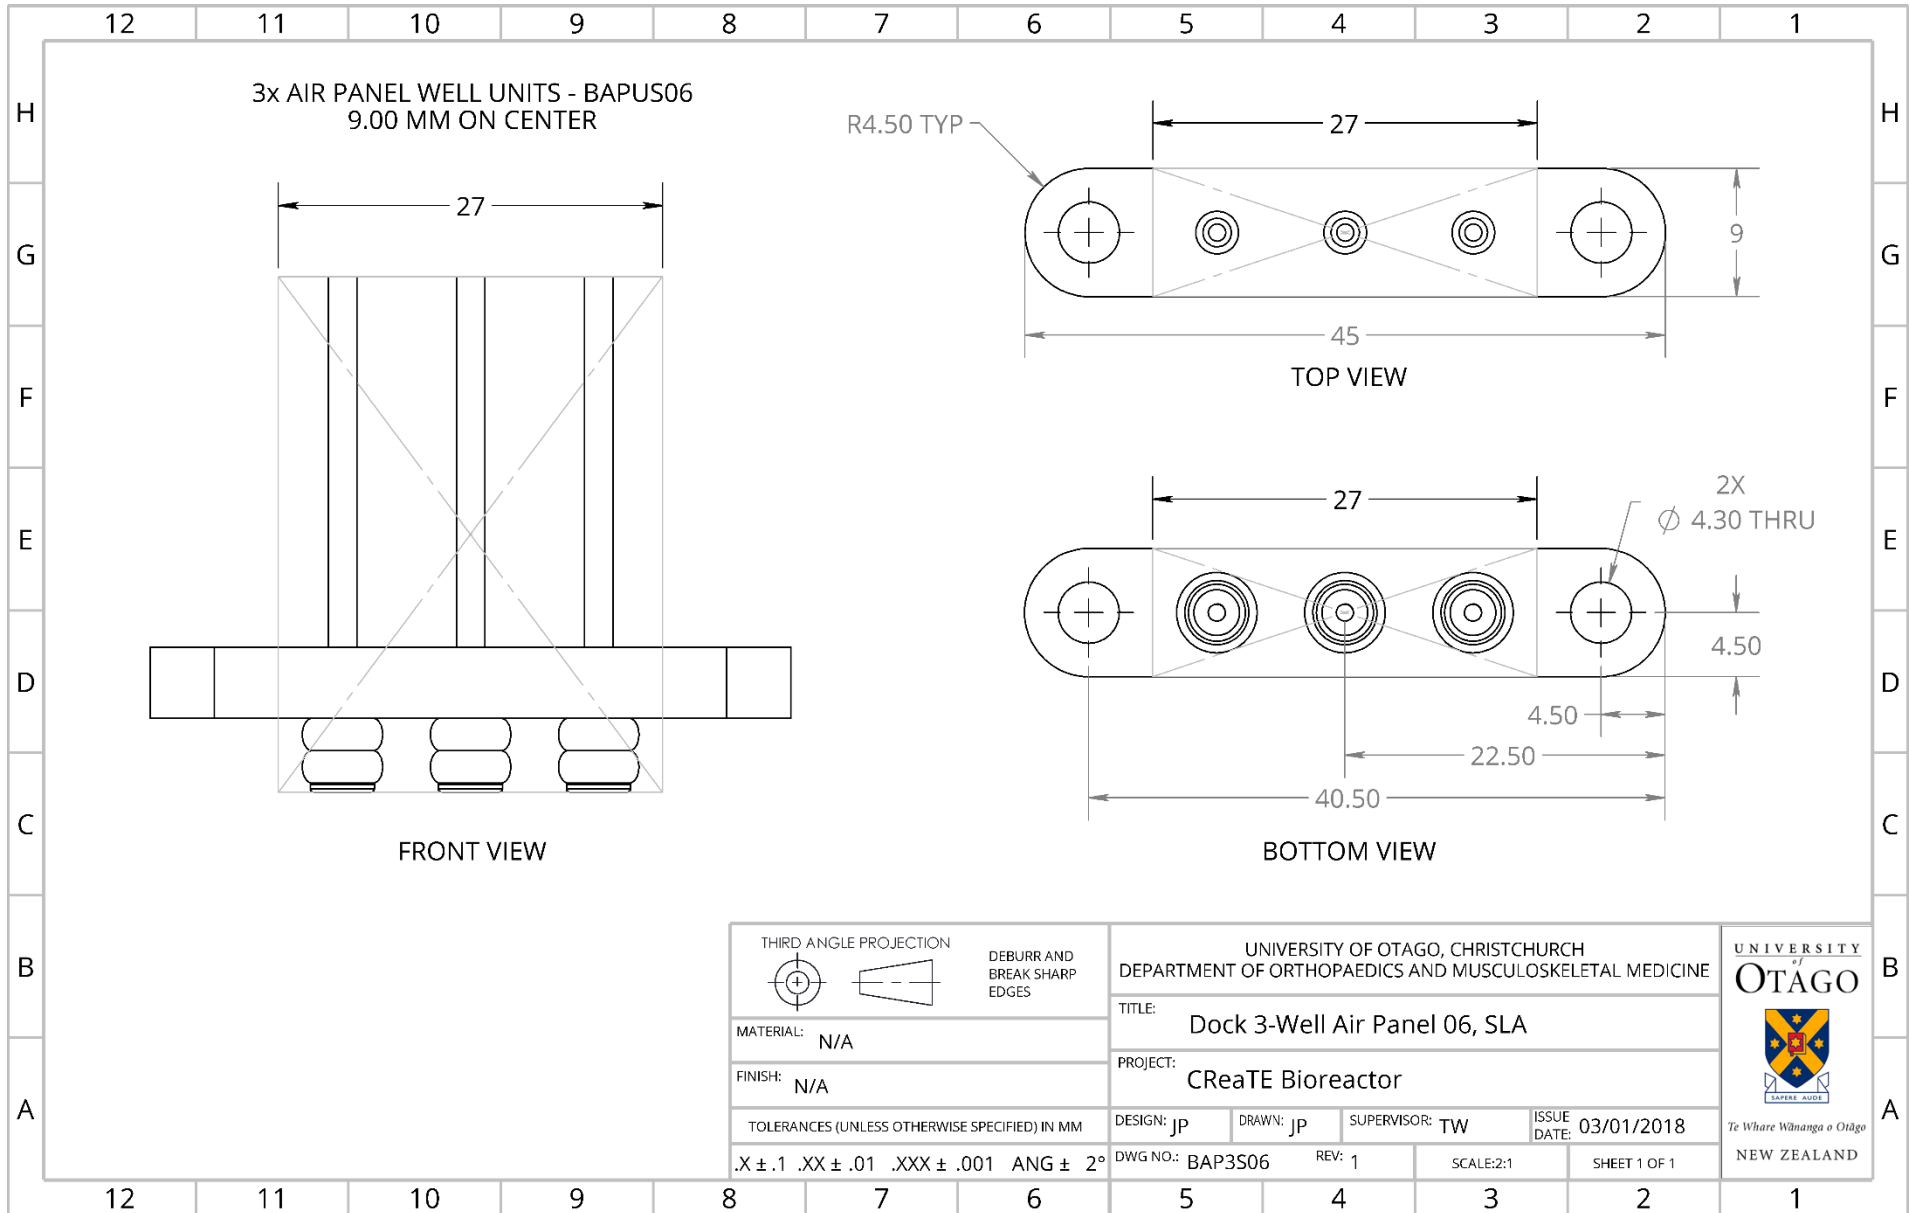

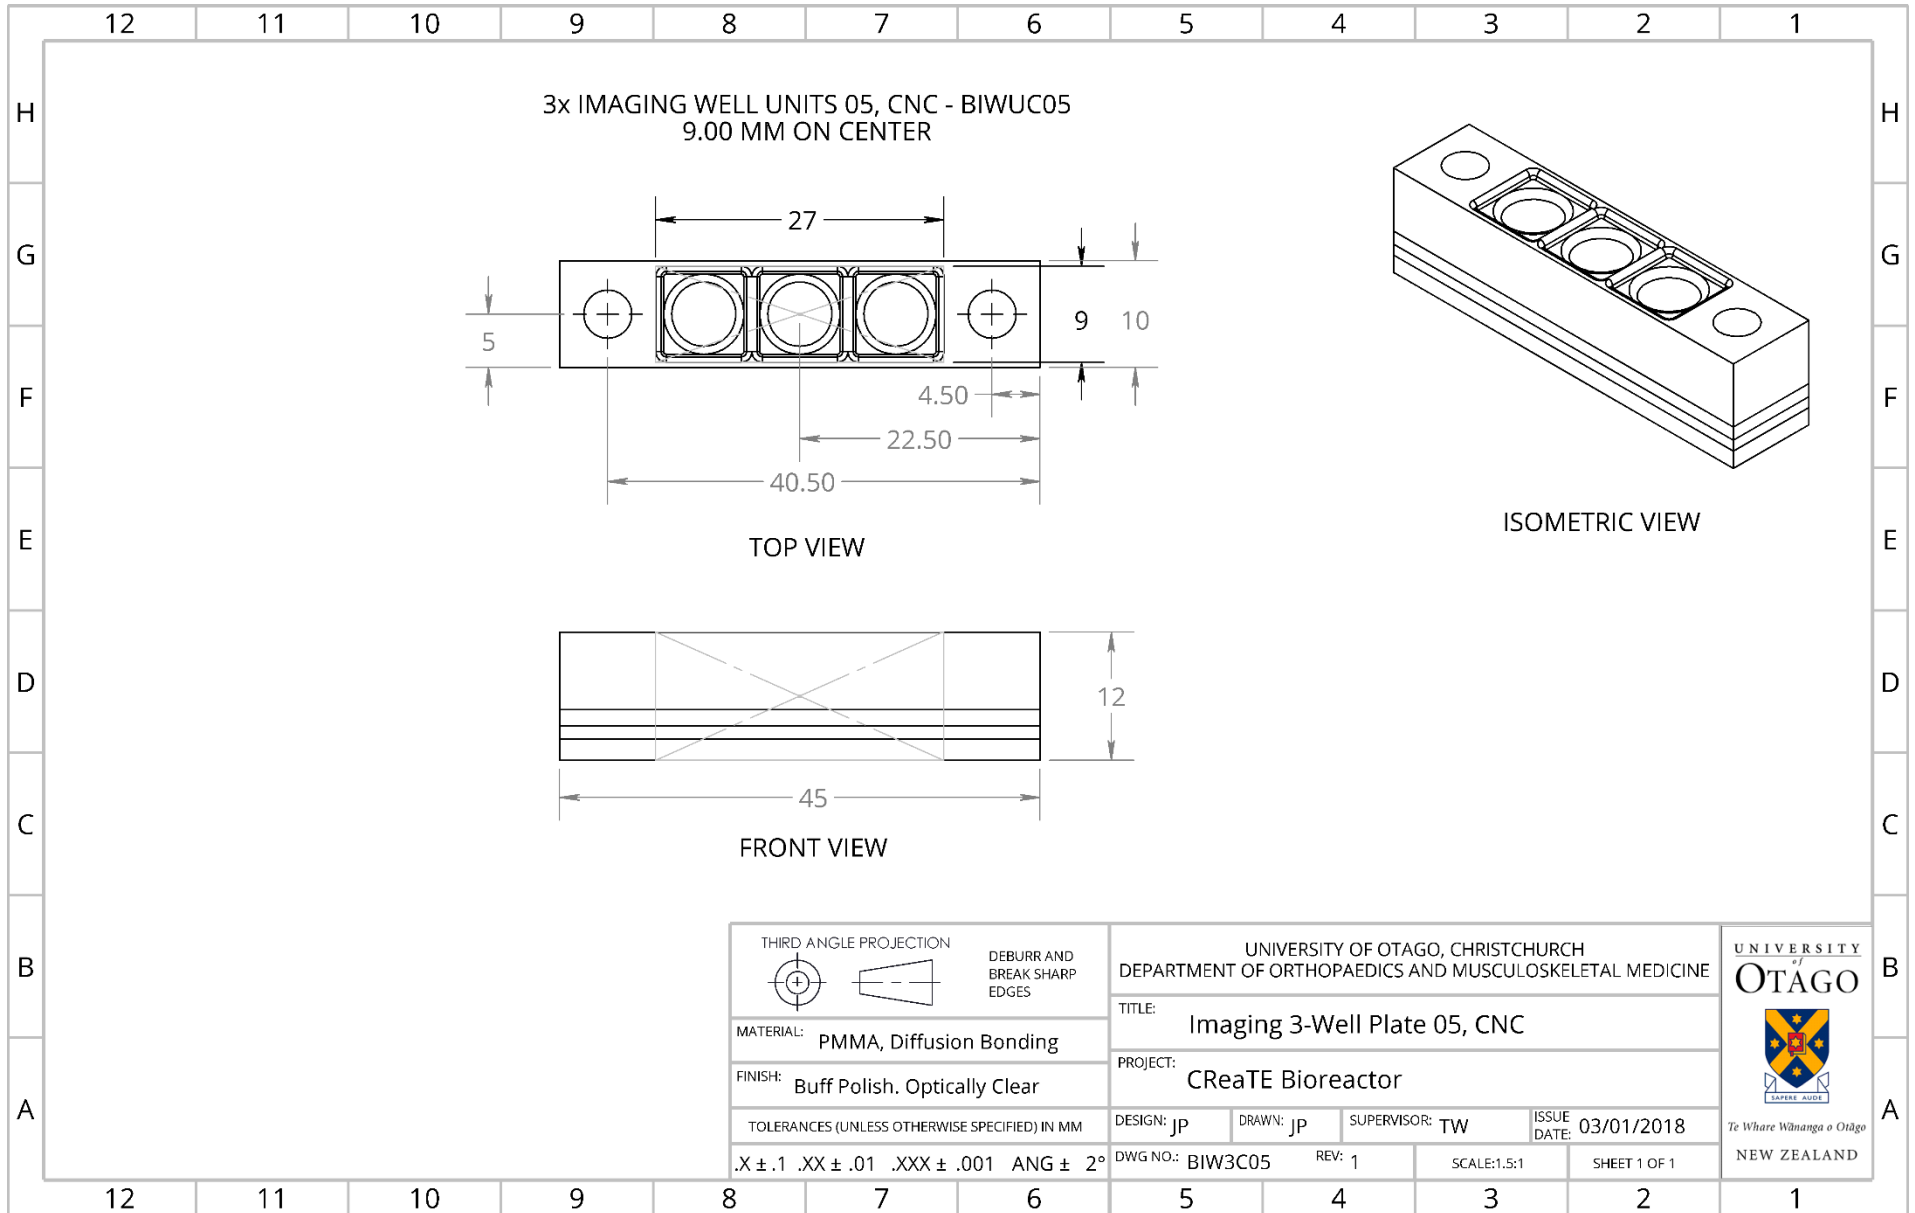

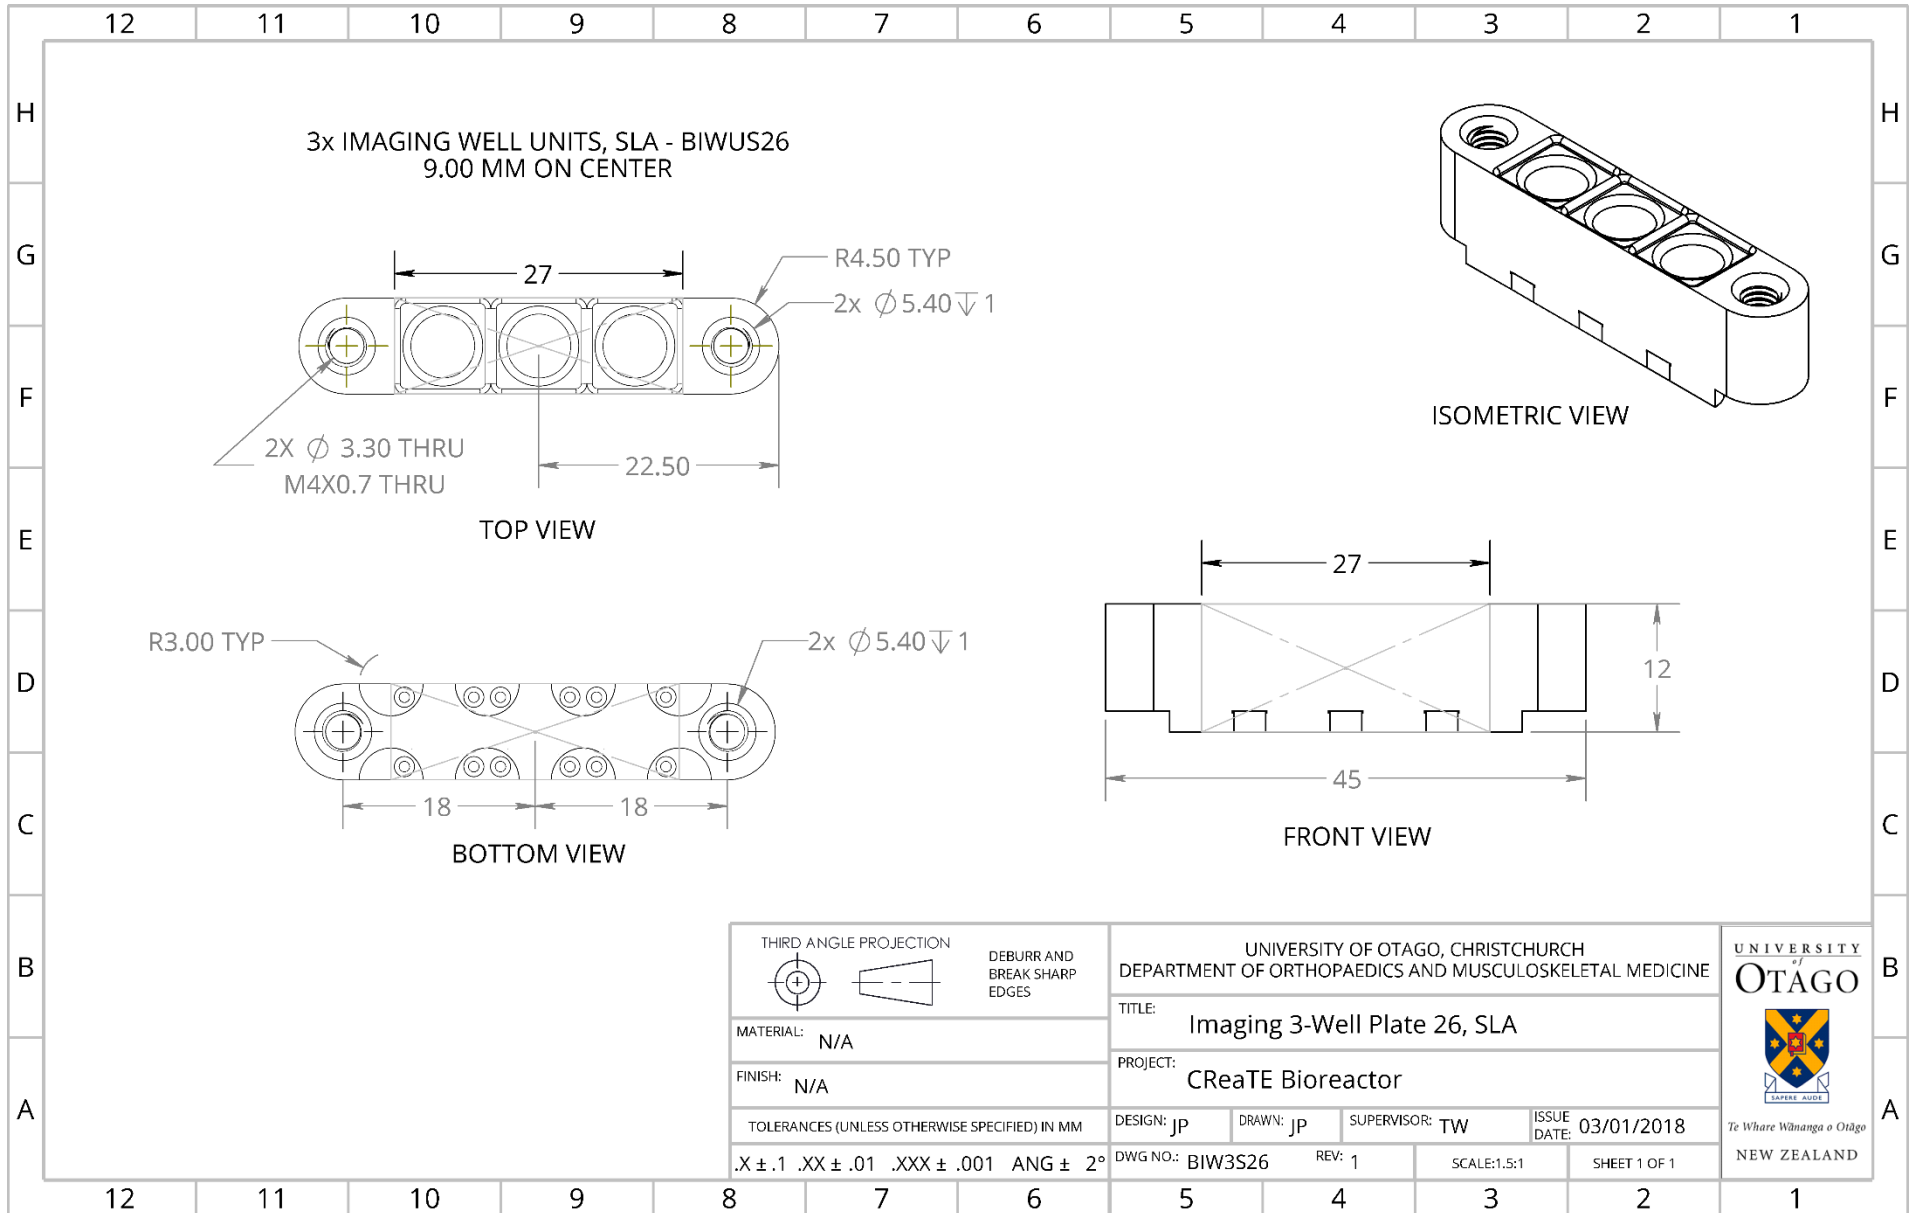



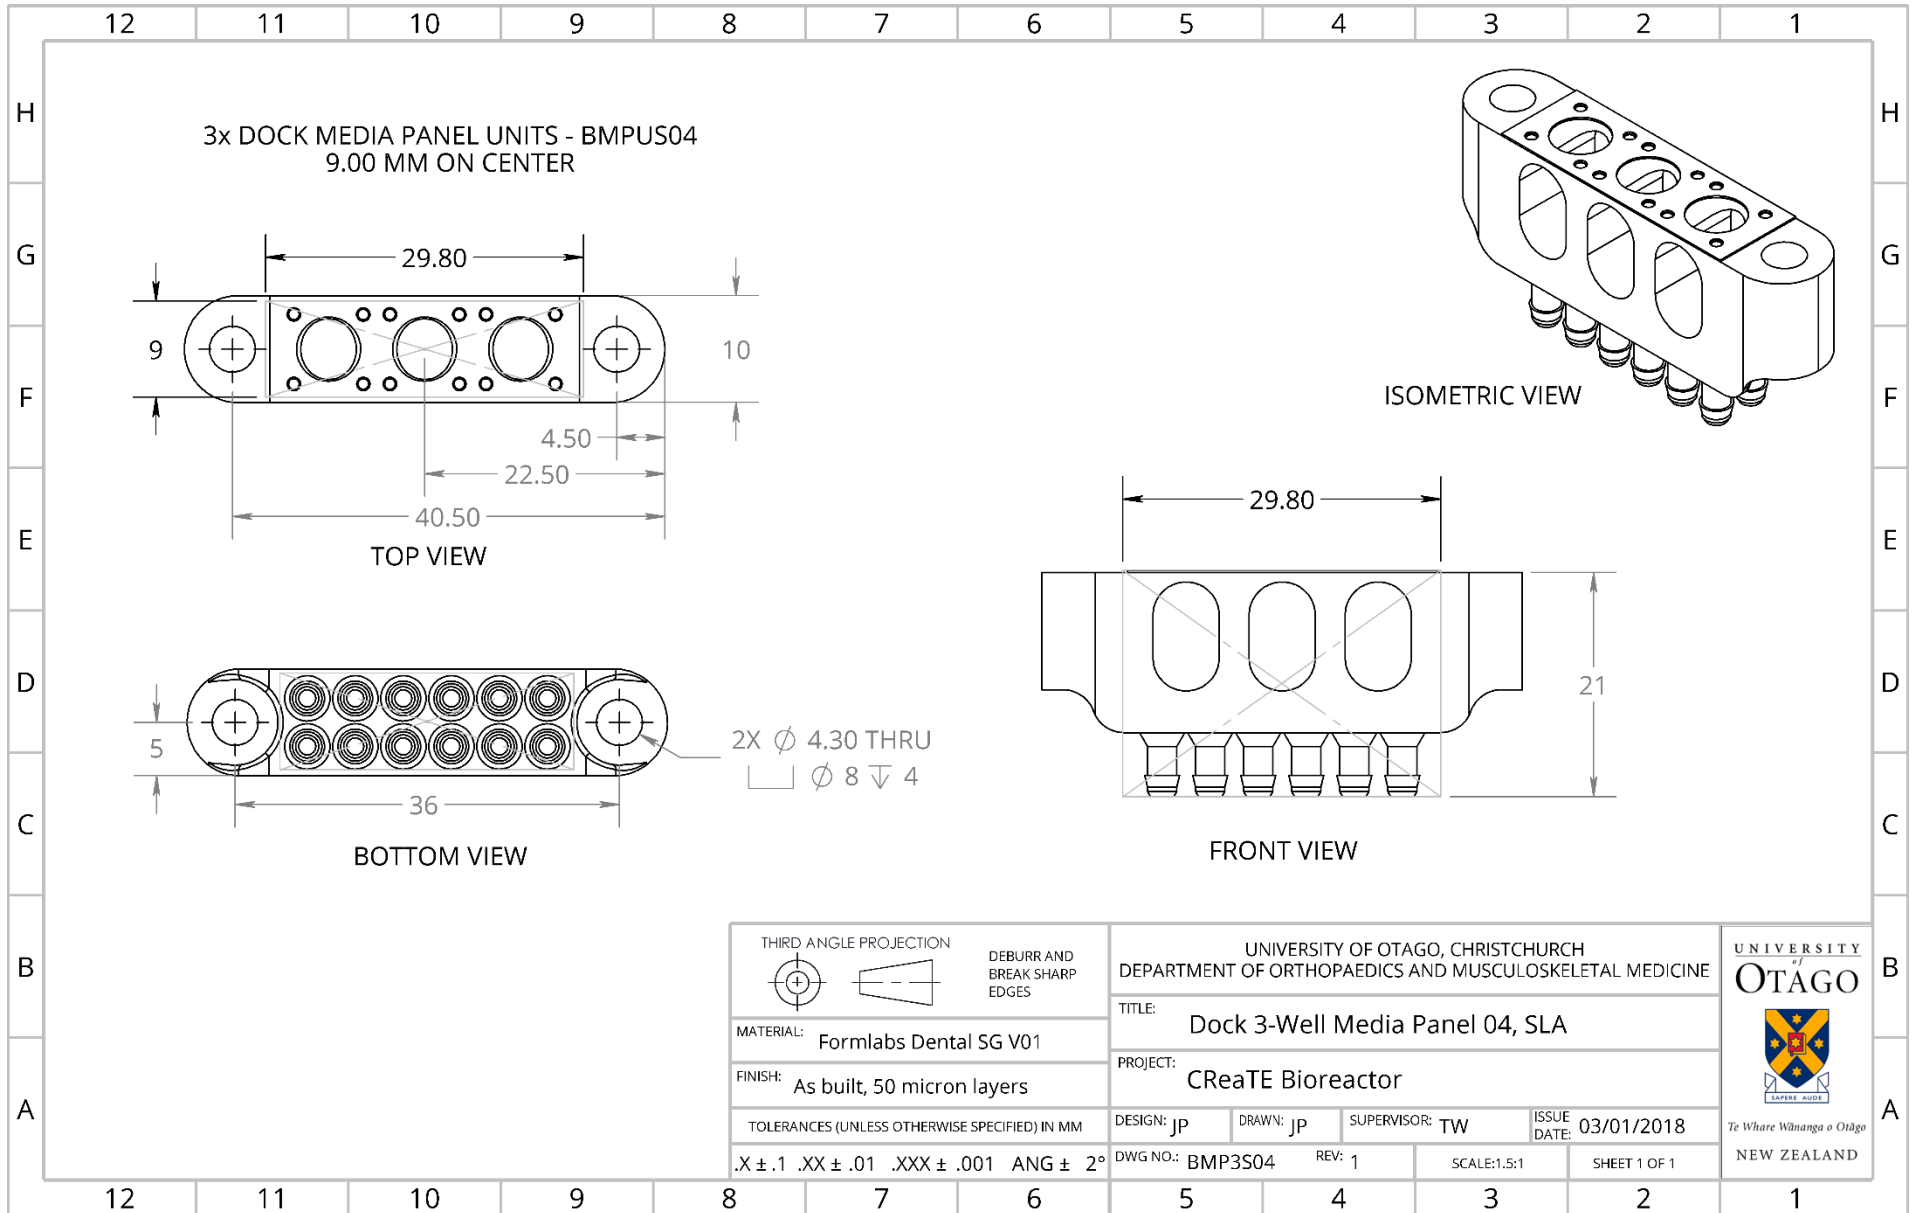

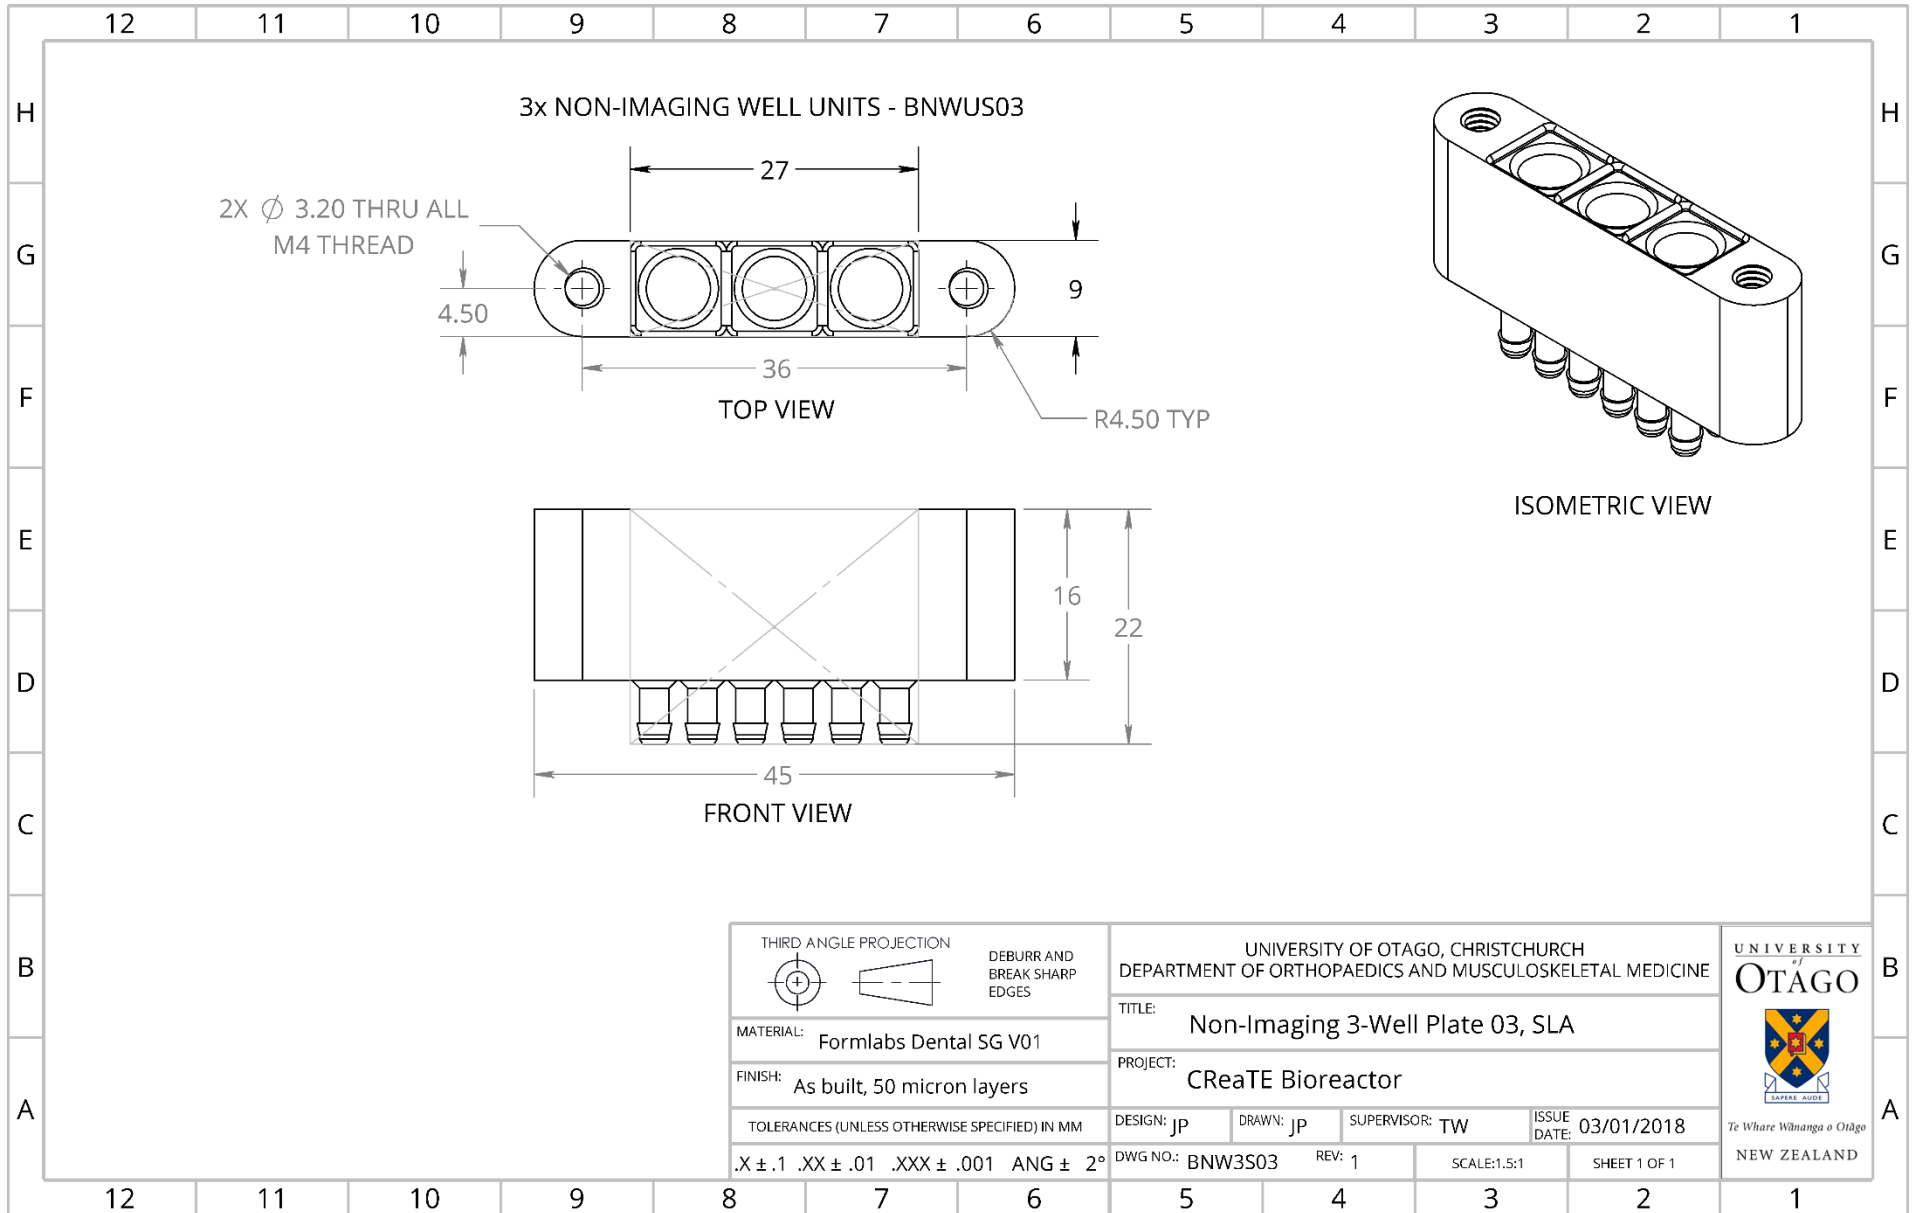

|                                               |  |                                    |
|-----------------------------------------------|--|------------------------------------|
| THIRD ANGLE PROJECTION                        |  | DEBURR AND<br>BREAK SHARP<br>EDGES |
|                                               |  |                                    |
| MATERIAL: Formlabs Dental SG V01              |  |                                    |
| FINISH: As built, 50 micron layers            |  |                                    |
| TOLERANCES (UNLESS OTHERWISE SPECIFIED) IN MM |  |                                    |
| .X ± .1 .XX ± .01 .XXX ± .001 ANG ± 2°        |  |                                    |

|                                                         |           |                |                        |
|---------------------------------------------------------|-----------|----------------|------------------------|
| UNIVERSITY OF OTAGO, CHRISTCHURCH                       |           |                |                        |
| DEPARTMENT OF ORTHOPAEDICS AND MUSCULOSKELETAL MEDICINE |           |                |                        |
| TITLE: Non-Imaging 3-Well Plate 03, SLA                 |           |                |                        |
| PROJECT: CReaTE Bioreactor                              |           |                |                        |
| DESIGN: jp                                              | DRAWN: jp | SUPERVISOR: TW | ISSUE DATE: 03/01/2018 |
| DWG NO.: BNW3S03                                        | REV: 1    | SCALE: 1.5:1   | SHEET 1 OF 1           |

UNIVERSITY  
of  
**OTAGO**

*Te Whare Wānanga o Ōtago*

NEW ZEALAND

## 96-Well Imaging

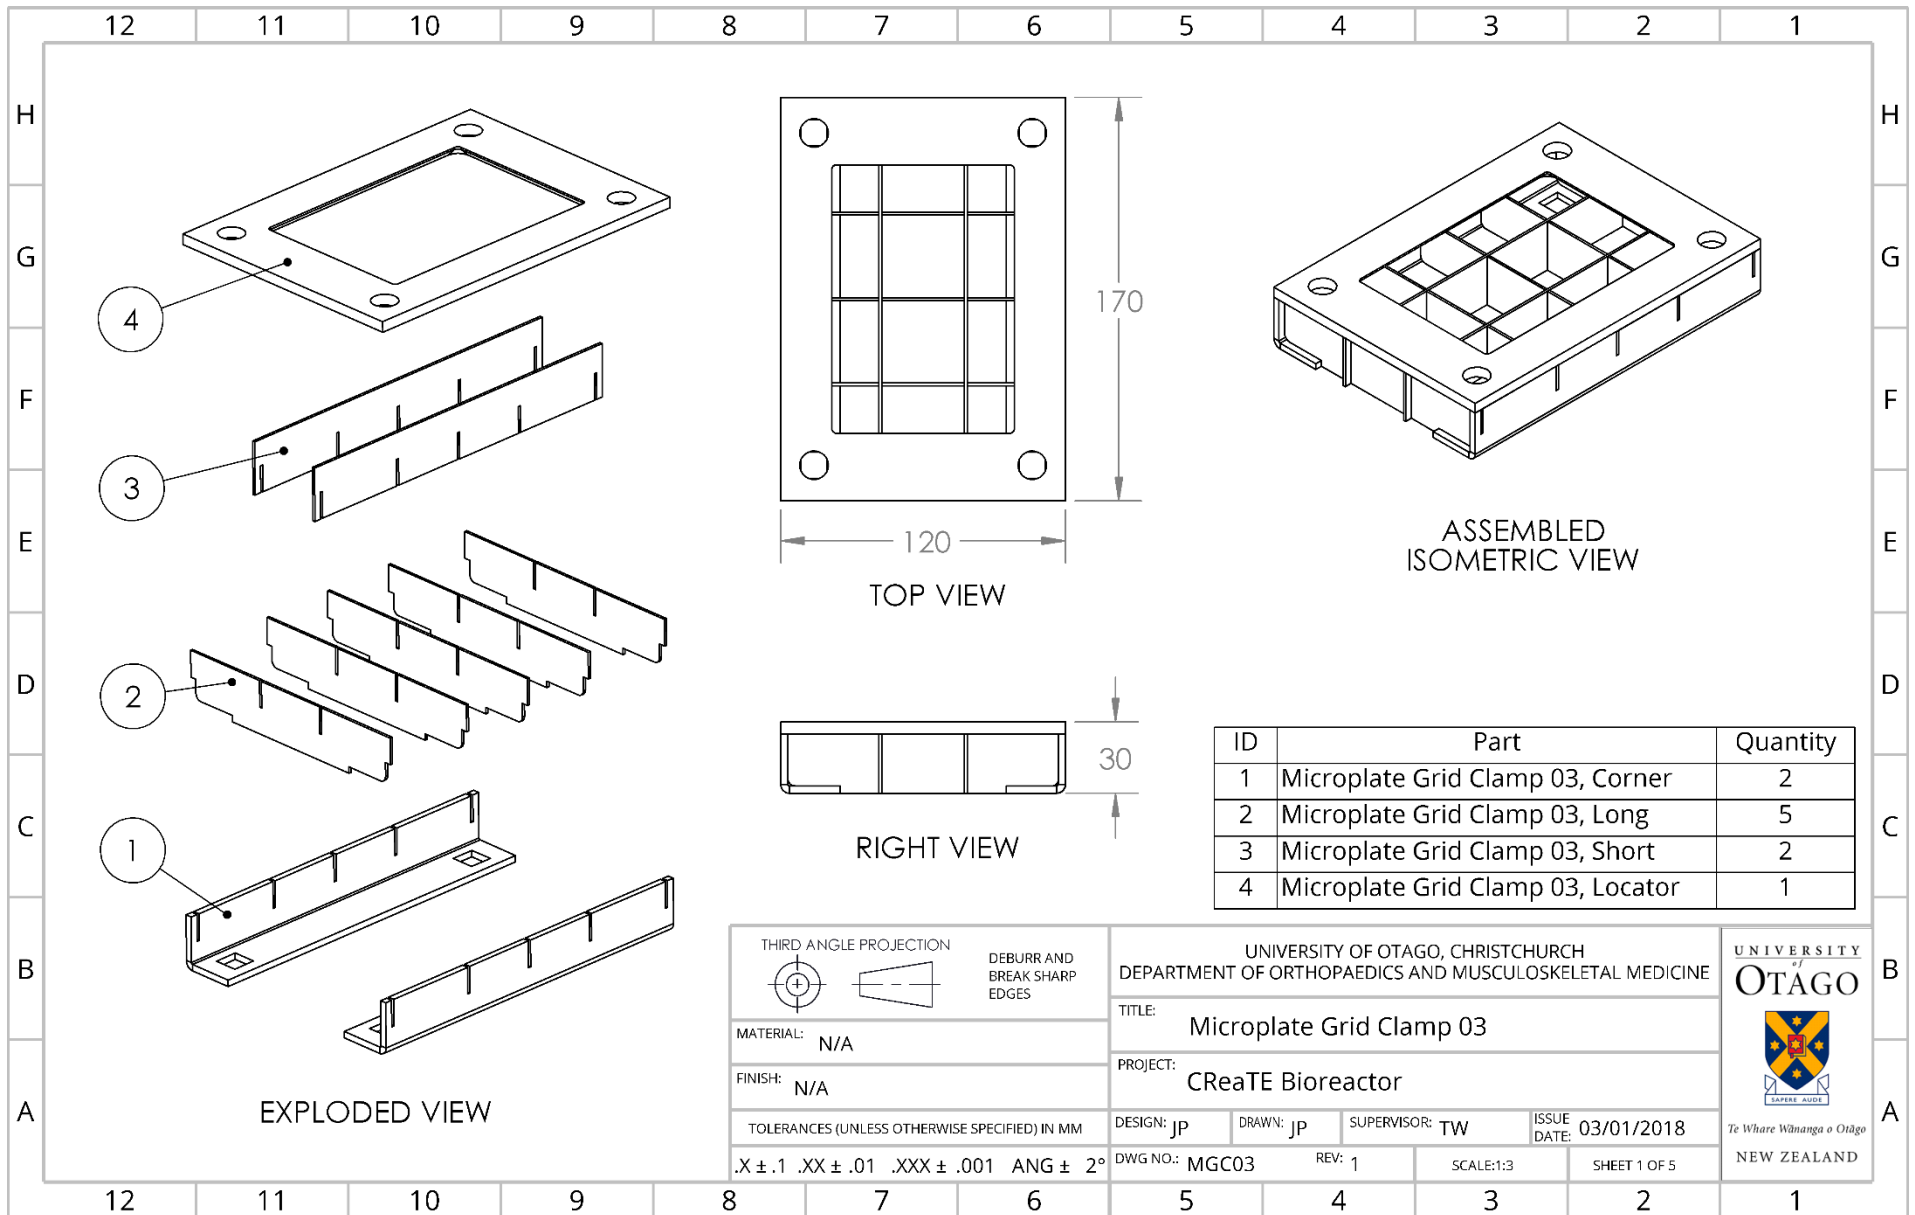

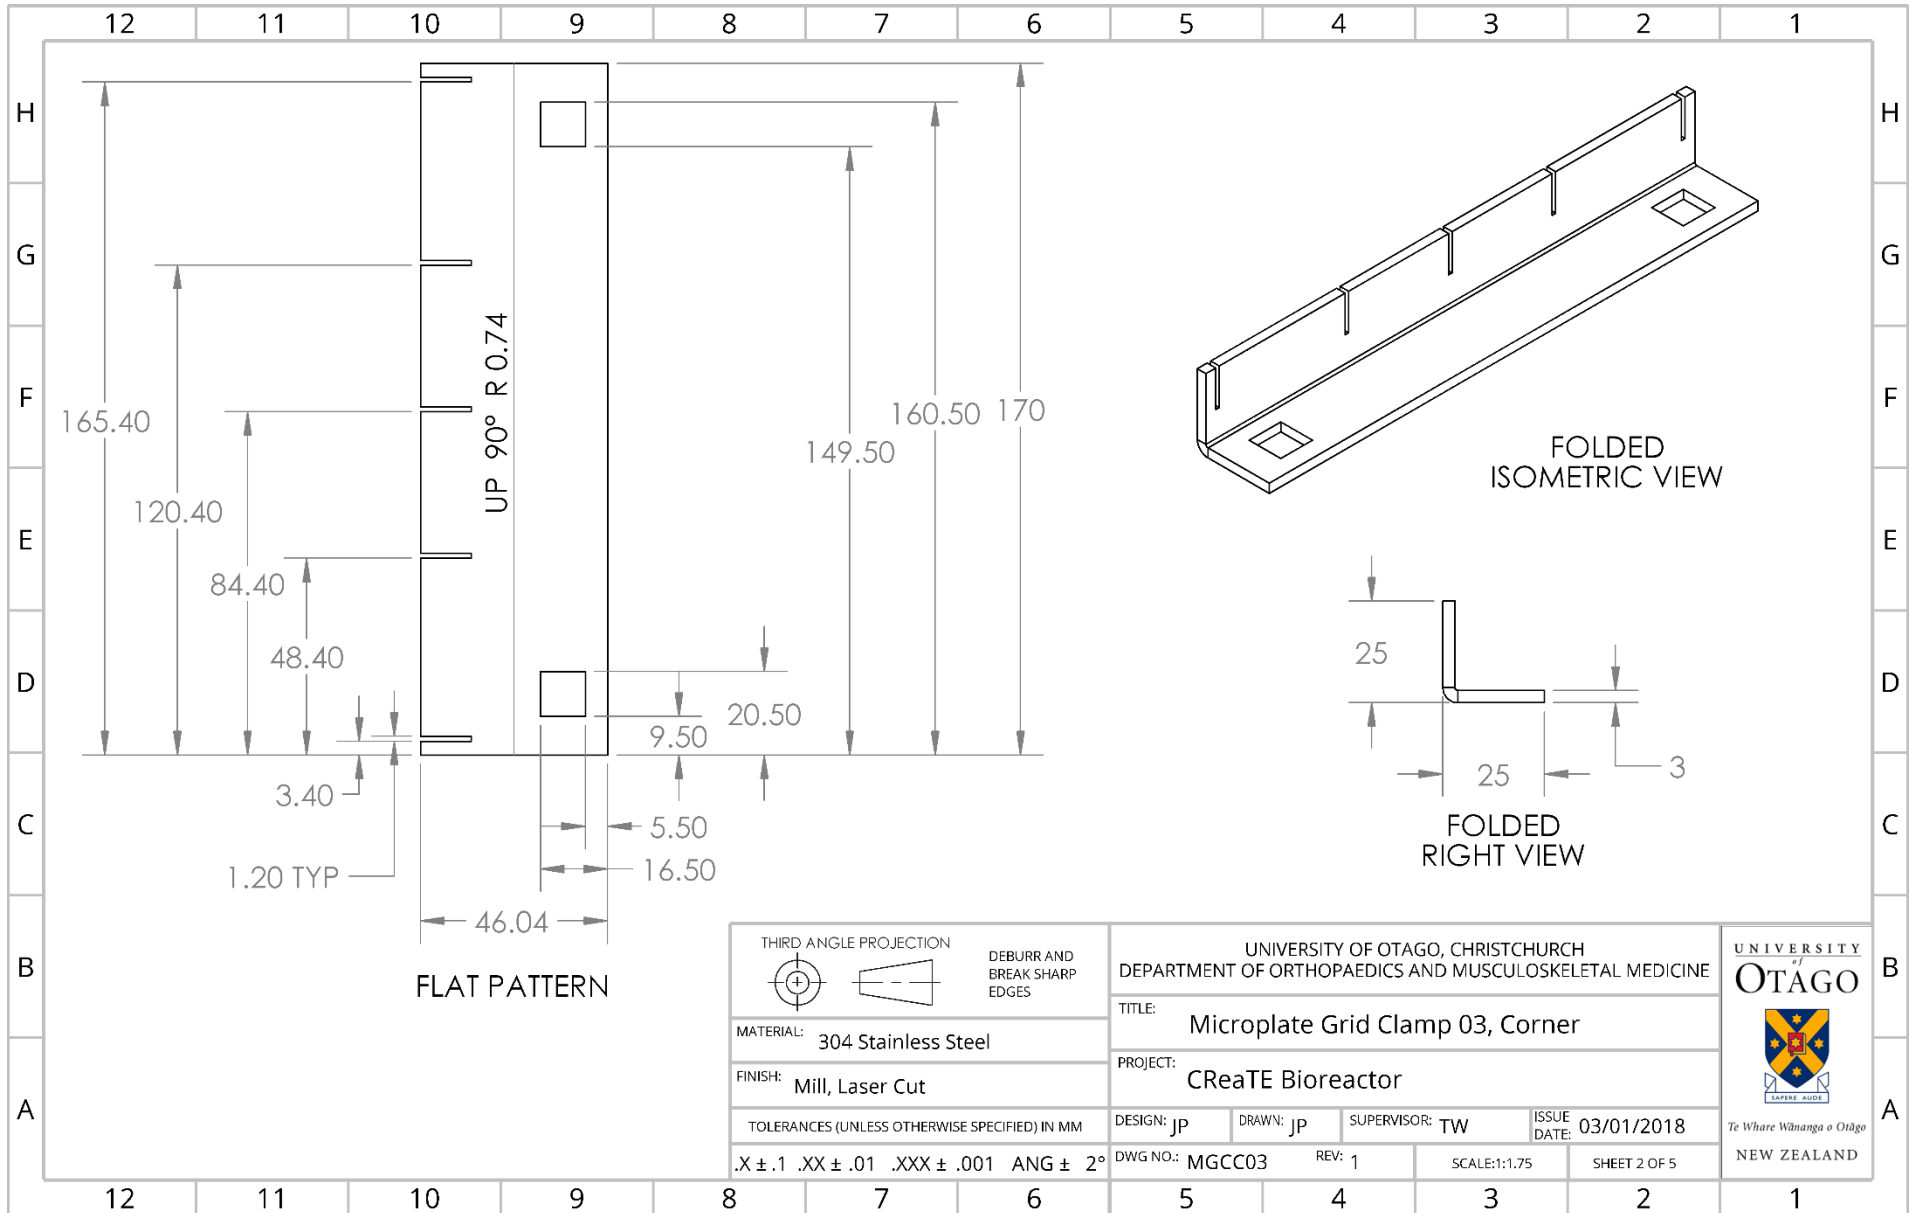

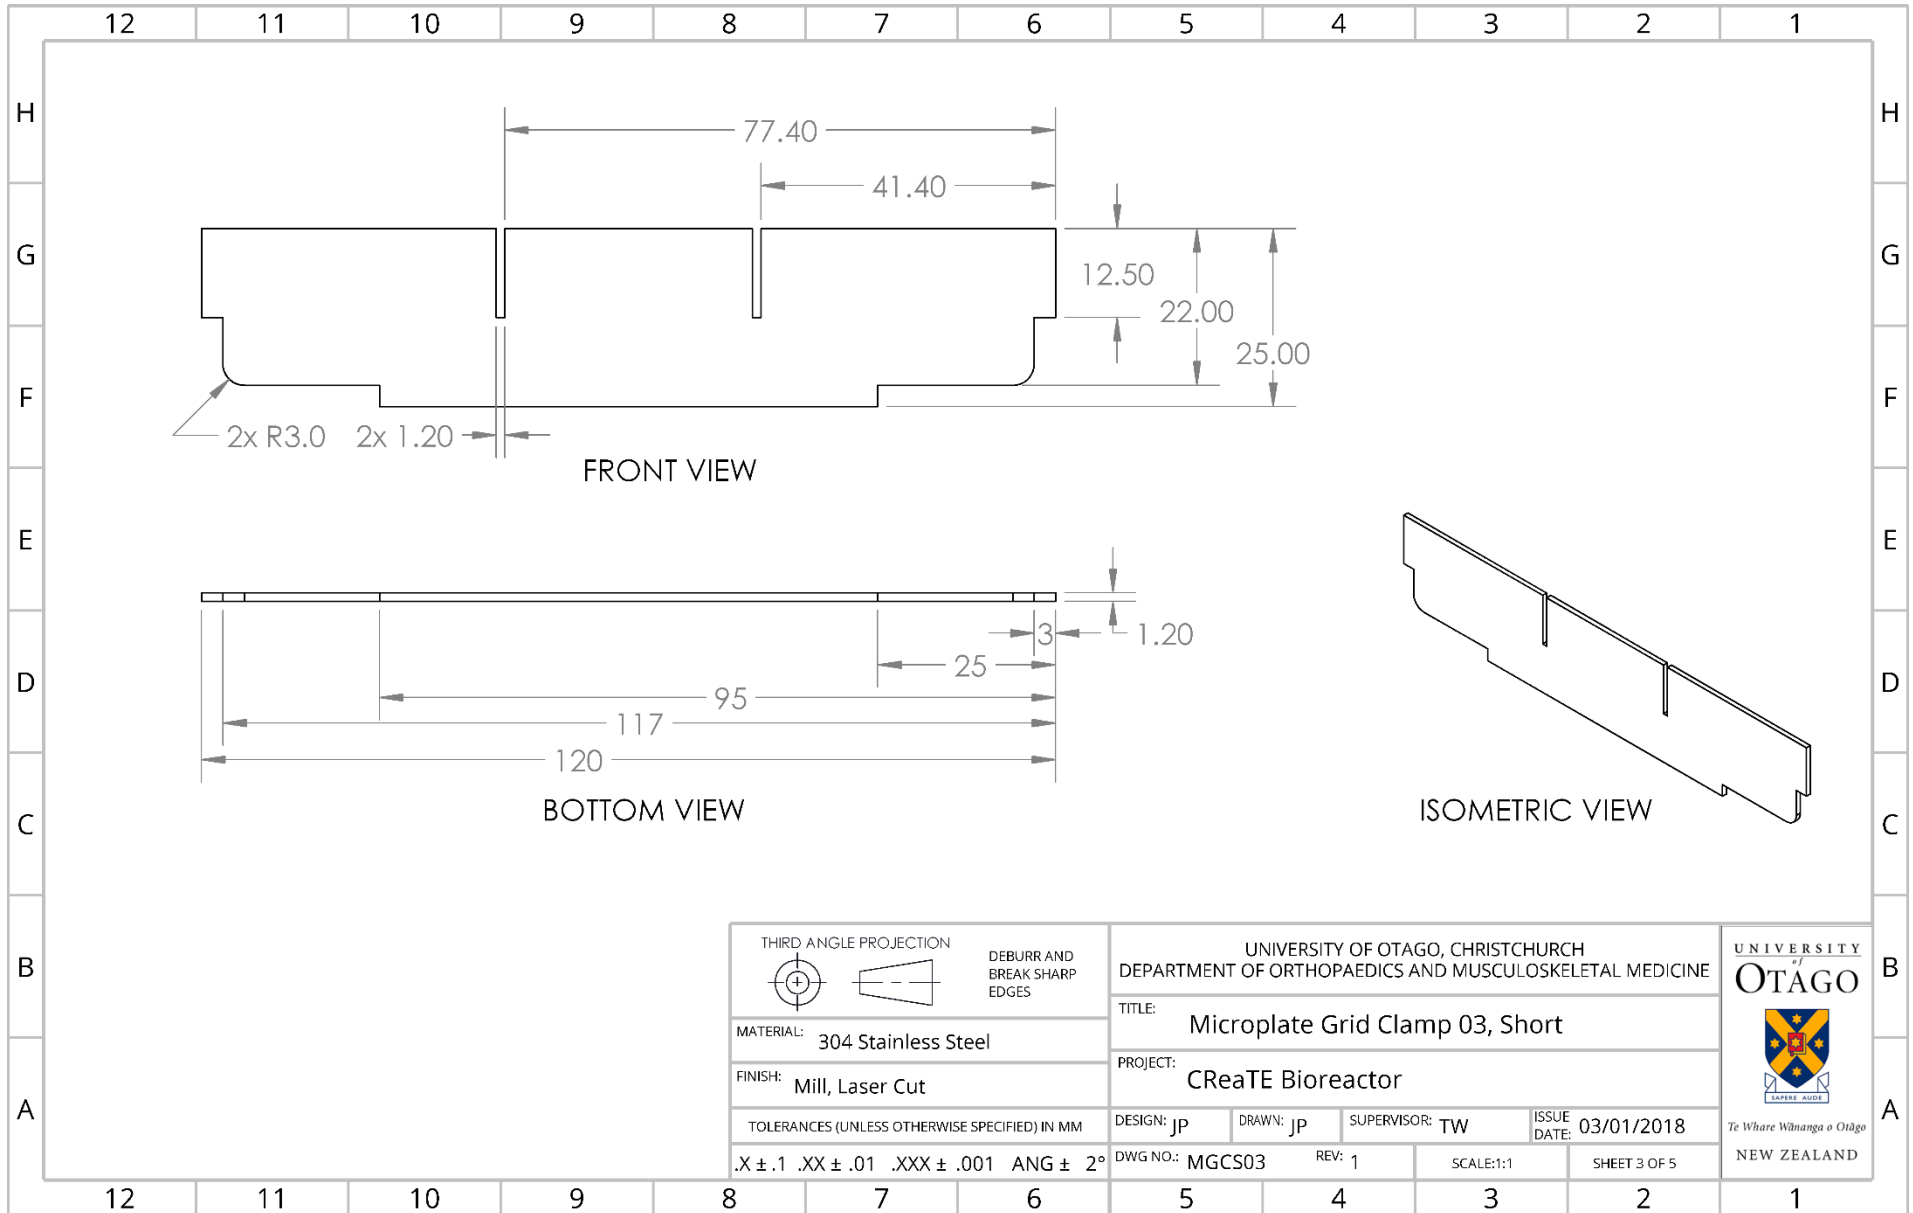

|                                                                                      |  |                                    |
|--------------------------------------------------------------------------------------|--|------------------------------------|
| THIRD ANGLE PROJECTION                                                               |  | DEBURR AND<br>BREAK SHARP<br>EDGES |
|  |  |                                    |
| MATERIAL: 304 Stainless Steel                                                        |  |                                    |
| FINISH: Mill, Laser Cut                                                              |  |                                    |
| TOLERANCES (UNLESS OTHERWISE SPECIFIED) IN MM                                        |  |                                    |
| .X ± .1 .XX ± .01 .XXX ± .001 ANG ± 2°                                               |  |                                    |

|                                                                                              |           |                |                        |
|----------------------------------------------------------------------------------------------|-----------|----------------|------------------------|
| UNIVERSITY OF OTAGO, CHRISTCHURCH<br>DEPARTMENT OF ORTHOPAEDICS AND MUSCULOSKELETAL MEDICINE |           |                |                        |
| TITLE: Microplate Grid Clamp 03, Short                                                       |           |                |                        |
| PROJECT: CReaTE Bioreactor                                                                   |           |                |                        |
| DESIGN: jp                                                                                   | DRAWN: jp | SUPERVISOR: TW | ISSUE DATE: 03/01/2018 |
| DWG NO.: MGCS03                                                                              | REV: 1    | SCALE:1:1      | SHEET 3 OF 5           |

|                                         |
|-----------------------------------------|
| UNIVERSITY<br>of<br>OTAGO               |
|                                         |
| Te Whare Wānanga o Ōtago<br>NEW ZEALAND |

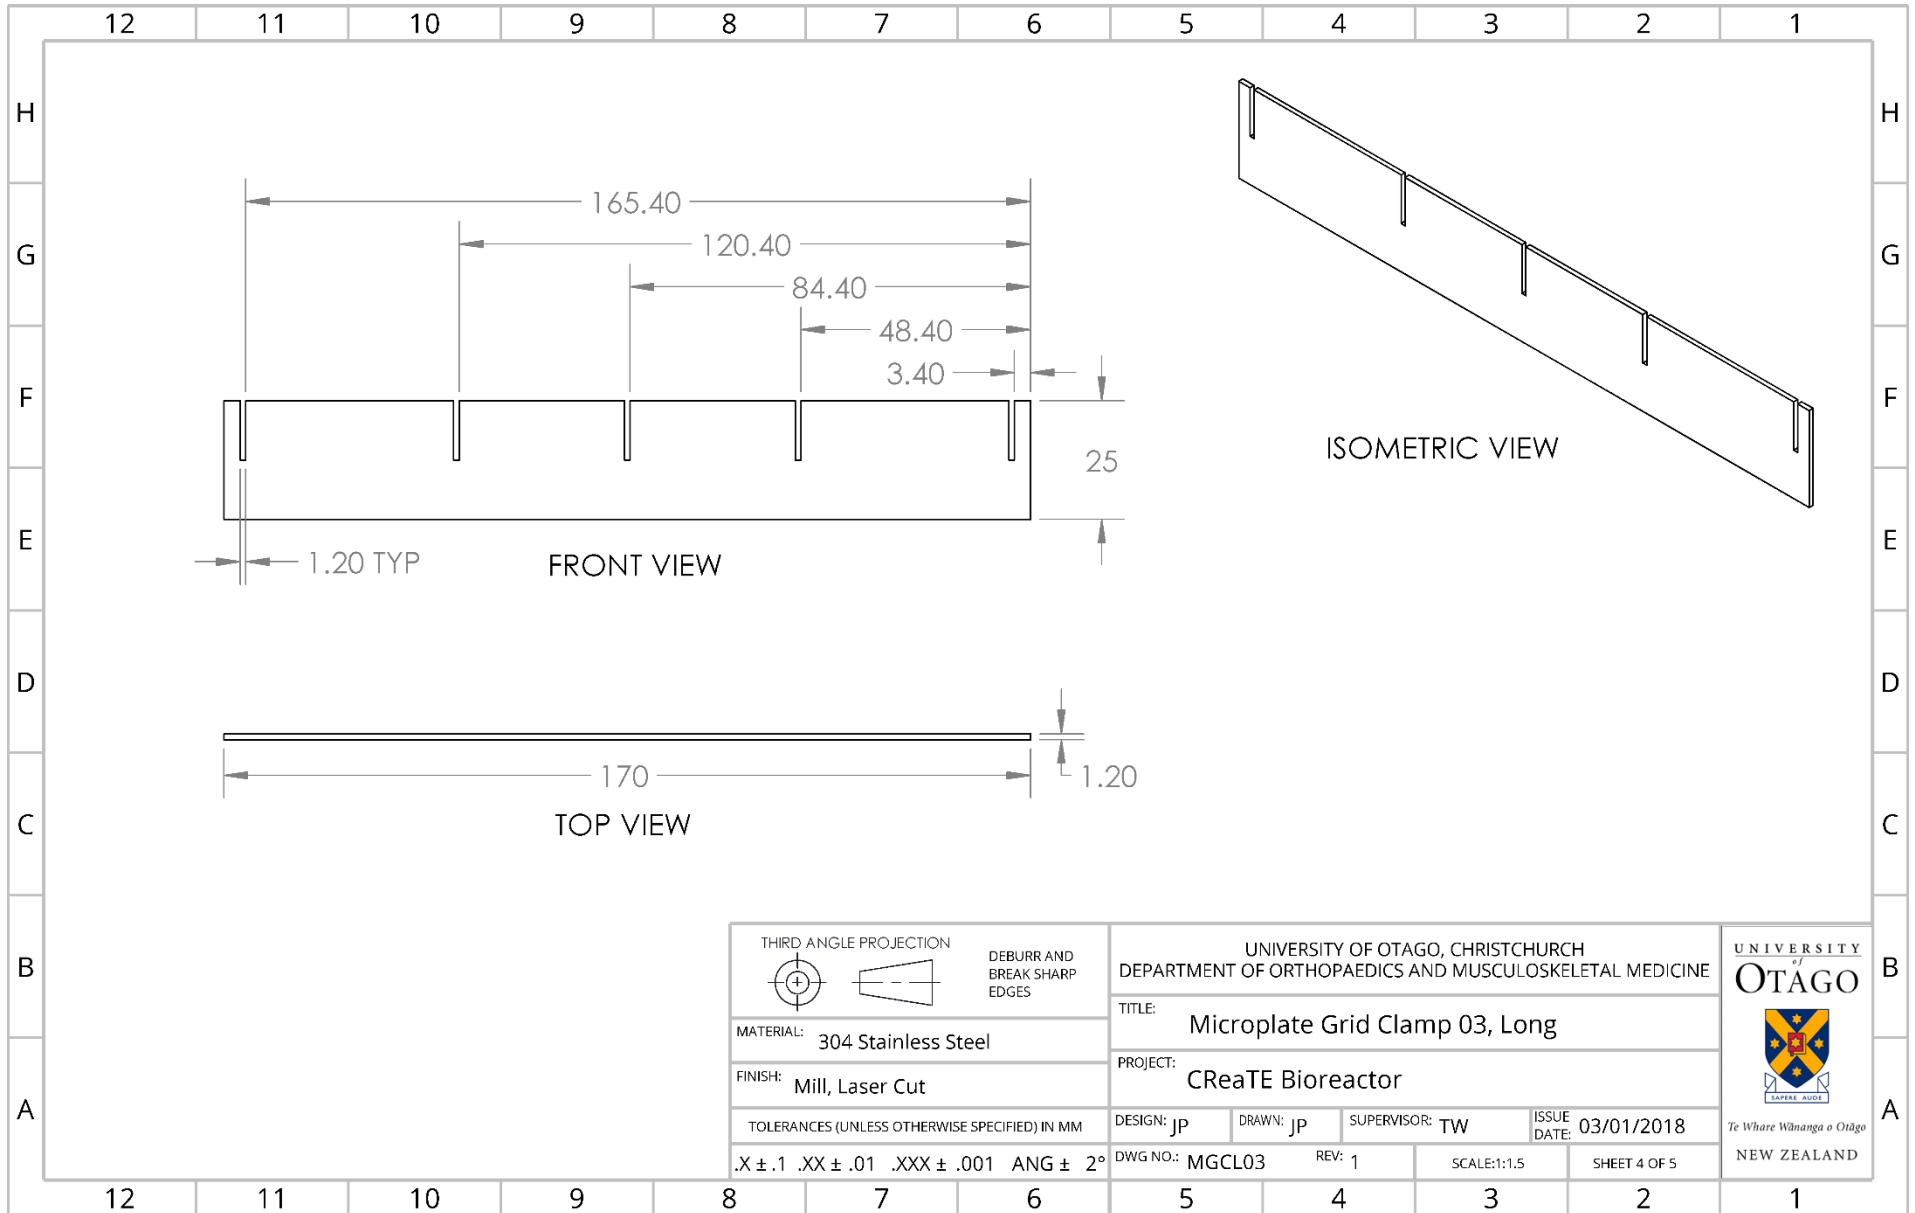

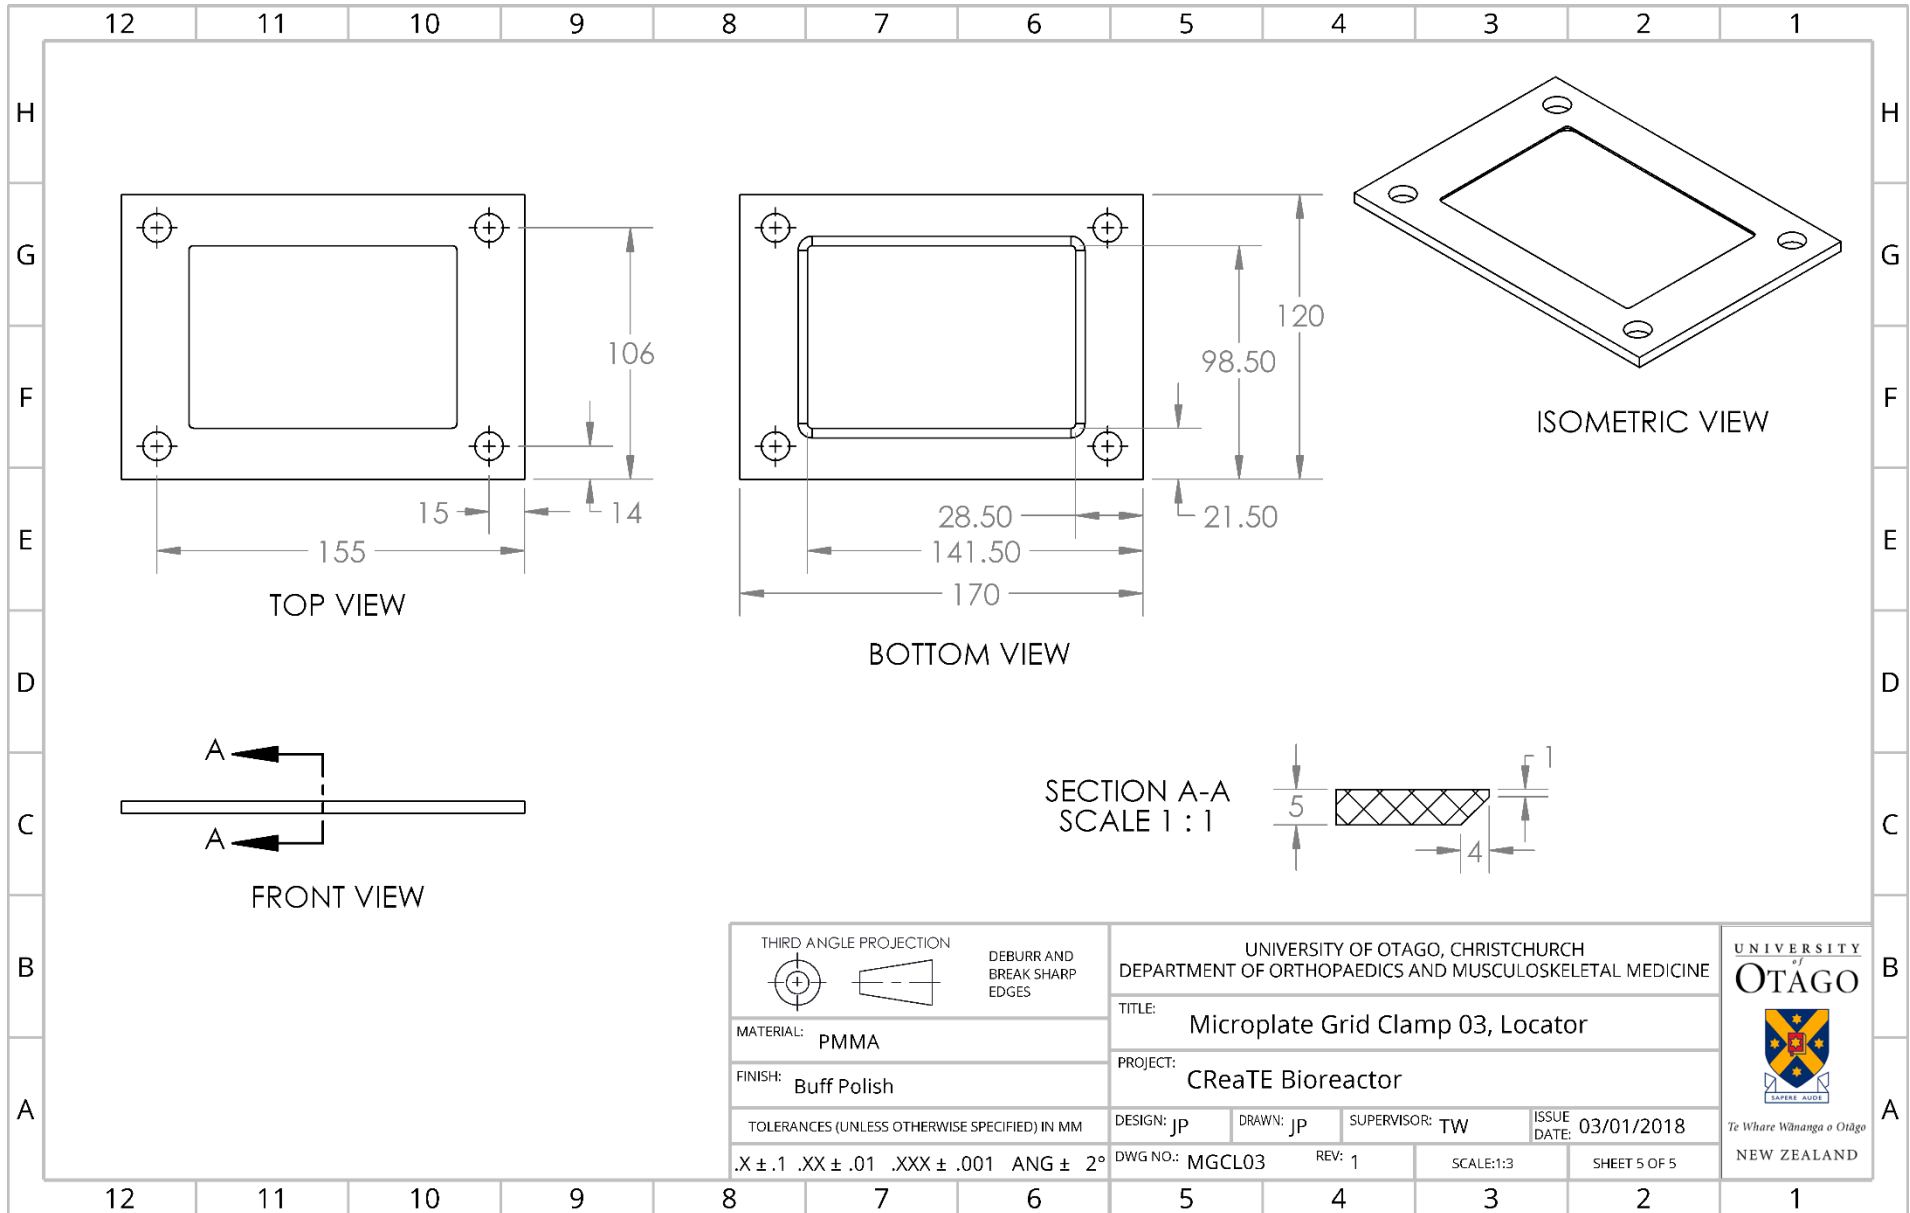



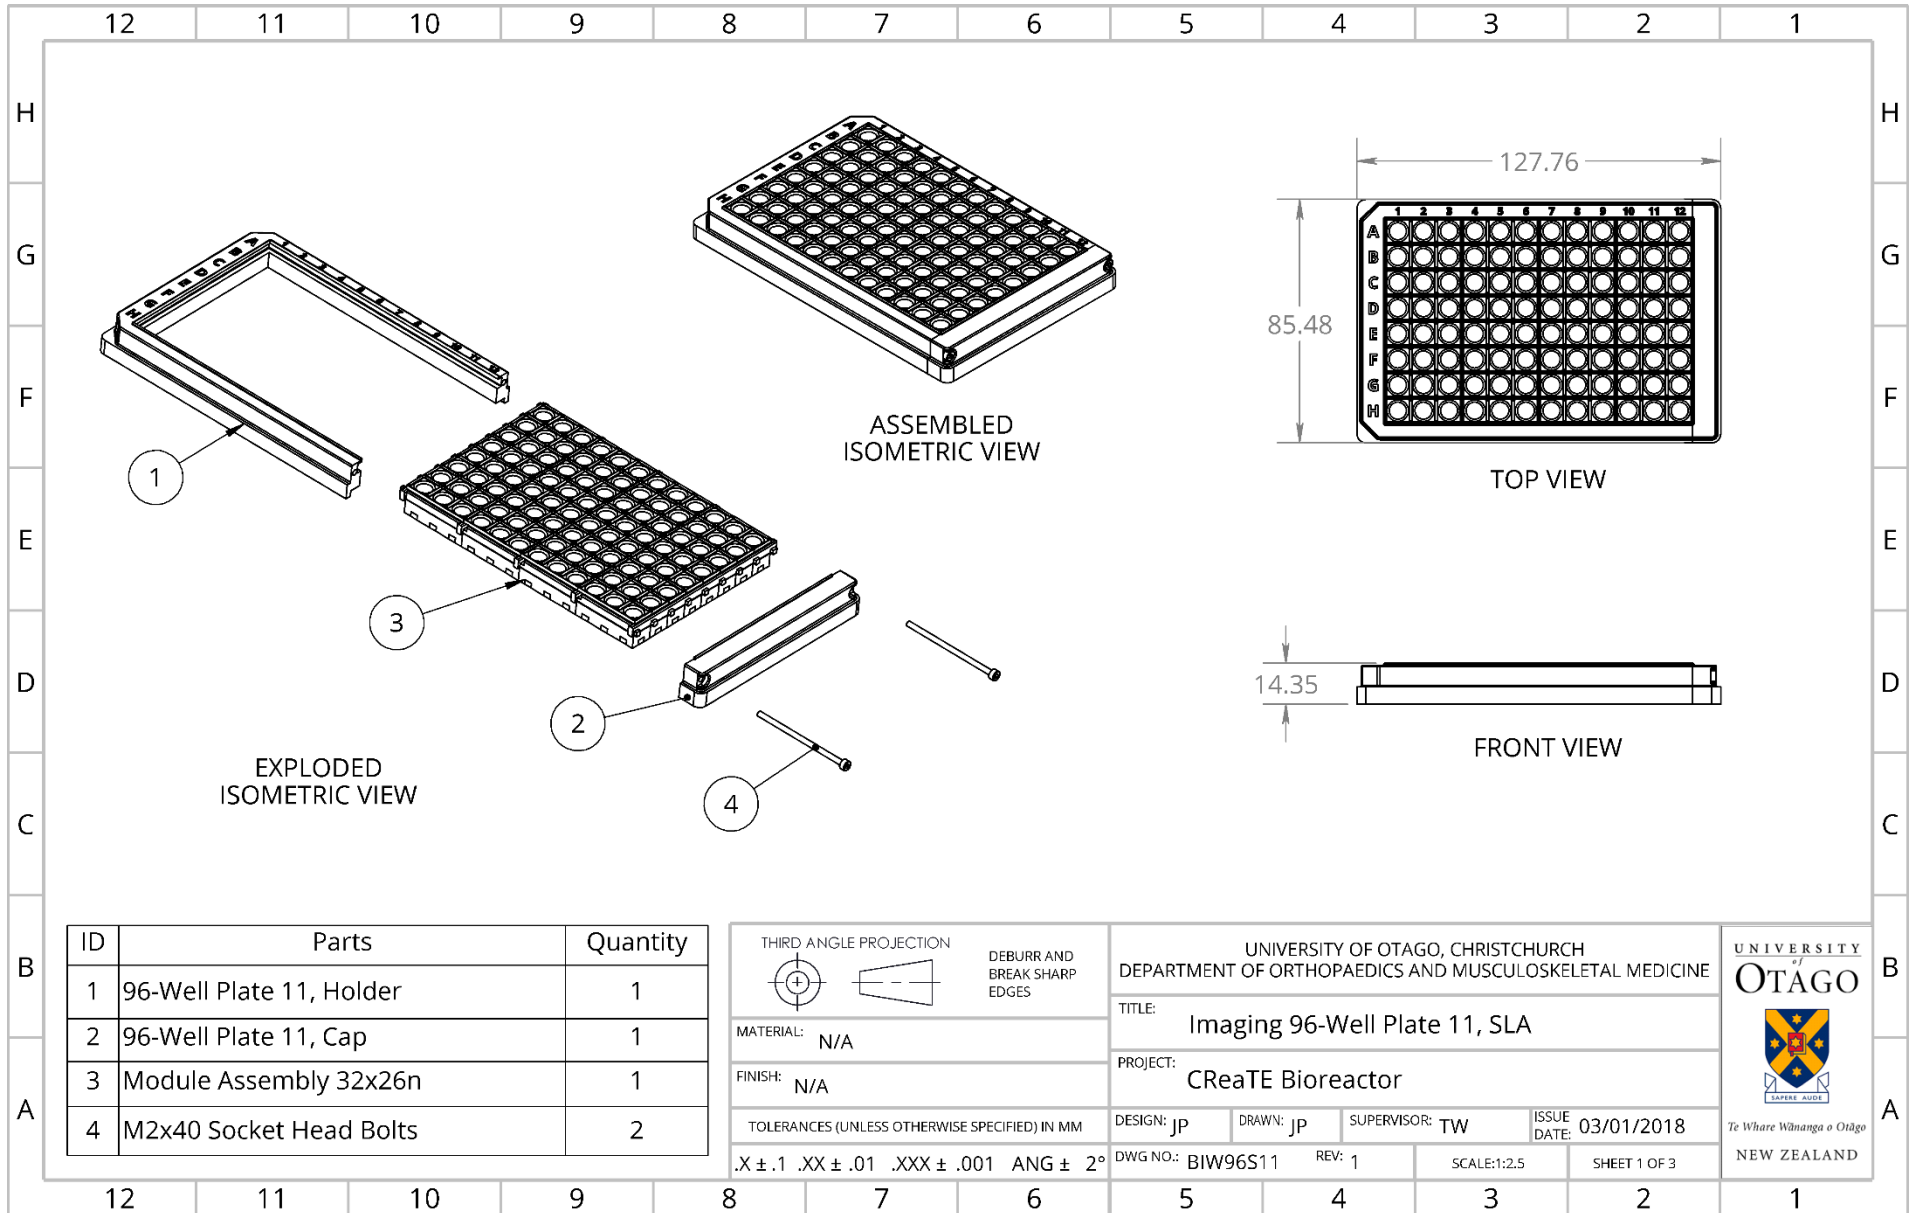

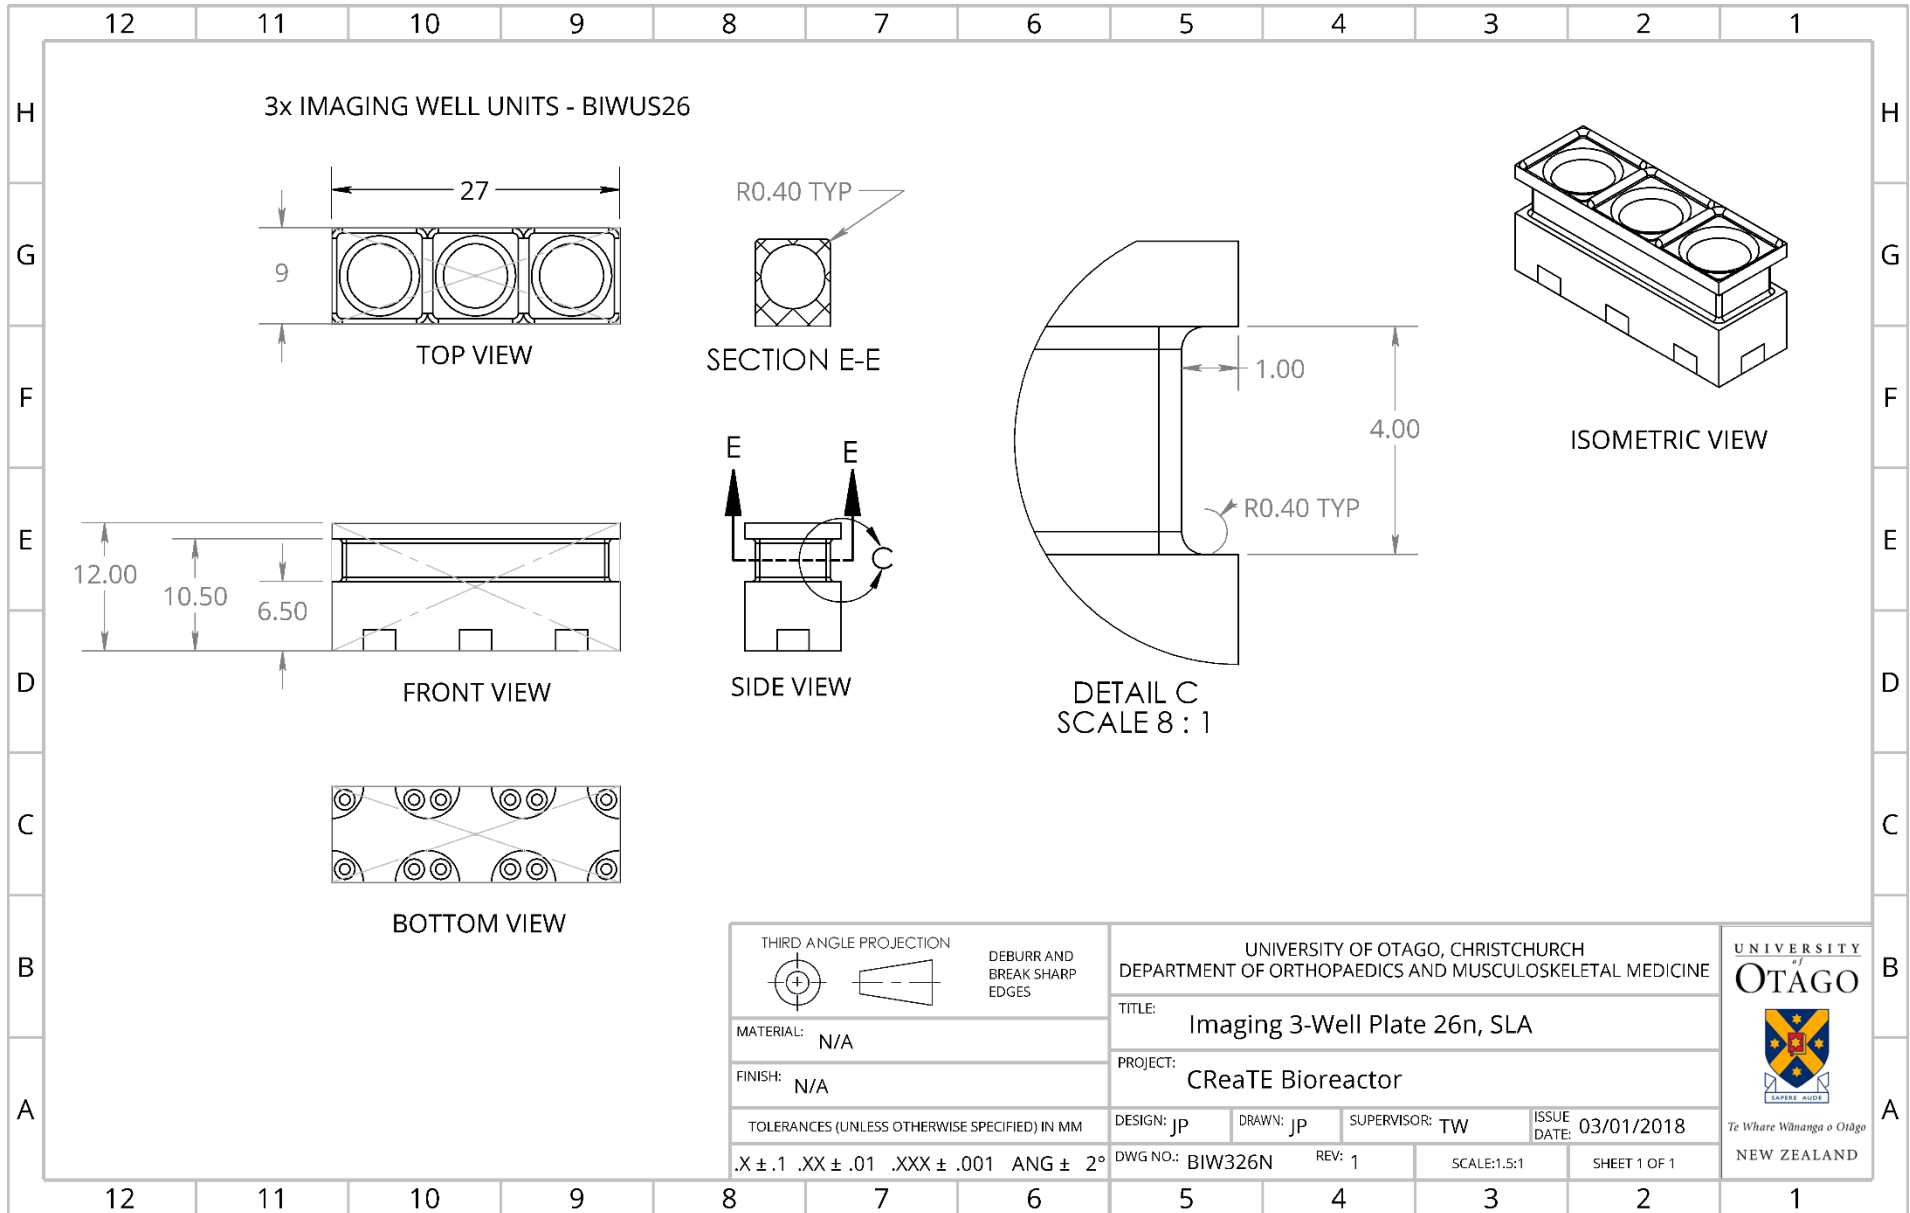

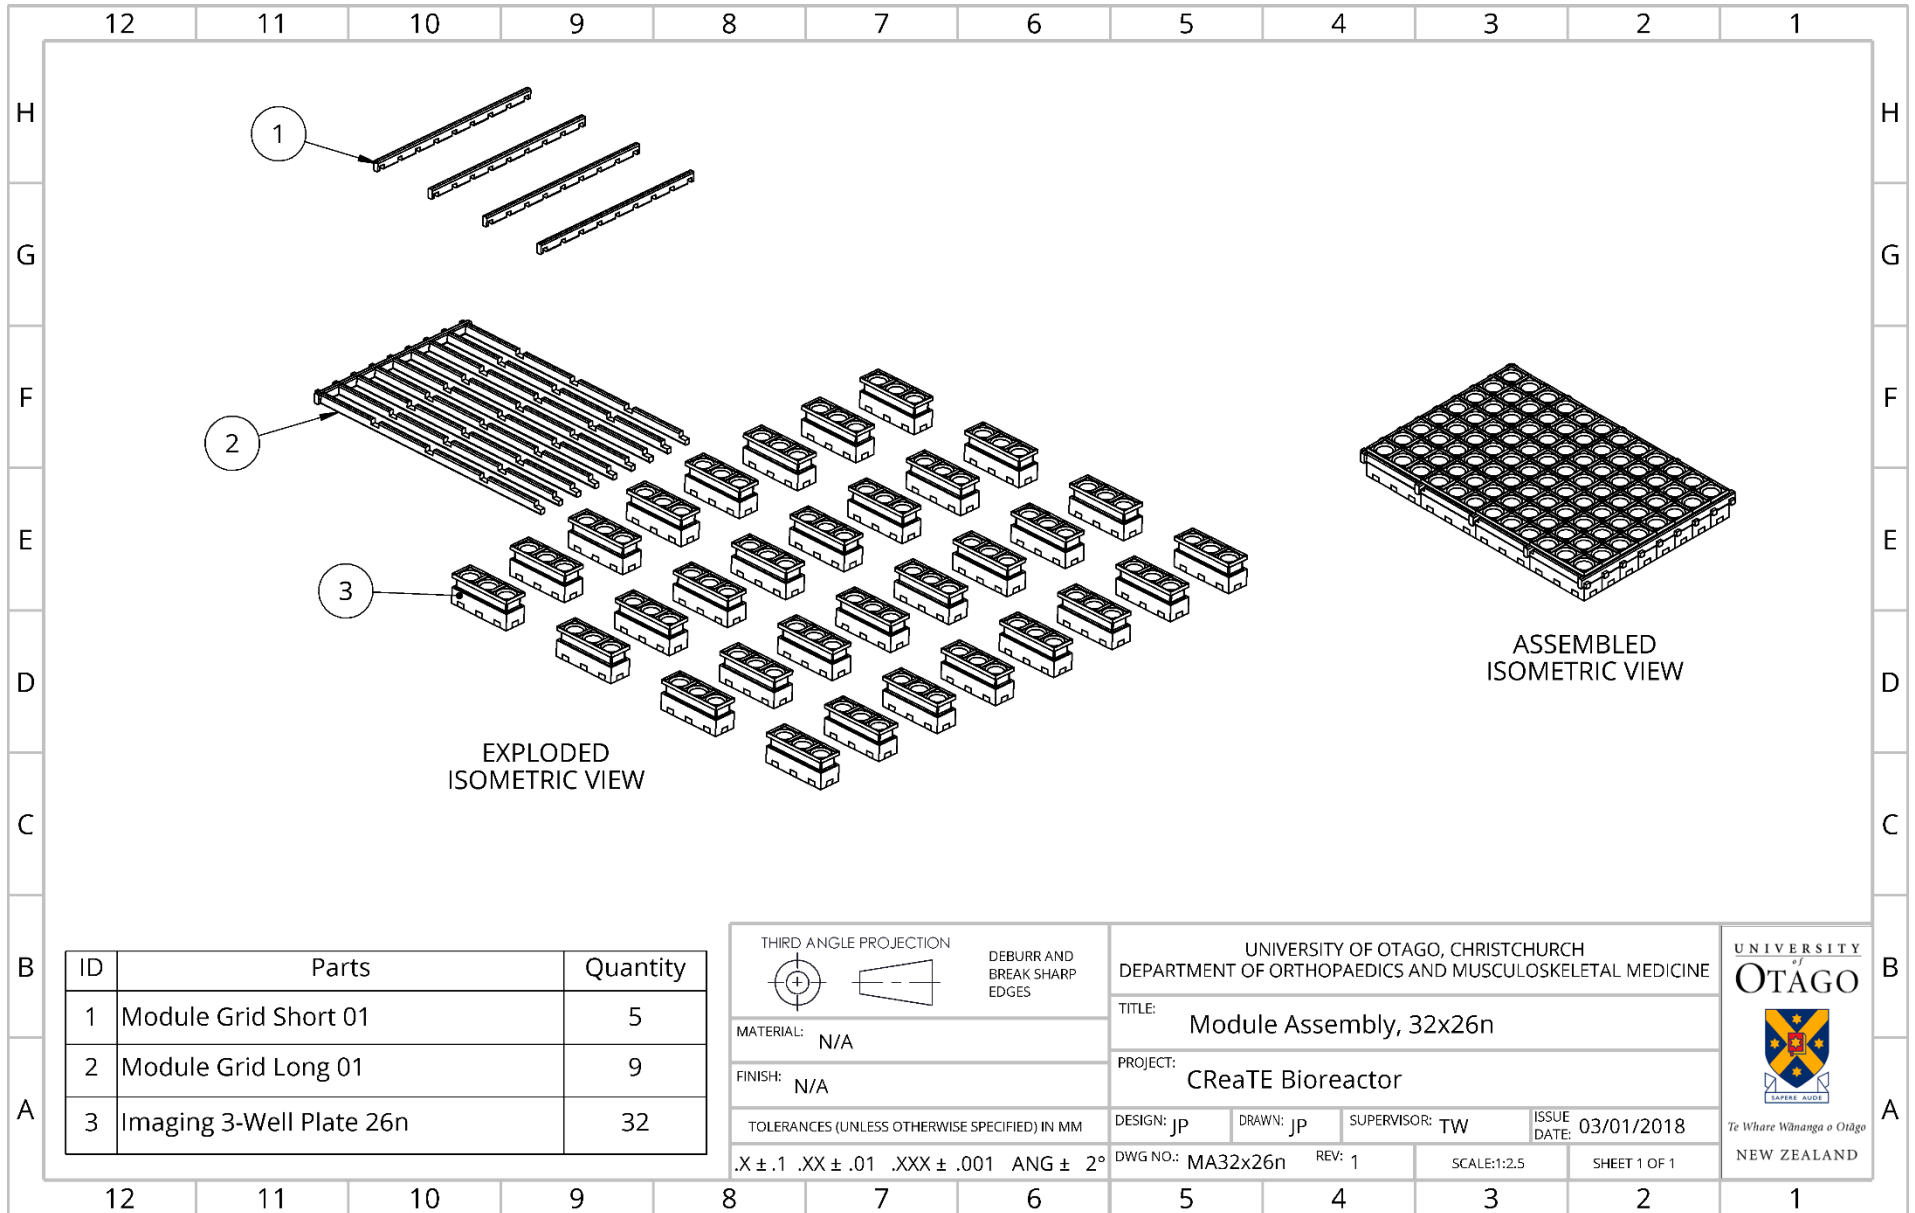

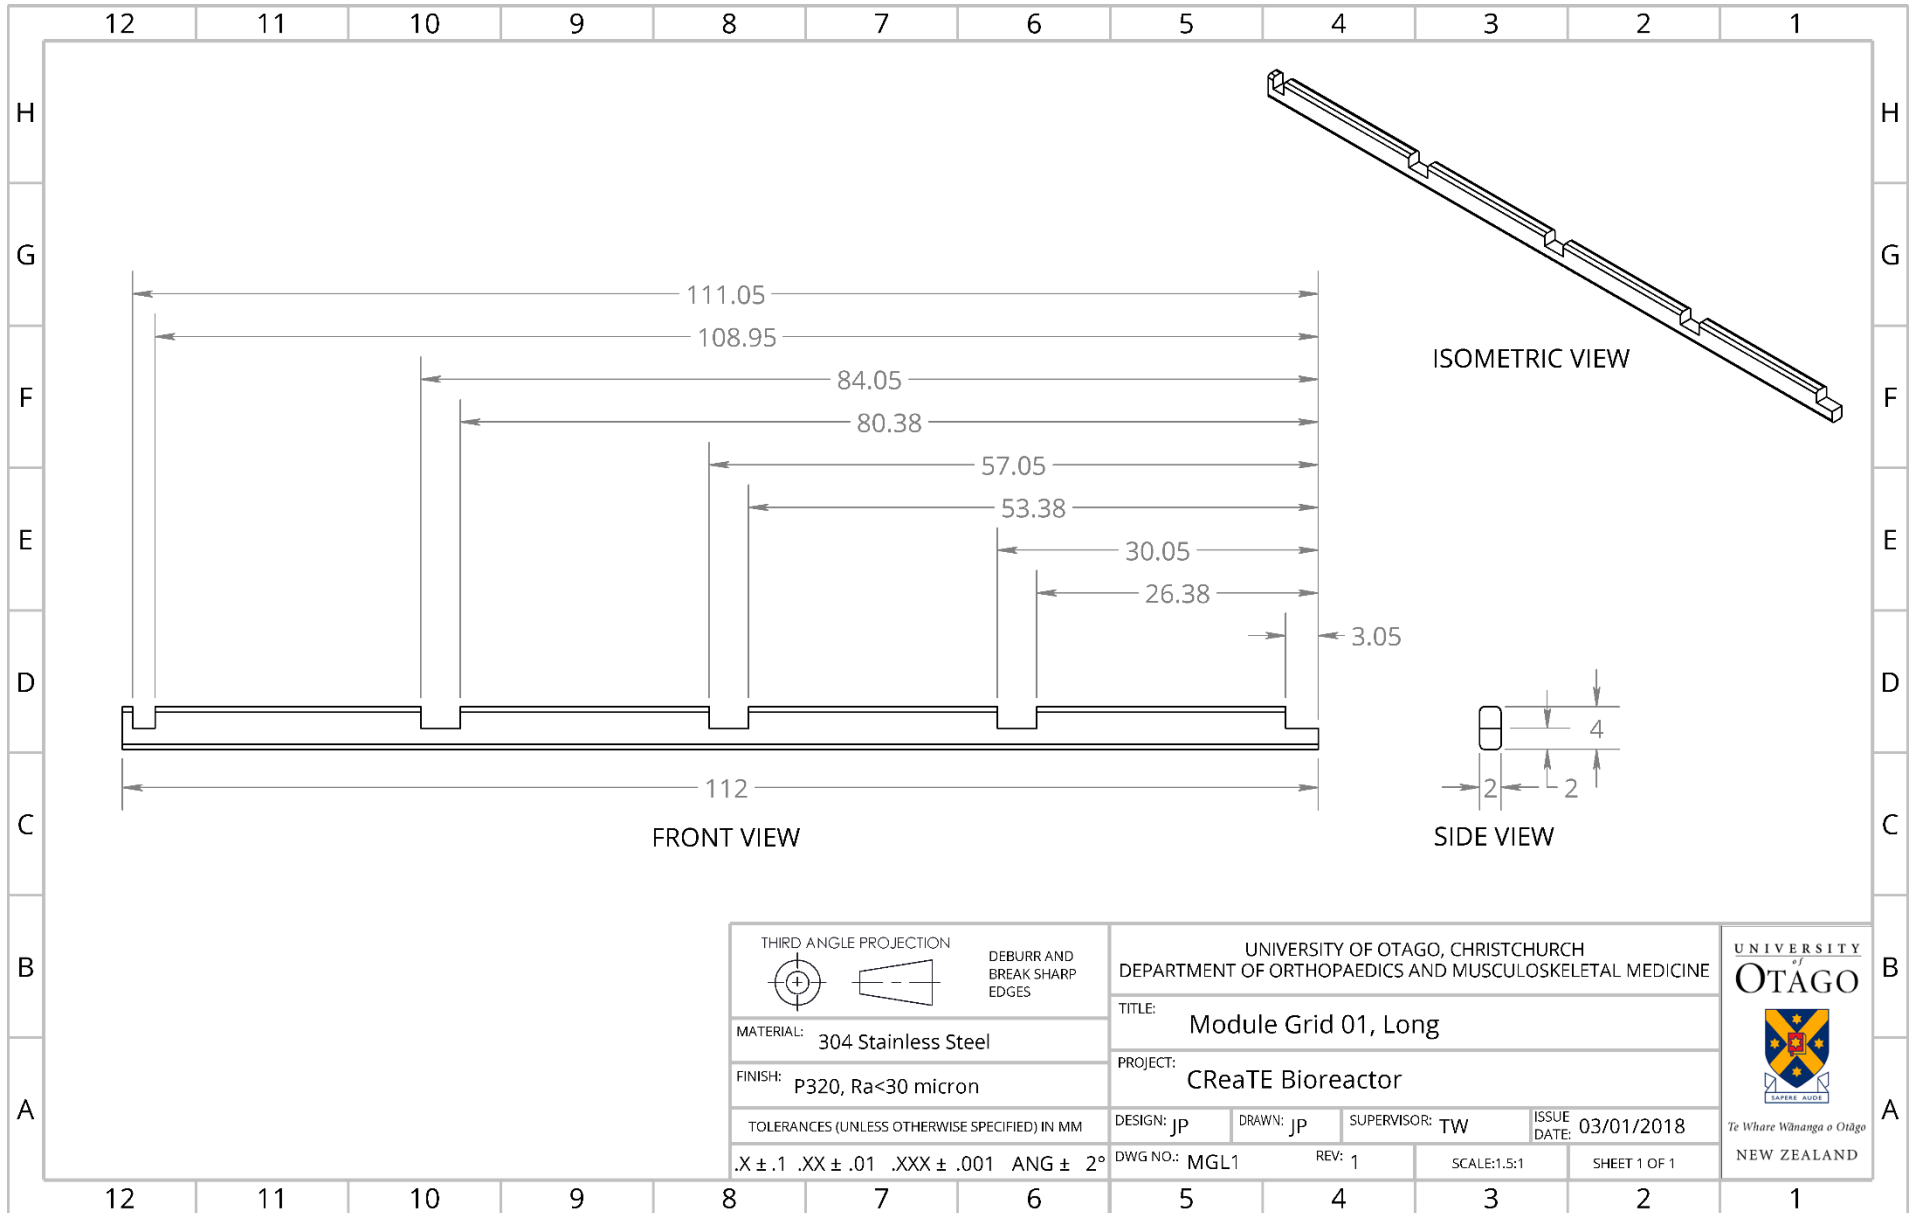

|                                                                                      |  |                                    |
|--------------------------------------------------------------------------------------|--|------------------------------------|
| THIRD ANGLE PROJECTION                                                               |  | DEBURR AND<br>BREAK SHARP<br>EDGES |
| 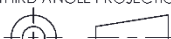 |  |                                    |
| MATERIAL: 304 Stainless Steel                                                        |  |                                    |
| FINISH: P320, Ra<30 micron                                                           |  |                                    |
| TOLERANCES (UNLESS OTHERWISE SPECIFIED) IN MM                                        |  |                                    |
| .X ± .1 .XX ± .01 .XXX ± .001 ANG ± 2°                                               |  |                                    |

|                                                         |           |                |                        |
|---------------------------------------------------------|-----------|----------------|------------------------|
| UNIVERSITY OF OTAGO, CHRISTCHURCH                       |           |                |                        |
| DEPARTMENT OF ORTHOPAEDICS AND MUSCULOSKELETAL MEDICINE |           |                |                        |
| TITLE: Module Grid 01, Long                             |           |                |                        |
| PROJECT: CReaTE Bioreactor                              |           |                |                        |
| DESIGN: jp                                              | DRAWN: jp | SUPERVISOR: TW | ISSUE DATE: 03/01/2018 |
| DWG NO.: MGL1                                           | REV: 1    | SCALE: 1.5:1   | SHEET 1 OF 1           |

|                                                |
|------------------------------------------------|
| UNIVERSITY<br><b>OTAGO</b>                     |
|                                                |
| <i>Te Whare Wānanga o Ōtago</i><br>NEW ZEALAND |

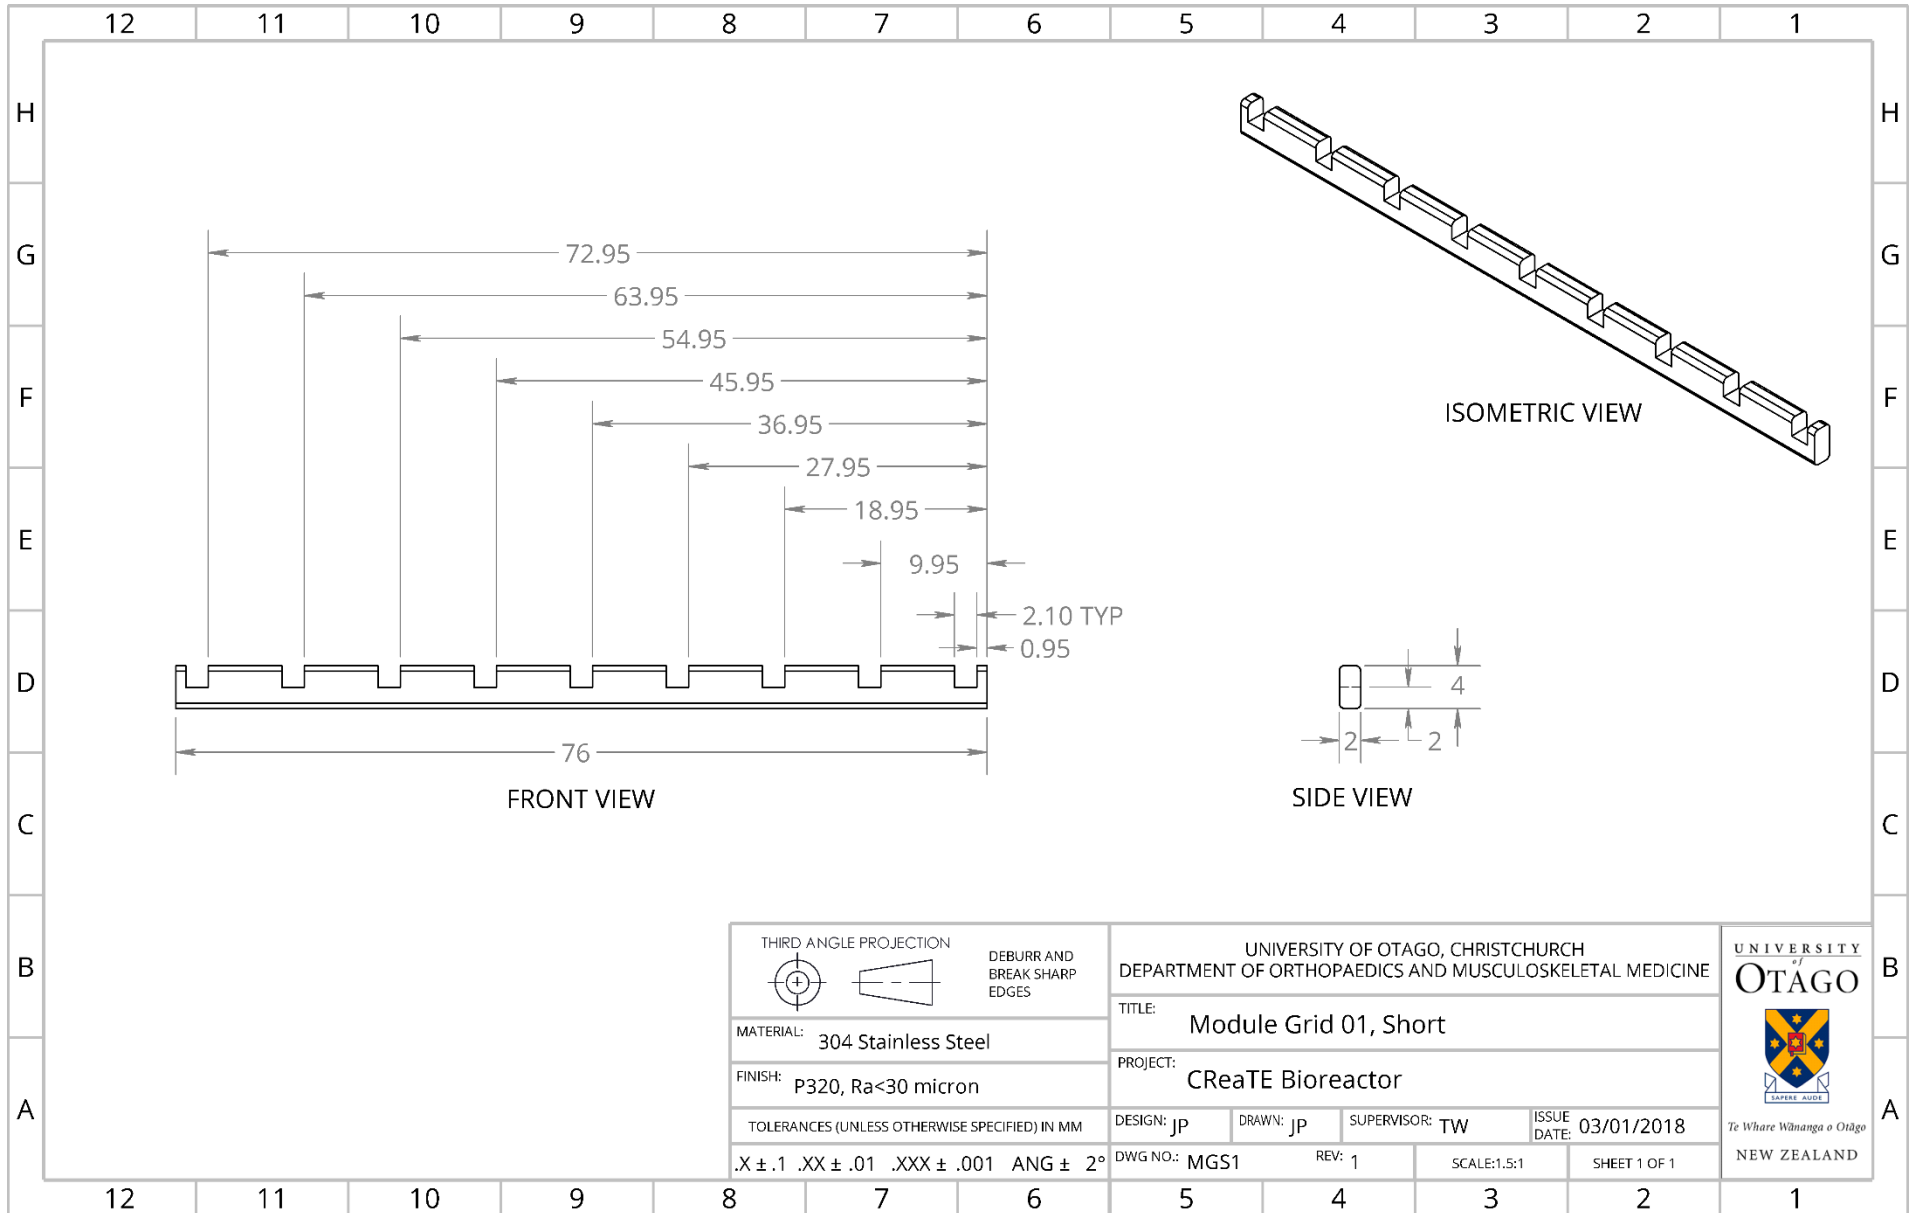

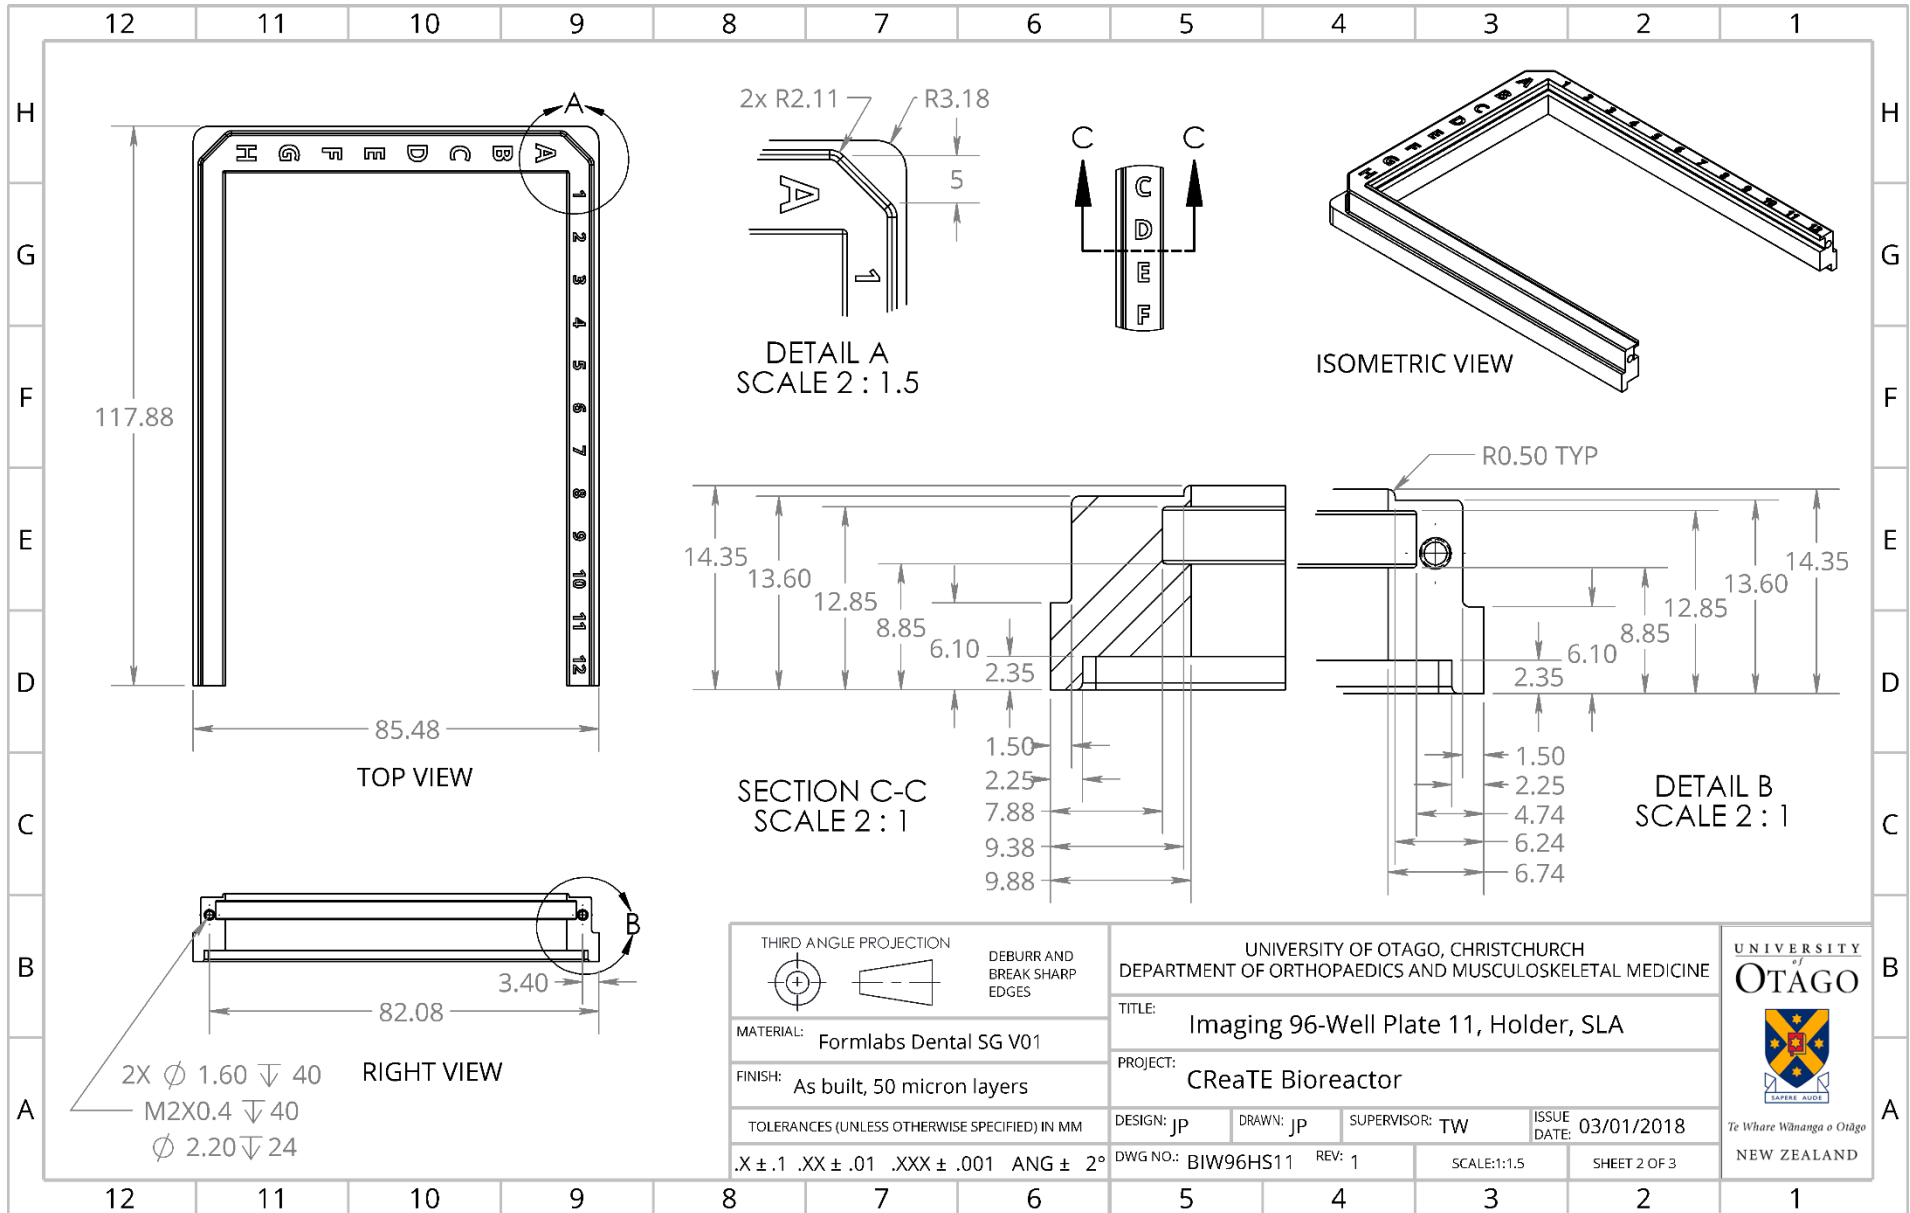

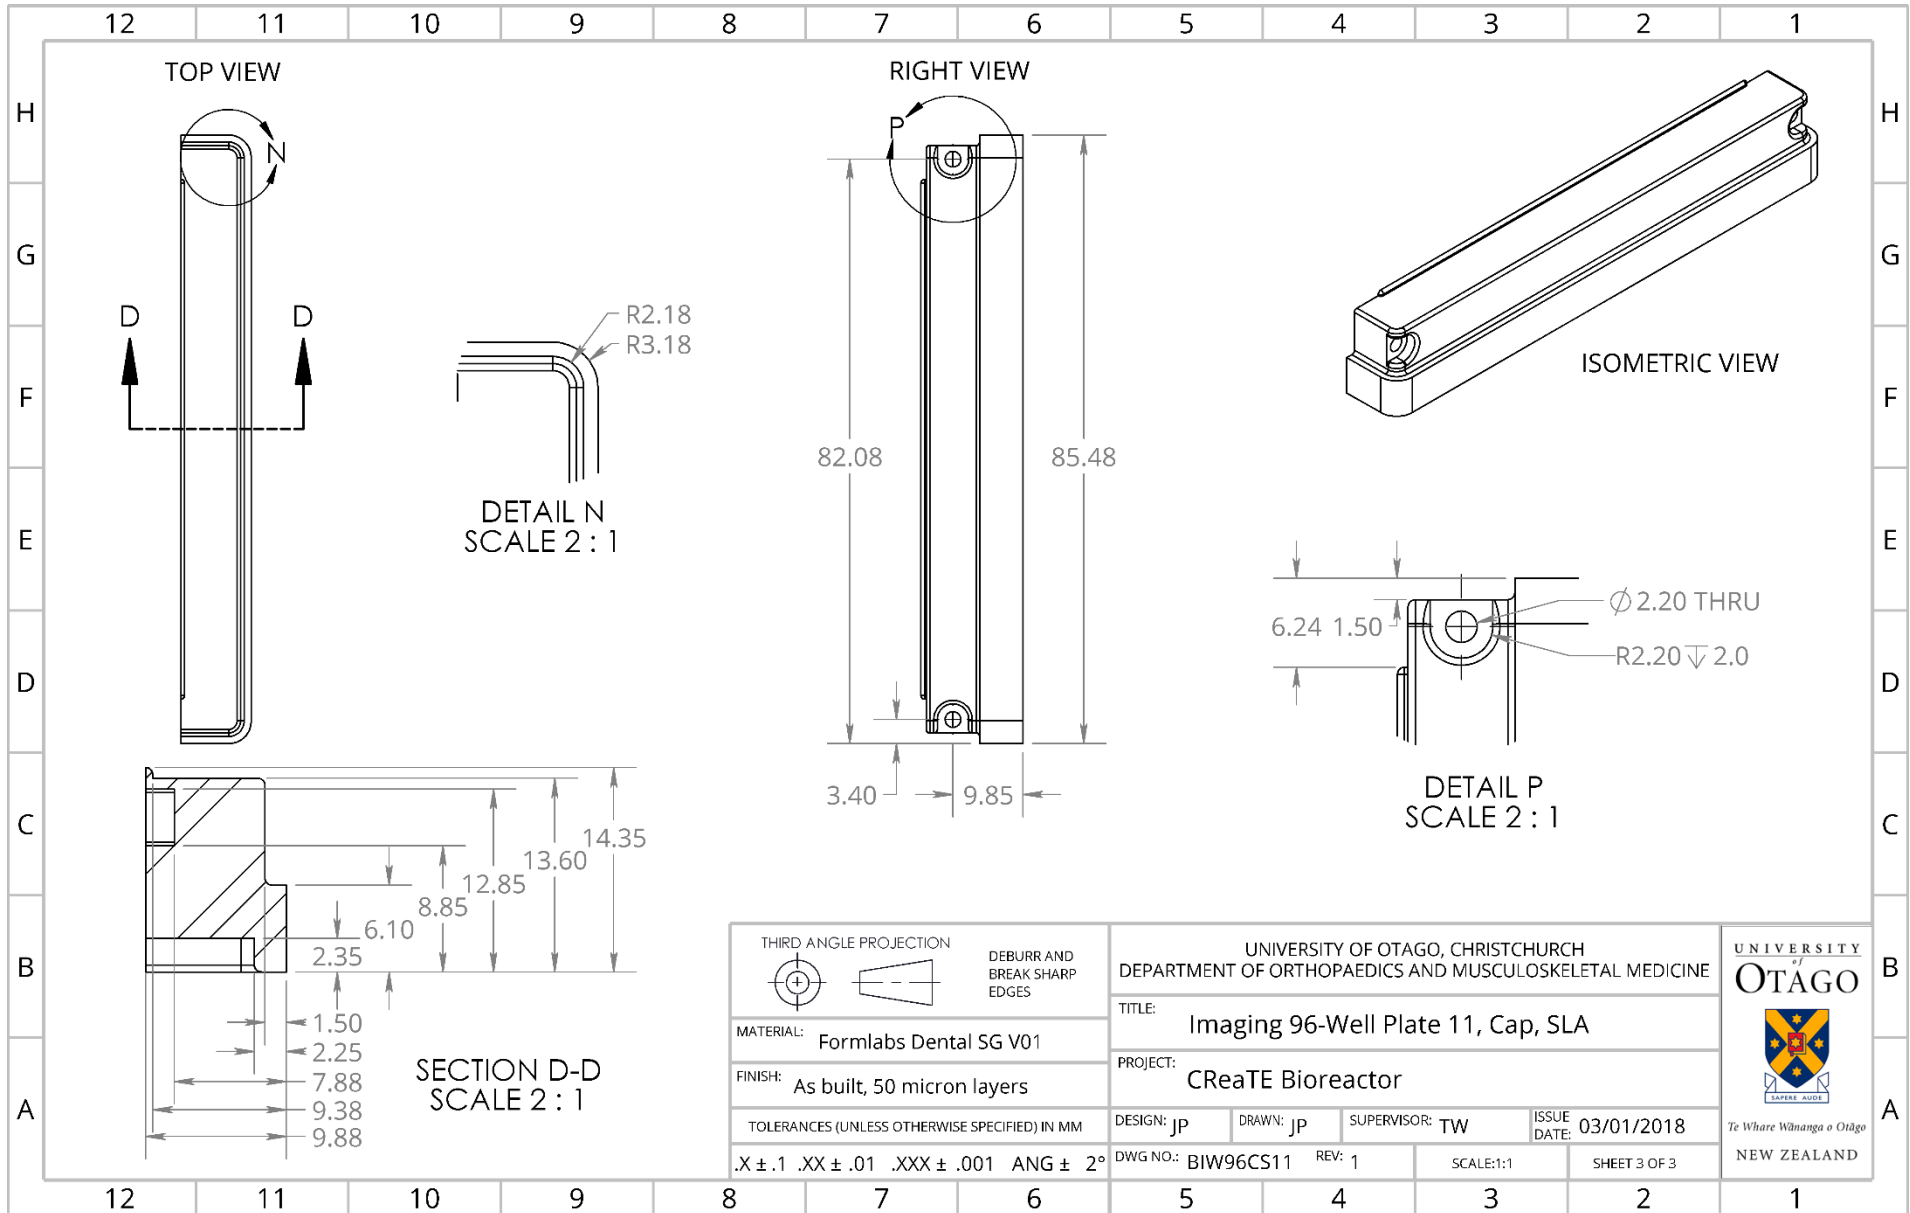

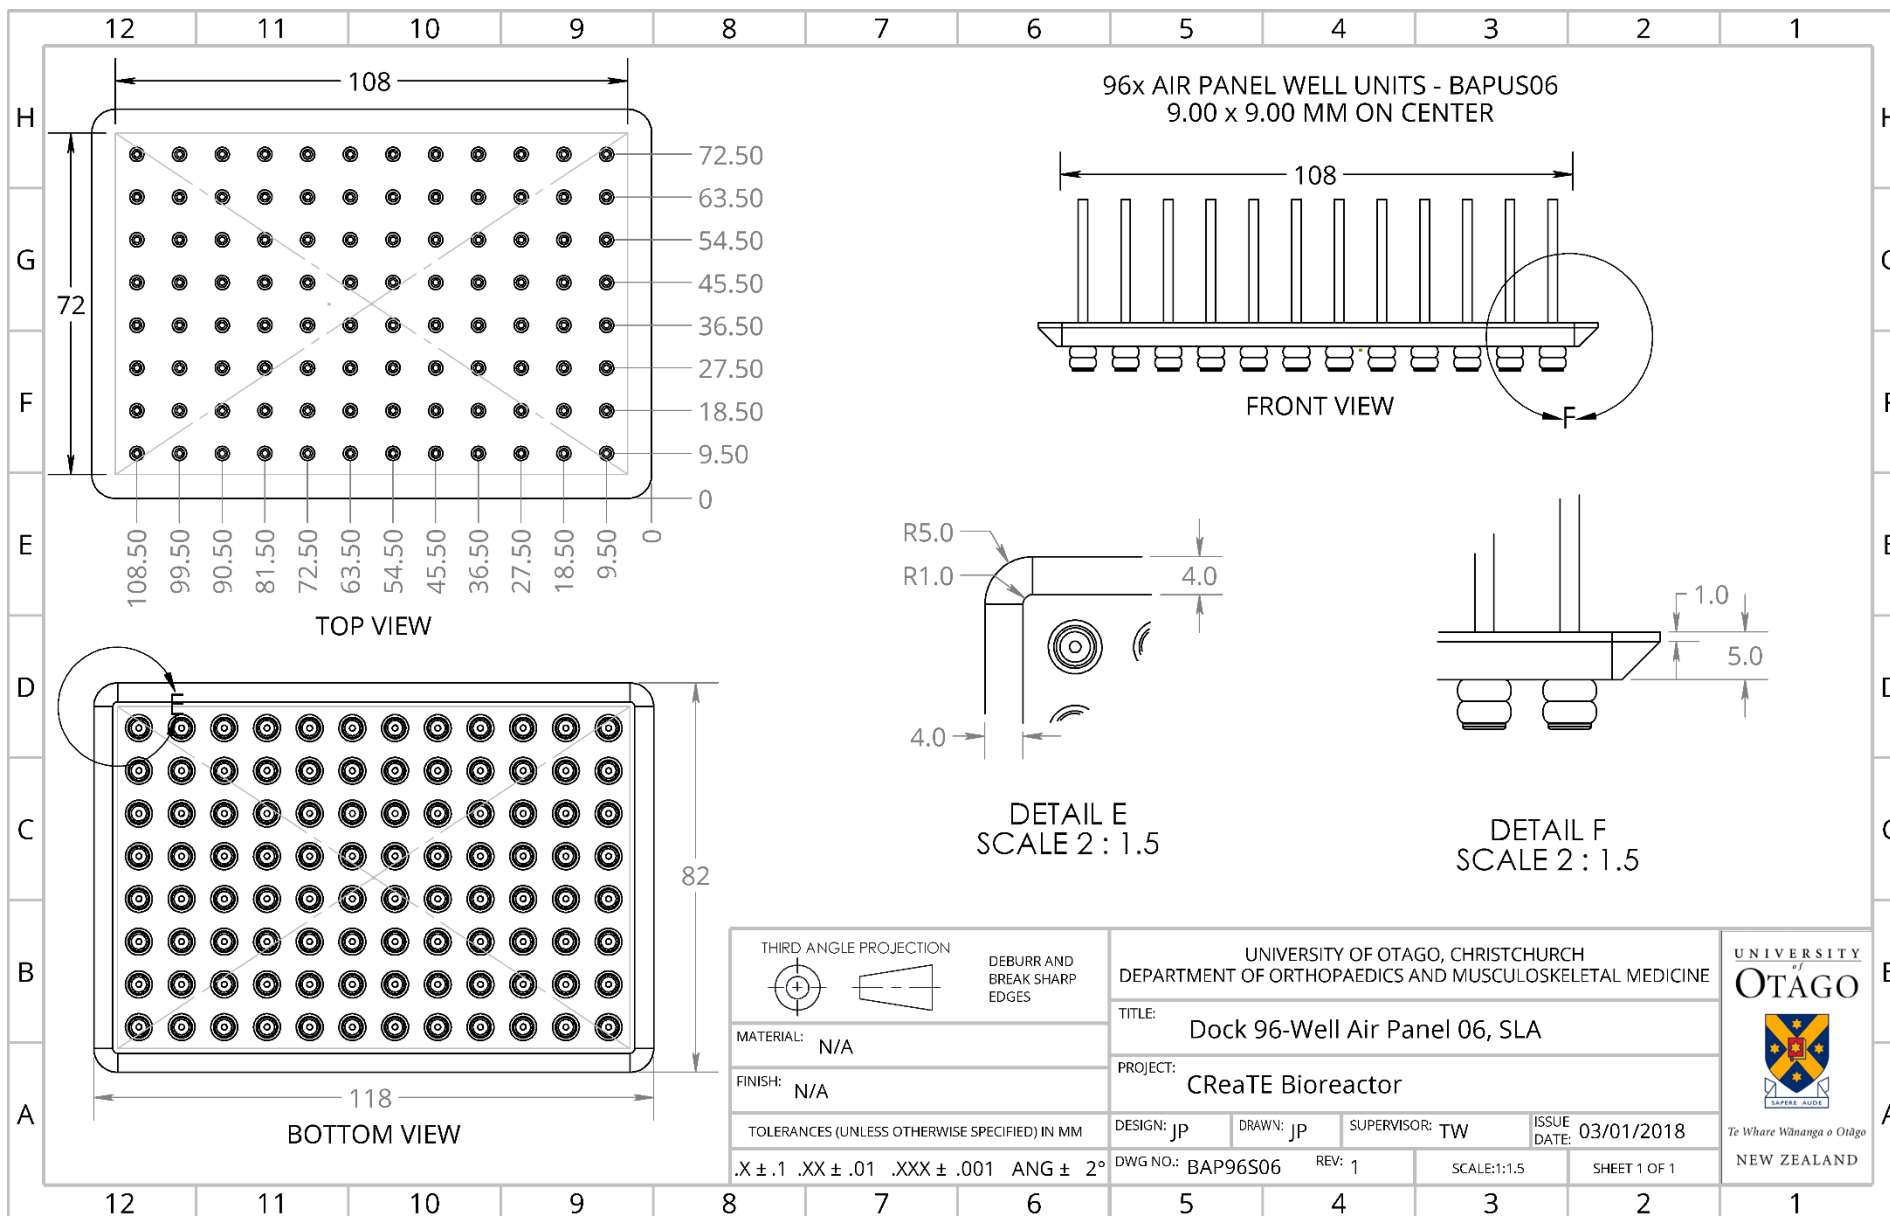



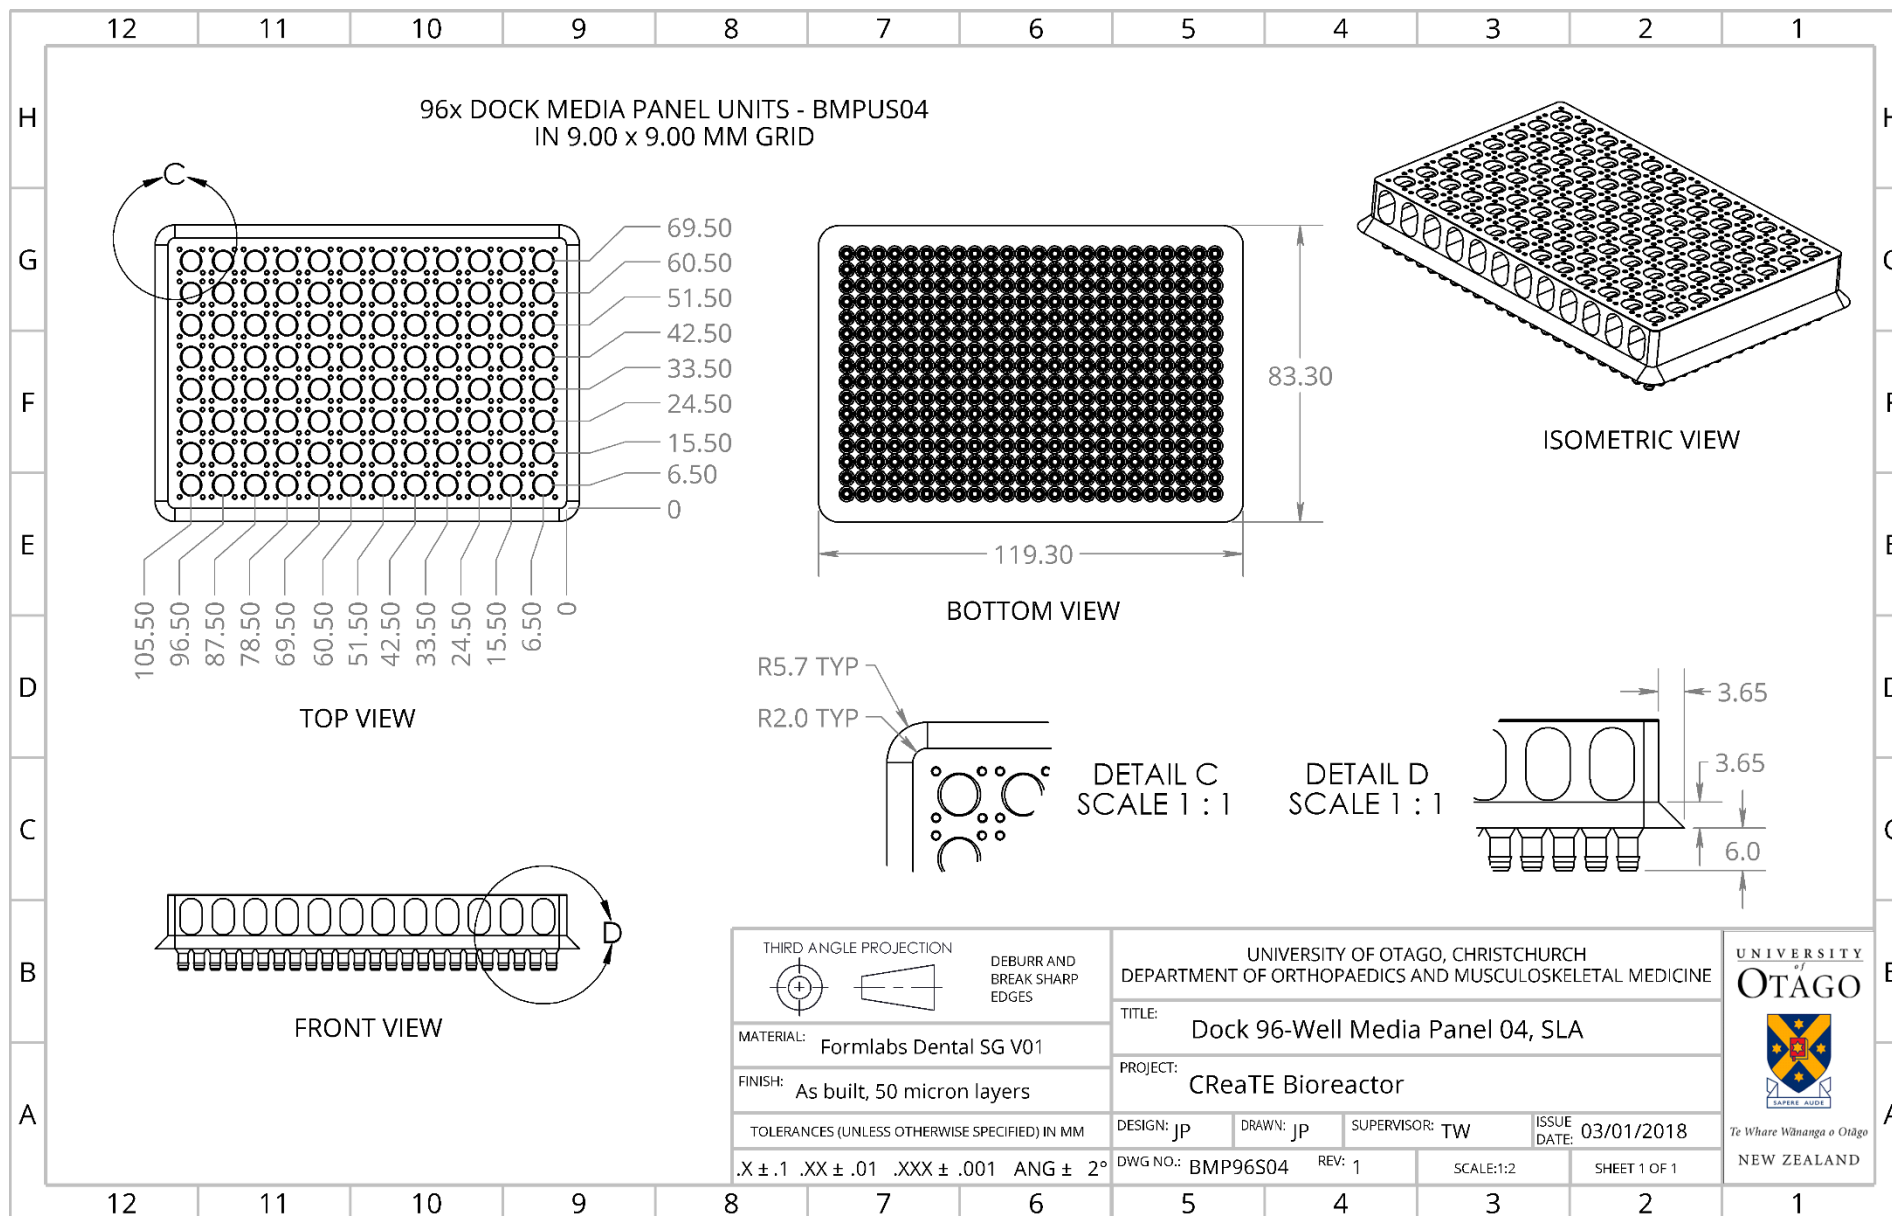

Supplement: c8lc00485d2.pdf [file c8lc00485d2.pdf]
